# Supplementary material for: Pd-Catalysed direct C(sp2)–H fluorination of aromatic ketones: concise access to anacetrapib
Source: Royal Society of Chemistry journal article supplement (doi:10.1039/d1cc01047f), 2021-01-01

# Pd-Catalyzed Direct C(*sp*<sup>2</sup>)-H Fluorination of Aromatic Ketones: Concise Access to Anacetrapib

Qiuzi Wu,<sup>†</sup> Yang-Jie Mao,<sup>†</sup> Kun Zhou, Shuang Wang, Lei Chen, Zhen-Yuan Xu, Shao-Jie Lou,<sup>\*</sup> and Dan-Qian Xu<sup>\*</sup>

Catalytic Hydrogenation Research Center, State Key Laboratory Breeding Base of Green Chemistry-Synthesis Technology, Key Laboratory of Green Pesticides and Cleaner Production Technology of Zhejiang Province, Zhejiang University of Technology, Hangzhou 310014, P. R. China.

## Table of Contents

|       |                                                                                                    |     |
|-------|----------------------------------------------------------------------------------------------------|-----|
| I.    | General.....                                                                                       | S2  |
| II.   | Optimization of the fluorination conditions.....                                                   | S3  |
| III.  | General conditions for the substrate scope research.....                                           | S6  |
| IV.   | Characterization of fluorination products.....                                                     | S6  |
| V.    | The application of direct <i>ortho</i> -C-H bond fluorination in the synthesis of Anacetrapib..... | S16 |
| VI.   | Experimental studies on the role of carbamate.....                                                 | S19 |
| VII.  | X-Ray data for <b>2e</b> and <b>2ab</b> .....                                                      | S21 |
| VIII. | References.....                                                                                    | S24 |
| IX.   | NMR Spectra.....                                                                                   | S25 |

## I. General

All experiments were carried out under air atmosphere unless specified noted. The reagents and solvents were purchased from commercial suppliers and used without further purification.  $^1\text{H}$  NMR and  $^{13}\text{C}$  NMR spectra were obtained on Bruker AVANCE III 600/500/400 instrument in  $\text{CDCl}_3$  using TMS as an internal standard, operating at 600/500/400 MHz and 126/101 MHz, respectively. Chemical shifts ( $\delta$ ) are expressed in ppm and coupling constants  $J$  are given in Hz. For  $\text{CDCl}_3$  solutions the chemical shifts are reported as parts per million (ppm) to residual protium or carbon of the solvents;  $\text{CHCl}_3$   $\delta\text{H}$  (7.26 ppm) and  $\text{CDCl}_3$   $\delta\text{C}$  (77.03 ppm);  $^{19}\text{F}$  NMR spectra were recorded on a Bruker AVANCE III or Ascend 400. Multiplicities are reported using the following abbreviations: s = singlet, d = doublet, t = triplet, q = quartet, dd = doublet of doublets, td = triplet of doublets, ddd = doublet of doublet of doublets, m = multiplet. GC experiments were carried out using Agilent 7890B GC. GC-MS experiments that used dodecane as an internal standard were performed with a Thermo DSQ II, Trace GC Ultra. High resolution mass spectra (HRMS (ESI-TOF)) were obtained on an Agilent 6545 Q-TOF LCMS spectrometer equipped with an ESI source or recorded in the EI mode on Waters GCT Premier TOF MS.

## II. Optimization of the fluorination conditions

**Table S1.** Optimizing the additive amount of NH<sub>2</sub>COOMe and AgNO<sub>3</sub><sup>a</sup>

| <div style="display: flex; align-items: center; justify-content: center;"> <div style="text-align: center;"> 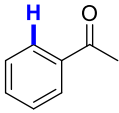 <p><b>1a</b></p> </div> <div style="margin: 0 20px; text-align: center;"> <math>\xrightarrow[\text{CH}_2\text{Cl}_2, 95^\circ\text{C}, 24\text{ h}]{\begin{array}{c} \text{Pd(OAc)}_2 (10\text{ mol}\%) \\ \text{NFSI} (2.5\text{ equiv.}) \\ \text{AgNO}_3 (x\text{ equiv.}) \\ \text{NH}_2\text{COOMe} (y\text{ equiv.}) \end{array}}</math> </div> <div style="display: flex; align-items: center;"> <div style="text-align: center;">  <p><b>2a</b></p> </div> <div style="margin: 0 10px;">+</div> <div style="text-align: center;">  <p><b>2a'</b></p> </div> </div> </div> |                       |                           |                              |                               |
|-------------------------------------------------------------------------------------------------------------------------------------------------------------------------------------------------------------------------------------------------------------------------------------------------------------------------------------------------------------------------------------------------------------------------------------------------------------------------------------------------------------------------------------------------------------------------------------------------------------------------------------------------------------------------------------------------------------------------------------------------------------------------------------------------------------------------------------------------------------------------------------------------------------------------------------------------------|-----------------------|---------------------------|------------------------------|-------------------------------|
| Entry                                                                                                                                                                                                                                                                                                                                                                                                                                                                                                                                                                                                                                                                                                                                                                                                                                                                                                                                                 | AgNO <sub>3</sub> (x) | NH <sub>2</sub> COOMe (y) | Yield of 2a [%] <sup>b</sup> | Yield of 2a' [%] <sup>b</sup> |
| 1                                                                                                                                                                                                                                                                                                                                                                                                                                                                                                                                                                                                                                                                                                                                                                                                                                                                                                                                                     | 0.3                   | 0.4                       | 34                           | 0                             |
| 2                                                                                                                                                                                                                                                                                                                                                                                                                                                                                                                                                                                                                                                                                                                                                                                                                                                                                                                                                     | 0.3                   | 0                         | 15                           | 0                             |
| 3                                                                                                                                                                                                                                                                                                                                                                                                                                                                                                                                                                                                                                                                                                                                                                                                                                                                                                                                                     | 0                     | 0.4                       | 14                           | 0                             |
| 4                                                                                                                                                                                                                                                                                                                                                                                                                                                                                                                                                                                                                                                                                                                                                                                                                                                                                                                                                     | 0                     | 0                         | 5                            | 0                             |
| 5                                                                                                                                                                                                                                                                                                                                                                                                                                                                                                                                                                                                                                                                                                                                                                                                                                                                                                                                                     | 0.3                   | 0.8                       | 38                           | 0                             |
| 6                                                                                                                                                                                                                                                                                                                                                                                                                                                                                                                                                                                                                                                                                                                                                                                                                                                                                                                                                     | 0.3                   | 0.2                       | 55                           | 0                             |
| <b>7</b>                                                                                                                                                                                                                                                                                                                                                                                                                                                                                                                                                                                                                                                                                                                                                                                                                                                                                                                                              | <b>0.5</b>            | <b>0.2</b>                | <b>85</b>                    | <b>trace</b>                  |
| 8                                                                                                                                                                                                                                                                                                                                                                                                                                                                                                                                                                                                                                                                                                                                                                                                                                                                                                                                                     | 0.5                   | 0.4                       | 44                           | 2                             |
| 9                                                                                                                                                                                                                                                                                                                                                                                                                                                                                                                                                                                                                                                                                                                                                                                                                                                                                                                                                     | 0.5                   | 0.8                       | 32                           | 12                            |
| <b>10</b>                                                                                                                                                                                                                                                                                                                                                                                                                                                                                                                                                                                                                                                                                                                                                                                                                                                                                                                                             | <b>0.75</b>           | <b>0.2</b>                | <b>83</b>                    | <b>5</b>                      |
| 11                                                                                                                                                                                                                                                                                                                                                                                                                                                                                                                                                                                                                                                                                                                                                                                                                                                                                                                                                    | 0.75                  | 0.4                       | 52                           | 4                             |
| 12                                                                                                                                                                                                                                                                                                                                                                                                                                                                                                                                                                                                                                                                                                                                                                                                                                                                                                                                                    | 0.75                  | 0.8                       | 50                           | 2                             |
| 13                                                                                                                                                                                                                                                                                                                                                                                                                                                                                                                                                                                                                                                                                                                                                                                                                                                                                                                                                    | 1.0                   | 0.2                       | 69                           | 5                             |
| 14                                                                                                                                                                                                                                                                                                                                                                                                                                                                                                                                                                                                                                                                                                                                                                                                                                                                                                                                                    | 1.0                   | 0.4                       | 56                           | 9                             |
| 15                                                                                                                                                                                                                                                                                                                                                                                                                                                                                                                                                                                                                                                                                                                                                                                                                                                                                                                                                    | 1.0                   | 0.8                       | 29                           | 31                            |
| 16 <sup>c</sup>                                                                                                                                                                                                                                                                                                                                                                                                                                                                                                                                                                                                                                                                                                                                                                                                                                                                                                                                       | 0.75                  | 0.2                       | 82                           | 2                             |
| 17 <sup>d</sup>                                                                                                                                                                                                                                                                                                                                                                                                                                                                                                                                                                                                                                                                                                                                                                                                                                                                                                                                       | 0.75                  | 0.2                       | 82                           | 3                             |
| 18 <sup>e</sup>                                                                                                                                                                                                                                                                                                                                                                                                                                                                                                                                                                                                                                                                                                                                                                                                                                                                                                                                       | 0.75                  | 0.2                       | 72                           | 0                             |
| 19 <sup>f</sup>                                                                                                                                                                                                                                                                                                                                                                                                                                                                                                                                                                                                                                                                                                                                                                                                                                                                                                                                       | 0.75                  | 0.2                       | 77                           | 0                             |
| 20 <sup>g</sup>                                                                                                                                                                                                                                                                                                                                                                                                                                                                                                                                                                                                                                                                                                                                                                                                                                                                                                                                       | 0.5                   | 0.2                       | 74                           | trace                         |

<sup>a</sup>Reaction conditions: **1a** (0.1 mmol), Pd(OAc)<sub>2</sub> (2.2 mg, 0.01 mmol), NFSI = N-fluorobenzenesulfonimide (78.8 mg, 0.25 mmol), AgNO<sub>3</sub> (x equiv.), NH<sub>2</sub>COOMe (y equiv.), CH<sub>2</sub>Cl<sub>2</sub> (1.0 mL) at 95 °C for 24 h, under air. <sup>b</sup>GC yield. <sup>c</sup>The reaction time is 12 h. <sup>d</sup>Pd(OAc)<sub>2</sub> (3.3 mg, 0.15 mmol). <sup>e</sup>NFSI (63.1 mg, 0.2 mmol). <sup>f</sup>75 °C, 12 h. <sup>g</sup>AgNO<sub>3</sub> (0.5 equiv.), 12 h.

**Table S2.** Screening of amide additives<sup>a</sup>

| 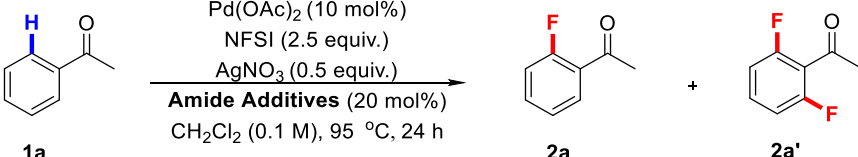 |                              |                              |                               |
|------------------------------------------------------------------------------------|------------------------------|------------------------------|-------------------------------|
| Entry                                                                              | Amide additives (0.2 equiv.) | Yield of 2a [%] <sup>b</sup> | Yield of 2a' [%] <sup>b</sup> |
| 1                                                                                  | Formamide                    | 0                            | 0                             |
| 2                                                                                  | Acetamide                    | 25                           | 0                             |
| 3                                                                                  | Methyl carbamate             | 85                           | trace                         |
| 4                                                                                  | Benzyl carbamate             | 68                           | 3                             |
| 5                                                                                  | tert-Butyl carbamate         | 10                           | 0                             |
| 6                                                                                  | Trifluoroacetamide           | 11                           | 0                             |
| 7                                                                                  | Benzamide                    | 8                            | 0                             |
| 8                                                                                  | Sulfamic acid                | 12                           | 0                             |

<sup>a</sup>Reaction conditions: **1a** (0.1 mmol), Pd(OAc)<sub>2</sub> (2.2 mg, 0.01 mmol), NFSI = N-fluorobenzenesulfonimide (78.8 mg, 0.25 mmol), AgNO<sub>3</sub> (8.5 mg, 0.05 mmol), amide additives (0.02 mmol), CH<sub>2</sub>Cl<sub>2</sub> (1.0 mL) at 95 °C for 24 h, under air. <sup>b</sup>GC yield.

**Table S3.** Screening of [Pd] catalysts<sup>a</sup>

| 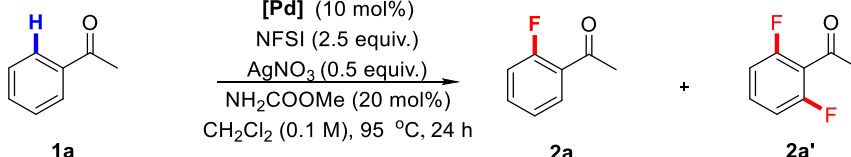 |                                                       |                              |                               |
|--------------------------------------------------------------------------------------|-------------------------------------------------------|------------------------------|-------------------------------|
| Entry                                                                                | [Pd] (10 mol%)                                        | Yield of 2a [%] <sup>b</sup> | Yield of 2a' [%] <sup>b</sup> |
| 1                                                                                    | -                                                     | 0                            | 0                             |
| 2                                                                                    | Pd(OAc) <sub>2</sub>                                  | 85                           | trace                         |
| 3                                                                                    | Pd(dba) <sub>2</sub>                                  | 56                           | 6                             |
| 4                                                                                    | Pd(TFA) <sub>2</sub>                                  | 59                           | 0                             |
| 5                                                                                    | [Pd(Cl)(C <sub>3</sub> H <sub>5</sub> )] <sub>2</sub> | 13                           | 0                             |
| 6                                                                                    | Pd(PPh <sub>3</sub> ) <sub>4</sub>                    | 49                           | 0                             |
| 7                                                                                    | PdCl <sub>2</sub> (cod)                               | 26                           | 4                             |
| 8                                                                                    | PdCl <sub>2</sub>                                     | 79                           | 3                             |

<sup>a</sup>Reaction conditions: **1a** (0.1 mmol), [Pd] (2.2 mg, 0.01 mmol), NFSI = N-fluorobenzenesulfonimide (78.8 mg, 0.25 mmol), AgNO<sub>3</sub> (8.5 mg, 0.05 mmol), NH<sub>2</sub>COOMe (1.5 mg, 0.02 mmol), CH<sub>2</sub>Cl<sub>2</sub> (1.0 mL) at 95 °C for 24 h, under air. <sup>b</sup>GC yield.

**Table S4.** Screening of additives<sup>a</sup>

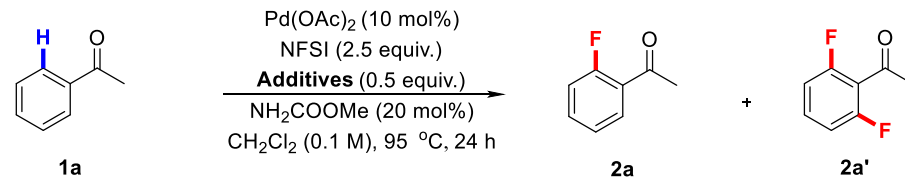

$\text{Pd(OAc)}_2$  (10 mol%)  
 $\text{NFSI}$  (2.5 equiv.)  
**Additives** (0.5 equiv.)  
 $\text{NH}_2\text{COOMe}$  (20 mol%)  
 $\text{CH}_2\text{Cl}_2$  (0.1 M), 95 °C, 24 h

**1a** **2a** **2a'**

| Entry | Additives                | Yield of <b>2a</b> [%] <sup>b</sup> | Yield of <b>2a'</b> [%] <sup>b</sup> |
|-------|--------------------------|-------------------------------------|--------------------------------------|
| 1     | $\text{AgNO}_2$          | 59                                  | 0                                    |
| 2     | $\text{KNO}_3$           | 56                                  | 0                                    |
| 3     | $\text{Ag}_2\text{CO}_3$ | 12                                  | 0                                    |
| 4     | $\text{AgNO}_3$          | 85                                  | trace                                |

<sup>a</sup>Reaction conditions: **1a** (0.1 mmol),  $\text{Pd(OAc)}_2$  (2.2 mg, 0.01 mmol), NFSI = N-fluorobenzenesulfonimide (1 mg, 0.25 mmol), additive (8.5 mg, 0.05 mmol),  $\text{NH}_2\text{COOMe}$  (1.5 mg, 0.02 mmol),  $\text{CH}_2\text{Cl}_2$  (1.0 mL) at 95 °C for 24 h, under air. <sup>b</sup>GC yield.

**Table S5.** Screening of solvents<sup>a</sup>

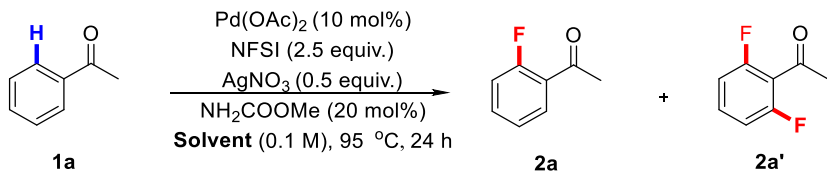

$\text{Pd(OAc)}_2$  (10 mol%)  
 $\text{NFSI}$  (2.5 equiv.)  
 $\text{AgNO}_3$  (0.5 equiv.)  
 $\text{NH}_2\text{COOMe}$  (20 mol%)  
**Solvent** (0.1 M), 95 °C, 24 h

**1a** **2a** **2a'**

| Entry | Solvents                 | Yield of <b>2a</b> [%] <sup>b</sup> | Yield of <b>2a'</b> [%] <sup>b</sup> |
|-------|--------------------------|-------------------------------------|--------------------------------------|
| 1     | $\text{CH}_2\text{Cl}_2$ | 85                                  | trace                                |
| 2     | DCE                      | 57                                  | 2                                    |
| 3     | acetone                  | 0                                   | 0                                    |
| 4     | toluene                  | 3                                   | 0                                    |
| 5     | DMF                      | 0                                   | 0                                    |
| 6     | 1,4-dioxane              | 0                                   | 0                                    |
| 7     | THF                      | 0                                   | 0                                    |
| 8     | $\text{CHCl}_3$          | 25                                  | 0                                    |
| 9     | $\text{CH}_3\text{CN}$   | 0                                   | 0                                    |
| 10    | EtOAc                    | 15                                  | 0                                    |

<sup>a</sup>Reaction conditions: **1a** (0.1 mmol),  $\text{Pd(OAc)}_2$  (2.2 mg, 0.01 mmol), NFSI = N-fluorobenzenesulfonimide (78.8 mg, 0.25 mmol),  $\text{AgNO}_3$  (8.5 mg, 0.05 mmol),  $\text{NH}_2\text{COOMe}$  (1.5 mg, 0.02 mmol), solvent (1.0 mL) at 95 °C for 24 h, under air. <sup>b</sup>GC yield.

**Table S6.** Screening of fluorination agents <sup>a</sup>

| Entry | [F <sup>+</sup> ] | Yield of 2a [%] <sup>b</sup> | Yield of 2a' [%] <sup>b</sup> |
|-------|-------------------|------------------------------|-------------------------------|
| 1     | A                 | 85                           | trace                         |
| 2     | B                 | 0                            | 0                             |
| 3     | C                 | 0                            | 0                             |
| 4     | D                 | 0                            | 0                             |

<sup>a</sup>Reaction conditions: **1a** (0.1 mmol), Pd(OAc)<sub>2</sub> (2.2 mg, 0.01 mmol), [F<sup>+</sup>] (0.25 mmol), AgNO<sub>3</sub> (8.5 mg, 0.05 mmol), NH<sub>2</sub>COOMe (1.5 mg, 0.02 mmol), CH<sub>2</sub>Cl<sub>2</sub> (1.0 mL) at 95 °C for 24 h, under air. <sup>b</sup>GC yield.

### III. General procedure for the substrate scope research

In a 10 mL test tube equipped with a stir bar, substrate (0.2 mmol), Pd(OAc)<sub>2</sub> (4.5 mg, 0.02 mmol), NFSI (158.0 mg, 0.5 mmol), AgNO<sub>3</sub> (16.9 mg, 0.1 mmol), NH<sub>2</sub>COOMe (3.0 mg, 0.04 mmol) and DCM (2.0 mL) were added successively. Then the tube was sealed and stirred at the 95 °C for 24 h. Upon completion, the resulting mixture was cooled to room temperature, diluted with DCM and concentrated under reduced pressure. The residue was purified by silica gel chromatography to afford the desired fluorinated products. (The products of **2a**, **2b**, **2g**, **2j**, **2k**, **2m**, **2n**, **2o**, **2q**, **2r**, **2s**, **2u** and **2x** require further purification by preparative thin-layer chromatography to afford the desired fluorinated products, and **2aa** should be further purified by recycling preparative HPLC (CH<sub>3</sub>CN: H<sub>2</sub>O=70: 30, 5.0 mL/min)).

### IV. Characterization of fluorination products

#### 1. Characterization of fluorination products

The products **2a**, **2b**, **2c**, **2i**, **2j**, **2k**, **2n**, **2o**, **2p**, **2r**, **2s**, **2v** and **2aa** are known compounds and commercially available. The spectral data of products, **2d**, **2e**, **2h**, **2z** and **2ab** are consistent with those of previous reports.<sup>1-5</sup>

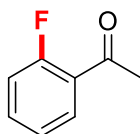

**1-(2-fluorophenyl)ethan-1-one (2a):** Following the general condition, AgNO<sub>3</sub> (0.15 mmol) was added and the reaction time was 12 h; Colorless oil (22.6 mg, 82%);  $R_f = 0.23$  (petroleum ether-EtOAc = 20:1);  $^1\text{H NMR}$  (500 MHz, CDCl<sub>3</sub>)  $\delta$  7.89 (td,  $J = 7.7, 1.8$  Hz, 1H), 7.56-7.51 (m, 1H), 7.26-7.21 (m, 1H), 7.15 (dd,  $J = 11.6, 7.9$  Hz, 1H), 2.66 (d,  $J = 4.9$  Hz, 3H);  $^{13}\text{C NMR}$  (126 MHz, CDCl<sub>3</sub>)  $\delta$  196.0 (d,  $J = 3.3$  Hz), 162.3 (d,  $J = 254.9$  Hz), 134.7 (d,  $J = 9.0$  Hz), 130.6 (d,  $J = 2.3$  Hz), 125.7 (d,  $J = 12.8$  Hz), 124.4 (d,  $J = 3.4$  Hz), 116.7 (d,  $J = 23.8$  Hz), 31.5 (d,  $J = 7.3$  Hz);  $^{19}\text{F NMR}$  (471 MHz, CDCl<sub>3</sub>)  $\delta$  -109.40 (s, 1F); **HRMS** (EI): [M<sup>+</sup>] calcd. for C<sub>8</sub>H<sub>7</sub>FO, 138.0481; found 138.0487.

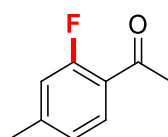

**1-(2-fluoro-4-methylphenyl)ethan-1-one (2b):** Following the general condition, AgNO<sub>3</sub> (0.15 mmol) was added and the reaction time was 12 h; Colorless oil (27.1 mg, 89%);  $R_f = 0.33$  (petroleum ether-EtOAc = 20:1);  $^1\text{H NMR}$  (500 MHz, CDCl<sub>3</sub>)  $\delta$  7.79 (t,  $J = 8.0$  Hz, 1H), 7.03 (d,  $J = 8.0$  Hz, 1H), 6.95 (d,  $J = 12.2$  Hz, 1H), 2.63 (d,  $J = 4.9$  Hz, 3H), 2.41 (s, 3H);  $^{13}\text{C NMR}$  (126 MHz, CDCl<sub>3</sub>)  $\delta$  195.6 (d,  $J = 31.25$  Hz), 162.32 (d,  $J = 254.7$  Hz), 146.4 (d,  $J = 9.1$  Hz), 130.4 (d,  $J = 2.8$  Hz), 125.2 (d,  $J = 2.8$  Hz), 123.0 (d,  $J = 12.8$  Hz), 117.0 (d,  $J = 23.7$  Hz), 31.4 (d,  $J = 7.5$  Hz), 21.4 (d,  $J = 1.2$  Hz);  $^{19}\text{F NMR}$  (471 MHz, CDCl<sub>3</sub>)  $\delta$  -109.98 (s, 1F); **HRMS** (EI): [M<sup>+</sup>] calcd. for C<sub>9</sub>H<sub>9</sub>FO, 152.0637; found 152.0644.

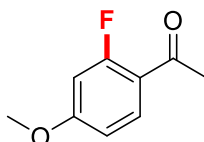

**1-(2-fluoro-4-methoxyphenyl)ethan-1-one (2c):** Following the general condition, AgNO<sub>3</sub> (0.15 mmol) was added; Colorless solid (26.2 mg, 78%);  $R_f = 0.25$  (petroleum ether-EtOAc = 20:1);  $^1\text{H NMR}$  (500 MHz, CDCl<sub>3</sub>)  $\delta$  7.90 (t,  $J = 8.8$  Hz, 1H), 6.76 (dd,  $J = 8.9, 2.4$  Hz, 1H), 6.63 (dd,  $J = 13.1, 2.4$  Hz, 1H), 3.87 (s, 3H), 2.61 (d,  $J = 5.2$  Hz, 3H);  $^{13}\text{C NMR}$  (126 MHz, CDCl<sub>3</sub>)  $\delta$  194.5 (d,  $J = 4.0$  Hz), 164.9 (d,  $J = 1.7$  Hz), 163.8 (d,  $J = 245.5$  Hz), 132.1 (d,  $J = 4.4$  Hz), 118.6 (d,  $J = 12.9$  Hz), 110.7 (d,  $J = 2.4$  Hz), 101.7 (d,  $J = 27.7$  Hz), 55.9, 31.2 (d,  $J = 7.8$  Hz);  $^{19}\text{F NMR}$  (471 MHz, CDCl<sub>3</sub>)  $\delta$  -105.78 (s, 1F); **HRMS** (EI): [M<sup>+</sup>] calcd. for C<sub>9</sub>H<sub>9</sub>FO<sub>2</sub>, 168.0587; found 168.0595.

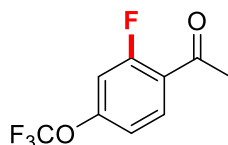

**1-(2-fluoro-4-(trifluoromethoxy)phenyl)ethan-1-one (2d):** Following the general condition, AgNO<sub>3</sub> (0.15 mmol) was added; Colorless solid (26.7 mg, 60%);  $R_f = 0.42$  (petroleum ether-EtOAc = 5:1);  $^1\text{H}$

**NMR** (500 MHz, CDCl<sub>3</sub>)  $\delta$  7.98 (t,  $J$  = 8.5 Hz, 1H), 7.11 (d,  $J$  = 7.8 Hz, 1H), 7.04 (d,  $J$  = 11.2 Hz, 1H), 2.66 (d,  $J$  = 5.0 Hz, 3H); **<sup>13</sup>C NMR** (126 MHz, CDCl<sub>3</sub>)  $\delta$  194.2 (d,  $J$  = 3.9 Hz), 162.5 (d,  $J$  = 257.1 Hz), 153.1 (dd,  $J$  = 11.3, 2.0 Hz), 132.5-131.8 (m), 123.9 (d,  $J$  = 13.1 Hz), 120.2 (q,  $J$  = 257.1 Hz), 116.3-116.2 (m), 109.0 (d,  $J$  = 27.4 Hz), 31.4 (d,  $J$  = 7.4 Hz); **<sup>19</sup>F NMR** (471 MHz, CDCl<sub>3</sub>)  $\delta$  -57.81 (s, 3F), -105.08 (s, 1F); **HRMS** (EI): [M<sup>+</sup>] calcd. for C<sub>9</sub>H<sub>6</sub>F<sub>4</sub>O<sub>2</sub>, 222.0304; found 222.0315.

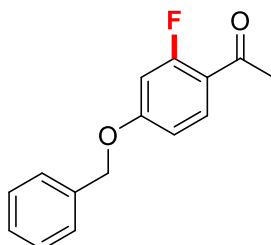

**1-(4-(benzyloxy)-2-fluorophenyl)ethan-1-one (2e):** Following the general condition, AgNO<sub>3</sub> (0.15 mmol) was added; Difluorination product has also been determined by GC-MS (3%); Colorless solid (36.6 mg, 75%);  $R_f$  = 0.50 (petroleum ether-EtOAc = 5:1); **<sup>1</sup>H NMR** (500 MHz, CDCl<sub>3</sub>)  $\delta$  7.90 (t,  $J$  = 8.8 Hz, 1H), 7.45-7.40 (m, 4H), 7.39-7.36 (m, 1H), 6.84 (dd,  $J$  = 8.8, 2.4 Hz, 1H), 6.71 (dd,  $J$  = 13.0, 2.4 Hz, 1H), 5.13 (s, 2H), 2.61 (d,  $J$  = 5.1 Hz, 3H); **<sup>13</sup>C NMR** (126 MHz, CDCl<sub>3</sub>)  $\delta$  194.6 (d,  $J$  = 3.8 Hz), 164.0 (d,  $J$  = 11.7 Hz), 163.8 (d,  $J$  = 255.4 Hz), 135.7, 132.2 (d,  $J$  = 4.3 Hz), 128.8, 128.5, 127.5, 118.9 (d,  $J$  = 12.9 Hz), 111.4 (d,  $J$  = 2.7 Hz), 102.7 (d,  $J$  = 27.7 Hz), 70.6, 31.3 (d,  $J$  = 7.7 Hz); **<sup>19</sup>F NMR** (471 MHz, CDCl<sub>3</sub>)  $\delta$  -105.71 (s, 1F); **HRMS** (EI): [M<sup>+</sup>] calcd. for C<sub>15</sub>H<sub>13</sub>FO<sub>2</sub>, 244.0900; found 244.0907.

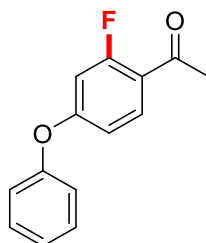

**1-(2-fluoro-4-phenoxyphenyl)ethan-1-one (2f):** Following the general condition, AgNO<sub>3</sub> (0.15 mmol) was added; Difluorination product has also been determined by GC-MS (4%); Colorless solid (23.9 mg, 52%);  $R_f$  = 0.29 (petroleum ether-EtOAc = 20:1); **<sup>1</sup>H NMR** (500 MHz, CDCl<sub>3</sub>)  $\delta$  7.88 (t,  $J$  = 8.7 Hz, 1H), 7.45-7.39 (m, 2H), 7.26-7.22 (m, 1H), 7.09 (dd,  $J$  = 8.6, 1.0 Hz, 2H), 6.80 (dd,  $J$  = 8.8, 2.3 Hz, 1H), 6.65 (dd,  $J$  = 12.6, 2.3 Hz, 1H), 2.60 (d,  $J$  = 5.1 Hz, 3H); **<sup>13</sup>C NMR** (126 MHz, CDCl<sub>3</sub>)  $\delta$  194.5 (d,  $J$  = 3.8 Hz), 163.6 (d,  $J$  = 256.0 Hz), 163.4 (d,  $J$  = 11.5 Hz), 154.8, 132.3 (d,  $J$  = 4.1 Hz), 130.3, 125.3, 120.6, 120.1 (d,  $J$  = 13.0 Hz), 113.4 (d,  $J$  = 2.8 Hz), 105.1 (d,  $J$  = 27.8 Hz), 31.3 (d,  $J$  = 7.6 Hz); **<sup>19</sup>F NMR** (471 MHz, CDCl<sub>3</sub>)  $\delta$  -105.54 (s, 1F); **HRMS** (EI): [M<sup>+</sup>] calcd. for C<sub>14</sub>H<sub>11</sub>FO<sub>2</sub>, 230.0743; found 230.0748.



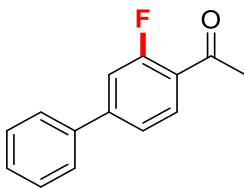

**1-(3-fluoro-[1,1'-biphenyl]-4-yl)ethan-1-one (2g):** Difluorination product has also been determined by GC-MS (14%); Colorless solid (39.5 mg, 82%);  $R_f = 0.40$  (petroleum ether-EtOAc = 10:1);  $^1\text{H NMR}$  (500 MHz,  $\text{CDCl}_3$ )  $\delta$  7.98 (t,  $J = 8.0$  Hz, 1H), 7.65-7.61 (m, 2H), 7.52-7.43 (m, 4H), 7.38 (dd,  $J = 12.4, 1.7$  Hz, 1H), 2.70 (d,  $J = 4.9$  Hz, 3H);  $^{13}\text{C NMR}$  (126 MHz,  $\text{CDCl}_3$ )  $\delta$  195.4 (d,  $J = 3.5$  Hz), 162.6 (d,  $J = 254.8$  Hz), 148.0 (d,  $J = 8.8$  Hz), 138.6, 131.1 (d,  $J = 3.1$  Hz), 129.0, 128.8, 127.1, 124.1 (d,  $J = 13.1$  Hz), 122.9 (d,  $J = 2.9$  Hz), 114.9 (d,  $J = 24.9$  Hz), 31.4 (d,  $J = 7.4$  Hz);  $^{19}\text{F NMR}$  (471 MHz,  $\text{CDCl}_3$ )  $\delta$  -108.93 (s, 1F); **HRMS** (EI):  $[\text{M}^+]$  calcd. for  $\text{C}_{14}\text{H}_{11}\text{FO}$ , 214.0794; found 214.0804. (*It contains minor di-fluorination product, which was difficult to be separated from the mono-fluorination product.*)

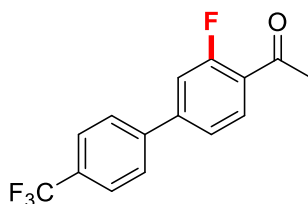

**1-(3-fluoro-4'-(trifluoromethyl)-[1,1'-biphenyl]-4-yl)ethan-1-one (2h):** Difluorination product has also been determined by GC-MS (6%); Colorless solid (42.9 mg, 76%);  $R_f = 0.52$  (petroleum ether-EtOAc = 5:1);  $^1\text{H NMR}$  (500 MHz,  $\text{CDCl}_3$ )  $\delta$  8.00 (t,  $J = 7.9$  Hz, 1H), 7.78-7.70 (m, 4H), 7.48 (dd,  $J = 8.1, 1.7$  Hz, 1H), 7.39 (dd,  $J = 12.1, 1.6$  Hz, 1H), 2.70 (d,  $J = 4.9$  Hz, 3H);  $^{13}\text{C NMR}$  (126 MHz,  $\text{CDCl}_3$ )  $\delta$  195.3 (d,  $J = 3.5$  Hz), 162.5 (d,  $J = 255.4$  Hz), 146.3 (d,  $J = 8.7$  Hz), 142.1, 131.4 (d,  $J = 3.0$  Hz), 130.8 (q,  $J = 32.6$  Hz), 127.6, 126.0 (q,  $J = 3.7$  Hz), 124.9 (d,  $J = 13.1$  Hz), 123.1 (d,  $J = 3.1$  Hz), 115.3 (d,  $J = 25.2$  Hz), 111.0 (d,  $J = 26.8$  Hz), 31.4;  $^{19}\text{F NMR}$  (376 MHz,  $\text{CDCl}_3$ )  $\delta$  -62.65 (s, 3F), -108.54 (s, 1F); **HRMS** (EI):  $[\text{M}^+]$  calcd. for  $\text{C}_{15}\text{H}_{10}\text{F}_4\text{O}$ , 282.0668; found 282.0664. (*It contains a minor di-fluorination product, which was difficult to be separated from the mono-fluorination product.*)

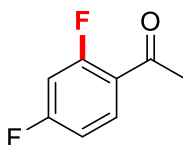

**1-(2,4-difluorophenyl)ethan-1-one (2i):** Colorless solid (21.2 mg, 68%);  $R_f = 0.18$  (petroleum ether-EtOAc = 20:1);  $^1\text{H NMR}$  (500 MHz,  $\text{CDCl}_3$ )  $\delta$  7.96 (td,  $J = 8.7, 6.7$  Hz, 1H), 7.01-6.93 (m, 1H), 6.92-6.86 (m, 1H), 2.64 (d,  $J = 5.2$  Hz, 3H);  $^{13}\text{C NMR}$  (126 MHz,  $\text{CDCl}_3$ )  $\delta$  194.3 (d,  $J = 3.7$  Hz), 167.0-164.8 (m), 164.1-161.9 (m), 132.6 (dd,  $J = 10.6, 4.0$  Hz), 122.3 (d,  $J = 3.4$  Hz), 112.2 (dd,  $J = 21.4, 3.4$  Hz), 104.7 (dd,  $J = 27.7, 25.4$  Hz), 31.3 (d,  $J = 7.5$  Hz);  $^{19}\text{F NMR}$  (471 MHz,  $\text{CDCl}_3$ )  $\delta$  -101.90 (s, 1F), -104.44 (s, 1F); **HRMS** (EI):  $[\text{M}^+]$  calcd. for  $\text{C}_8\text{H}_6\text{F}_2\text{O}$ , 156.0387; found 156.0391.

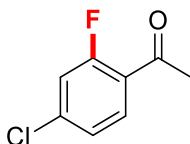

**1-(4-chloro-2-fluorophenyl)ethan-1-one (2j):** Difluorination product has also been determined by GC-MS (3%); Yellow solid (23.0 mg, 67%);  $R_f = 0.29$  (petroleum ether-EtOAc = 20:1);  $^1\text{H NMR}$  (500 MHz,  $\text{CDCl}_3$ )  $\delta$  7.86 (t,  $J = 8.2$  Hz, 1H), 7.26-7.15 (m, 2H), 2.64 (d,  $J = 5.1$  Hz, 3H);  $^{13}\text{C NMR}$  (126 MHz,  $\text{CDCl}_3$ )  $\delta$  194.5, 162.0 (d,  $J = 258.3$  Hz), 140.2 (d,  $J = 10.6$  Hz), 131.7 (d,  $J = 3.4$  Hz), 125.9 (d,  $J = 3.4$  Hz), 124.1 (d,  $J = 13.0$  Hz), 117.4 (d,  $J = 27.5$  Hz), 31.4 (d,  $J = 7.4$  Hz);  $^{19}\text{F NMR}$  (471 MHz,  $\text{CDCl}_3$ )  $\delta$  -107.0 (s, 1F); **HRMS** (EI):  $[\text{M}^+]$  calcd. for  $\text{C}_8\text{H}_6\text{ClFO}$ , 172.0091; found 172.0100.

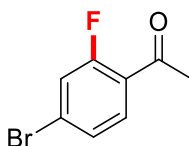

**1-(4-bromo-2-fluorophenyl)ethan-1-one (2k):** Colorless oil (29.8 mg, 69%);  $R_f = 0.49$  (petroleum ether-EtOAc = 20:1);  $^1\text{H NMR}$  (500 MHz,  $\text{CDCl}_3$ )  $\delta$  7.78 (t,  $J = 8.2$  Hz, 1H), 7.43-7.31 (m, 2H), 2.64 (d,  $J = 5.0$  Hz, 3H);  $^{13}\text{C NMR}$  (126 MHz,  $\text{CDCl}_3$ )  $\delta$  194.7 (d,  $J = 3.6$  Hz), 161.8 (d,  $J = 259.2$  Hz), 131.8 (d,  $J = 3.1$  Hz), 128.2 (d,  $J = 9.8$  Hz), 128.0 (d,  $J = 3.5$  Hz), 124.6 (d,  $J = 12.9$  Hz), 120.3 (d,  $J = 27.2$  Hz), 31.4 (d,  $J = 7.4$  Hz);  $^{19}\text{F NMR}$  (471 MHz,  $\text{CDCl}_3$ )  $\delta$  -107.15 (s, 1F); **HRMS** (EI):  $[\text{M}^+]$  calcd. for  $\text{C}_8\text{H}_6\text{BrFO}$ , 215.9586; found 230.9595.

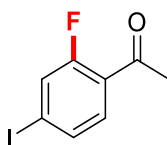

**1-(2-fluoro-4-iodophenyl)ethan-1-one (2l):** Difluorination product has also been determined by GC-MS (5%); Colorless solid (39.6 mg, 75%);  $R_f = 0.46$  (petroleum ether-EtOAc = 20:1);  $^1\text{H NMR}$  (500 MHz,  $\text{CDCl}_3$ )  $\delta$  7.86 (t,  $J = 8.2$  Hz, 1H), 7.26-7.16 (m, 2H), 2.64 (d,  $J = 5.0$  Hz, 3H);  $^{13}\text{C NMR}$  (126 MHz,  $\text{CDCl}_3$ )  $\delta$  194.5 (d,  $J = 3.6$  Hz), 162.1 (d,  $J = 261.25$  Hz), 140.2 (d,  $J = 10.6$  Hz), 131.7 (d,  $J = 3.4$  Hz), 125.1 (d,  $J = 3.4$  Hz), 124.1 (d,  $J = 12.5$  Hz), 117.4 (d,  $J = 27.4$  Hz), 31.4 (d,  $J = 7.4$  Hz);  $^{19}\text{F NMR}$  (471 MHz,  $\text{CDCl}_3$ )  $\delta$  -107.51 (s, 1F); **HRMS** (EI):  $[\text{M}^+]$  calcd. for  $\text{C}_8\text{H}_6\text{FIO}$ , 263.9447; found 263.9436.

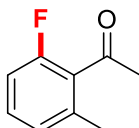

**1-(2-fluoro-6-methylphenyl)ethan-1-one (2m):** Following the general condition,  $\text{AgNO}_3$  (0.15 mmol) was added and the reaction time was 12 h; Colorless oil (24.3 mg, 80%);  $R_f = 0.33$  (petroleum ether-EtOAc = 20:1);  $^1\text{H NMR}$  (500 MHz,  $\text{CDCl}_3$ )  $\delta$  7.27 (td,  $J = 8.1, 6.0$  Hz, 1H), 7.01 (d,  $J = 7.6$  Hz, 1H), 6.94 (t, 1H), 2.57 (d,  $J = 3.0$  Hz, 3H), 2.35 (s, 3H);  $^{13}\text{C NMR}$  (126 MHz,  $\text{CDCl}_3$ )  $\delta$  201.2, 160.2

(d,  $J = 247.2$  Hz), 138.1 (d,  $J = 3.5$  Hz), 131.0 (d,  $J = 9.3$  Hz), 128.6 (d,  $J = 16.2$  Hz), 126.7 (d,  $J = 2.8$  Hz), 113.2 (d,  $J = 22.6$  Hz), 32.5 (d,  $J = 4.4$  Hz), 19.6 (d,  $J = 2.3$  Hz);  **$^{19}\text{F}$  NMR** (471 MHz,  $\text{CDCl}_3$ )  $\delta$  -114.78 (s, 1F); **HRMS** (EI):  $[\text{M}^+]$  calcd. for  $\text{C}_9\text{H}_9\text{FO}$ , 152.0637; found 152.0646.

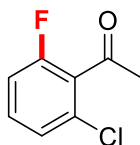

**1-(2-chloro-6-fluorophenyl)ethan-1-one (2n):** Colorless oil (21.3 mg, 62%);  $R_f = 0.42$  (petroleum ether-EtOAc = 20:1);  **$^1\text{H}$  NMR** (500 MHz,  $\text{CDCl}_3$ )  $\delta$  7.32 (td,  $J = 8.2, 6.1$  Hz, 1H), 7.22 (d,  $J = 8.1$  Hz, 1H), 7.07-7.02 (m, 1H), 2.59 (d,  $J = 1.2$  Hz, 3H);  **$^{13}\text{C}$  NMR** (126 MHz,  $\text{CDCl}_3$ )  $\delta$  197.7, 159.1 (d,  $J = 250.5$  Hz), 131.1 (d,  $J = 9.2$  Hz), 130.8 (d,  $J = 6.0$  Hz), 129.3 (d,  $J = 21.5$  Hz), 125.8 (d,  $J = 3.4$  Hz), 114.5 (d,  $J = 21.9$  Hz), 32.0 (d,  $J = 1.5$  Hz);  **$^{19}\text{F}$  NMR** (471 MHz,  $\text{CDCl}_3$ )  $\delta$  -114.05 (s, 1F); **HRMS** (EI):  $[\text{M}^+]$  calcd. for  $\text{C}_8\text{H}_6\text{ClFO}$ , 172.0091; found 172.0101.

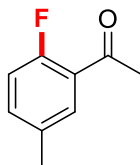

**1-(2-fluoro-5-methylphenyl)ethan-1-one (2o):** Following the general condition,  $\text{AgNO}_3$  (0.15 mmol) was added and the reaction time was 12 h; Colorless oil (26.8 mg, 88%);  $R_f = 0.42$  (petroleum ether-EtOAc = 20:1);  **$^1\text{H}$  NMR** (500 MHz,  $\text{CDCl}_3$ )  $\delta$  7.66 (dd,  $J = 7.1, 2.0$  Hz, 1H), 7.33-7.21 (m, 1H), 7.02 (dd,  $J = 10.9, 8.4$  Hz, 1H), 2.64 (d,  $J = 4.9$  Hz, 3H), 2.35 (s, 3H);  **$^{13}\text{C}$  NMR** (126 MHz,  $\text{CDCl}_3$ )  $\delta$  196.2 (d,  $J = 3.4$  Hz), 160.6 (d,  $J = 252.3$  Hz), 135.2 (d,  $J = 8.7$  Hz), 133.9 (d,  $J = 3.4$  Hz), 130.5 (d,  $J = 2.3$  Hz), 125.2 (d,  $J = 12.9$  Hz), 116.4 (d,  $J = 24.0$  Hz), 53.4, 31.4 (d,  $J = 7.5$  Hz);  **$^{19}\text{F}$  NMR** (471 MHz,  $\text{CDCl}_3$ )  $\delta$  -114.55 (s, 1F); **HRMS** (EI):  $[\text{M}^+]$  calcd. for  $\text{C}_9\text{H}_9\text{FO}$ , 152.0637; found 152.0642.

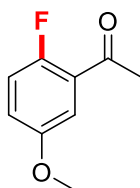

**1-(2-fluoro-5-methoxyphenyl)ethan-1-one (2p):** Following the general condition,  $\text{AgNO}_3$  (0.15 mmol) was added; Colorless solid (17.8 mg, 53%);  $R_f = 0.31$  (petroleum ether-EtOAc = 20:1);  **$^1\text{H}$  NMR** (500 MHz,  $\text{CDCl}_3$ )  $\delta$  7.36-7.34 (m, 2.1 Hz, 1H), 7.07 (d,  $J = 2.6$  Hz, 1H), 7.06 (d,  $J = 1.8$  Hz, 1H), 3.83 (s, 3H), 2.65 (d,  $J = 5.2$  Hz, 3H);  **$^{13}\text{C}$  NMR** (126 MHz,  $\text{CDCl}_3$ )  $\delta$  195.7 (d,  $J = 3.8$  Hz), 156.9 (d,  $J = 247.9$  Hz), 155.7 (d,  $J = 1.7$  Hz), 125.7 (d,  $J = 14.5$  Hz), 121.7 (d,  $J = 8.7$  Hz), 117.6 (d,  $J = 26.3$  Hz), 112.7 (d,  $J = 2.6$  Hz), 55.9, 31.4 (d,  $J = 8.1$  Hz);  **$^{19}\text{F}$  NMR** (471 MHz,  $\text{CDCl}_3$ )  $\delta$  -119.42 (s, 1F); **HRMS** (EI):  $[\text{M}^+]$  calcd. for  $\text{C}_9\text{H}_9\text{FO}_2$ , 168.0587; found 168.0593.

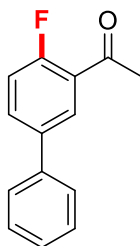

**1-(4-fluoro-[1,1'-biphenyl]-3-yl)ethan-1-one (2q):** Difluorination product has also been determined by GC-MS (4%); Colorless solid (32.5 mg, 76%);  $R_f = 0.41$  (petroleum ether-EtOAc = 20:1);  $^1\text{H NMR}$  (500 MHz,  $\text{CDCl}_3$ )  $\delta$  8.11 (dd,  $J = 7.0, 2.5$  Hz, 1H), 7.77-7.73 (m, 1H), 7.59 (d,  $J = 7.2$  Hz, 2H), 7.47 (t,  $J = 7.6$  Hz, 2H), 7.39 (t,  $J = 7.4$  Hz, 1H), 7.23 (dd,  $J = 10.7, 8.6$  Hz, 1H), 2.71 (d,  $J = 5.0$  Hz, 3H);  $^{13}\text{C NMR}$  (126 MHz,  $\text{CDCl}_3$ )  $\delta$  195.9 (d,  $J = 3.5$  Hz), 161.8 (d,  $J = 255.3$  Hz), 139.1, 137.7 (d,  $J = 3.4$  Hz), 133.1 (d,  $J = 9.0$  Hz), 129.0 (d,  $J = 2.6$  Hz), 128.9, 127.8, 127.0, 125.7 (d,  $J = 13.3$  Hz), 117.1 (d,  $J = 24.3$  Hz), 31.2 (d,  $J = 7.5$  Hz);  $^{19}\text{F NMR}$  (471 MHz,  $\text{CDCl}_3$ )  $\delta$  -112.19 (s, 1F); **HRMS** (EI):  $[M^+]$  calcd. for  $\text{C}_{14}\text{H}_{11}\text{FO}$ , 214.0794; found 214.0802.

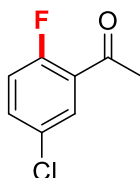

**1-(5-chloro-2-fluorophenyl)ethan-1-one (2r):** Colorless oil (24.1 mg, 70%);  $R_f = 0.33$  (petroleum ether-EtOAc = 20:1);  $^1\text{H NMR}$  (500 MHz,  $\text{CDCl}_3$ )  $\delta$  7.85 (dd,  $J = 6.2, 2.8$  Hz, 1H), 7.50-7.47 (m, 1H), 7.12 (dd,  $J = 10.2, 8.8$  Hz, 1H), 2.65 (d,  $J = 5.0$  Hz, 3H);  $^{13}\text{C NMR}$  (126 MHz,  $\text{CDCl}_3$ )  $\delta$  194.5, 160.6 (d,  $J = 254.7$  Hz), 134.4 (d,  $J = 9.2$  Hz), 130.2 (d,  $J = 2.8$  Hz), 130.0 (d,  $J = 3.2$  Hz), 126.7 (d,  $J = 14.7$  Hz), 118.3 (d,  $J = 26.0$  Hz), 31.3 (d,  $J = 7.5$  Hz);  $^{19}\text{F NMR}$  (471 MHz,  $\text{CDCl}_3$ )  $\delta$  -112.30 (s, 1F); **HRMS** (EI):  $[M^+]$  calcd. for  $\text{C}_8\text{H}_6\text{ClFO}$ , 172.0091; found 172.0092.

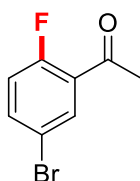

**1-(5-bromo-2-fluorophenyl)ethan-1-one (2s):** Colorless solid (26.4 mg, 61%);  $R_f = 0.42$  (petroleum ether-EtOAc = 20:1);  $^1\text{H NMR}$  (500 MHz,  $\text{CDCl}_3$ )  $\delta$  7.99 (dd,  $J = 6.4, 2.6$  Hz, 1H), 7.63-7.60 (m, 1H), 7.06 (dd,  $J = 10.4, 8.7$  Hz, 1H), 2.64 (d,  $J = 4.9$  Hz, 3H);  $^{13}\text{C NMR}$  (126 MHz,  $\text{CDCl}_3$ )  $\delta$  194.4 (d,  $J = 3.7$  Hz), 161.2 (d,  $J = 255.2$  Hz), 137.3 (d,  $J = 9.1$  Hz), 133.3 (d,  $J = 2.4$  Hz), 127.1 (d,  $J = 14.4$  Hz), 118.7 (d,  $J = 25.5$  Hz), 117.3 (d,  $J = 3.0$  Hz), 31.3 (d,  $J = 7.5$  Hz);  $^{19}\text{F NMR}$  (471 MHz,  $\text{CDCl}_3$ )  $\delta$  -111.78 (s, 1F); **HRMS** (EI):  $[M^+]$  calcd. for  $\text{C}_8\text{H}_6\text{BrFO}$ , 215.9586; found 215.9592.

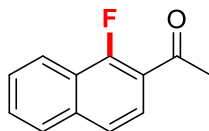

**1-(1-fluoronaphthalen-2-yl)ethan-1-one (2t):** Difluorination product has also been determined by GC-MS (6%); Colorless solid (30.5 mg, 81%);  $R_f = 0.31$  (petroleum ether-EtOAc = 20:1);  $^1\text{H NMR}$  (500 MHz,  $\text{CDCl}_3$ )  $\delta$  8.43 (d,  $J = 7.4$  Hz, 1H), 7.96 (d,  $J = 8.2$  Hz, 1H), 7.81 (d,  $J = 8.2$  Hz, 1H), 7.64-7.58 (m, 1H), 7.56-7.49 (m, 2H), 2.75 (d, 3H);  $^{13}\text{C NMR}$  (126 MHz,  $\text{CDCl}_3$ )  $\delta$  196.2 (d,  $J = 3.6$  Hz), 158.8 (d,  $J = 251.7$  Hz), 136.2 (d,  $J = 9.6$  Hz), 132.6 (d,  $J = 3.7$  Hz), 129.7, 129.7, 129.2, 126.9 (d,  $J = 5.1$  Hz), 126.3, 126.1 (d,  $J = 2.5$  Hz), 112.5 (d,  $J = 23.1$  Hz), 31.4 (d,  $J = 7.3$  Hz);  $^{19}\text{F NMR}$  (471 MHz,  $\text{CDCl}_3$ )  $\delta$  -114.96 (s, 1F); **HRMS** (EI):  $[\text{M}^+]$  calcd. for  $\text{C}_{12}\text{H}_9\text{FO}$ , 188.0637; found 188.0644.

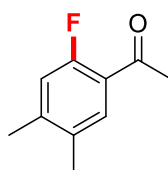

**1-(2-fluoro-4,5-dimethylphenyl)ethan-1-one (2u):** Colorless oil (30.2 mg, 91%);  $R_f = 0.33$  (petroleum ether-EtOAc = 20:1);  $^1\text{H NMR}$  (500 MHz,  $\text{CDCl}_3$ )  $\delta$  7.63 (d,  $J = 7.7$  Hz, 1H), 6.91 (d,  $J = 11.8$  Hz, 1H), 2.61 (d,  $J = 4.9$  Hz, 3H), 2.29 (s, 3H), 2.25 (s, 3H);  $^{13}\text{C NMR}$  (126 MHz,  $\text{CDCl}_3$ )  $\delta$  195.8 (d,  $J = 3.6$  Hz), 160.6 (d,  $J = 252.6$  Hz), 144.8 (d,  $J = 8.7$  Hz), 132.7 (d,  $J = 3.0$  Hz), 130.9 (d,  $J = 2.5$  Hz), 122.8 (d,  $J = 12.4$  Hz), 117.3 (d,  $J = 23.8$  Hz), 31.4 (d,  $J = 7.5$  Hz), 20.0, 18.8;  $^{19}\text{F NMR}$  (376 MHz,  $\text{CDCl}_3$ )  $\delta$  -114.20 (s, 1F); **HRMS** (EI):  $[\text{M}^+]$  calcd. for  $\text{C}_{10}\text{H}_{11}\text{FO}$ , 166.0794; found 166.0803.

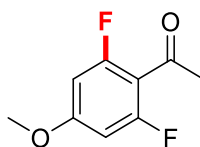

**1-(2,6-difluoro-4-methoxyphenyl)ethan-1-one (2v):** Colorless solid (34.6 mg, 93%);  $R_f = 0.41$  (petroleum ether-EtOAc = 10:1);  $^1\text{H NMR}$  (500 MHz,  $\text{CDCl}_3$ )  $\delta$  6.51-6.43 (m, 2H), 3.84 (s, 3H), 2.57 (t,  $J = 2.3$  Hz, 3H);  $^{13}\text{C NMR}$  (126 MHz,  $\text{CDCl}_3$ )  $\delta$  193.7, 163.4-163.1 (m), 162.2 (d,  $J = 254.6$  Hz), 162.1 (d,  $J = 254.6$  Hz), 111.0-110.7 (m), 98.6 (d,  $J = 18.3$ ), 98.6 (dd,  $J = 28.7, 1.5$  Hz), 56.0, 32.5;  $^{19}\text{F NMR}$  (376 MHz,  $\text{CDCl}_3$ )  $\delta$  -109.05 (s, 2F); **HRMS** (EI):  $[\text{M}^+]$  calcd. for  $\text{C}_9\text{H}_8\text{F}_2\text{O}_2$ , 186.0492; found 186.0498.

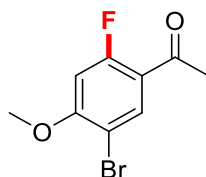

**1-(5-bromo-2-fluoro-4-methoxyphenyl)ethan-1-one (2w):** Colorless solid (38.4 mg, 78%);  $R_f = 0.50$  (petroleum ether-EtOAc = 10:1);  $^1\text{H NMR}$  (500 MHz,  $\text{CDCl}_3$ )  $\delta$  8.12 (d,  $J = 7.9$  Hz, 1H), 6.65 (d,  $J = 12.5$  Hz, 1H), 3.96 (s, 3H), 2.60 (d,  $J = 5.2$  Hz, 3H);  $^{13}\text{C NMR}$  (126 MHz,  $\text{CDCl}_3$ )  $\delta$  193.2 (d,  $J = 4.1$

Hz), 162.8 (d,  $J = 256.1$  Hz), 160.6 (d,  $J = 10.9$  Hz), 134.7 (d,  $J = 4.1$  Hz), 119.1 (d,  $J = 14.0$  Hz), 107.1 (d,  $J = 2.9$  Hz), 100.3 (d,  $J = 29.8$  Hz), 56.9, 31.1;  $^{19}\text{F}$  NMR (376 MHz,  $\text{CDCl}_3$ )  $\delta$  -105.92 (s, 1F); HRMS (EI):  $[\text{M}^+]$  calcd. for  $\text{C}_9\text{H}_8\text{BrFO}_2$ , 245.9692; found 245.9695.

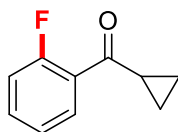

**cyclopropyl(2-fluorophenyl)methanone (2x):** Colorless oil (28.9 mg, 88%);  $R_f = 0.40$  (petroleum ether-EtOAc = 20:1);  $^1\text{H}$  NMR (500 MHz,  $\text{CDCl}_3$ )  $\delta$  7.77 (td,  $J = 7.6, 1.8$  Hz, 1H), 7.53-7.49 (m, 1.8 Hz, 1H), 7.23 (td,  $J = 7.7, 0.9$  Hz, 1H), 7.19-7.14 (m, 1H), 2.70-2.65 (m, 1H), 1.30 (q,  $J = 3.8$  Hz, 2H), 1.10-1.06 (m, 2H);  $^{13}\text{C}$  NMR (126 MHz,  $\text{CDCl}_3$ )  $\delta$  199.7 (d,  $J = 3.2$  Hz), 161.7 (d,  $J = 253.8$  Hz), 133.9 (d,  $J = 8.8$  Hz), 130.3 (d,  $J = 2.7$  Hz), 127.2 (d,  $J = 12.8$  Hz), 124.3 (d,  $J = 3.5$  Hz), 116.6 (d,  $J = 23.4$  Hz), 21.4 (d,  $J = 8.8$  Hz), 12.5;  $^{19}\text{F}$  NMR (471 MHz,  $\text{CDCl}_3$ )  $\delta$  -111.50 (s, 1F); HRMS (EI):  $[\text{M}^+]$  calcd. for  $\text{C}_{10}\text{H}_9\text{FO}$ , 164.0637; found 164.0647.

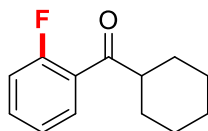

**cyclohexyl(2-fluorophenyl)methanone (2y):** Difluorination product has also been determined by GC-MS (5%); Colorless solid (31.7 mg, 77%);  $R_f = 0.47$  (petroleum ether-EtOAc = 20:1);  $^1\text{H}$  NMR (500 MHz,  $\text{CDCl}_3$ )  $\delta$  7.75 (td,  $J = 7.6, 1.8$  Hz, 1H), 7.51-7.47 (m, 1H), 7.22 (td,  $J = 7.7, 1.0$  Hz, 1H), 7.14-7.10 (m, 1H), 3.22-3.07 (m, 1H), 1.95 (d,  $J = 12.0$  Hz, 2H), 1.84-1.80 (m, 2H), 1.76-1.68 (m, 1H), 1.42-1.37 (m, 2H), 1.37-1.32 (m, 1H), 1.31-1.21 (m, 2H);  $^{13}\text{C}$  NMR (126 MHz,  $\text{CDCl}_3$ )  $\delta$  202.9 (d,  $J = 4.1$  Hz), 161.1 (d,  $J = 253.0$  Hz), 133.8 (d,  $J = 8.9$  Hz), 130.8 (d,  $J = 3.0$  Hz), 126.1 (d,  $J = 13.7$  Hz), 124.5 (d,  $J = 3.4$  Hz), 116.5 (d,  $J = 23.9$  Hz), 50.1 (d,  $J = 6.1$  Hz), 28.8, 26.0, 25.8;  $^{19}\text{F}$  NMR (471 MHz,  $\text{CDCl}_3$ )  $\delta$  -111.70 (s, 1F); HRMS (EI):  $[\text{M}^+]$  calcd. for  $\text{C}_{13}\text{H}_{15}\text{FO}$ , 206.1107; found 206.1102. (It contains a minor di-fluorination product, which was difficult to be separated from the mono-fluorination product.)

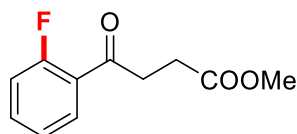

**methyl 4-(2-fluorophenyl)-4-oxobutanoate (2z):** Following the general condition,  $\text{AgNO}_3$  (0.15 mmol) was added; Colorless oil (27.7 mg, 66%);  $R_f = 0.28$  (petroleum ether-EtOAc = 10:1);  $^1\text{H}$  NMR (500 MHz,  $\text{CDCl}_3$ )  $\delta$  7.90 (td,  $J = 7.6, 1.8$  Hz, 1H), 7.58-7.50 (m, 1H), 7.24 (t,  $J = 7.6$  Hz, 1H), 7.15 (dd,  $J = 10.9, 8.7$  Hz, 3H), 3.71 (s, 3H), 3.35-3.30 (m, 2H), 2.76 (t,  $J = 6.5$  Hz, 2H);  $^{13}\text{C}$  NMR (126 MHz,  $\text{CDCl}_3$ )  $\delta$  196.3 (d,  $J = 4.1$  Hz), 173.2, 162.2 (d,  $J = 254.9$  Hz), 134.7 (d,  $J = 9.0$  Hz), 130.7 (d,  $J = 2.6$  Hz), 125.1 (d,  $J = 13.0$  Hz), 124.5 (d,  $J = 3.4$  Hz), 116.7 (d,  $J = 23.9$  Hz), 51.8, 38.3, 28.1;  $^{19}\text{F}$  NMR (376 MHz,  $\text{CDCl}_3$ )  $\delta$  -108.90 (s, 1F); HRMS (EI):  $[\text{M}^+]$  calcd. for  $\text{C}_{11}\text{H}_{11}\text{FO}_3$ , 210.0692; found 210.0701.

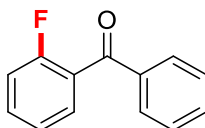

**(2-fluorophenyl)(phenyl)methanone (2aa):** Following the general condition, AgNO<sub>3</sub> (0.15 mmol) was added and the reaction time was 12 h; Difluorination product has also been determined by GC-MS (8%); Colorless solid (30.0 mg, 75%); *R<sub>f</sub>* = 0.58 (petroleum ether-EtOAc = 10:1); <sup>1</sup>H NMR (500 MHz, CDCl<sub>3</sub>) δ 7.86 (d, *J* = 8.2 Hz, 2H), 7.647.60 (m, 1H), 7.59-7.56 (m, 1H), 7.63-7.56 (m, 1H), 7.49 (t, *J* = 7.8 Hz, 2H), 7.29 (d, *J* = 8.3 Hz, 1H), 7.18 (t, *J* = 9.1 Hz, 1H); <sup>13</sup>C NMR (101 MHz, CDCl<sub>3</sub>) δ 193.6, 160.1 (d, *J* = 252.4 Hz), 137.3, 133.5, 133.2 (d, *J* = 8.3 Hz), 130.8 (d, *J* = 2.9 Hz), 129.9 (d, *J* = 0.7 Hz), 128.5, 127.0 (d, *J* = 14.3 Hz), 124.3 (d, *J* = 3.6 Hz), 116.3 (d, *J* = 21.7 Hz); <sup>19</sup>F NMR (376 MHz, CDCl<sub>3</sub>) δ -110.99 (s, 1F); HRMS (EI): [M<sup>+</sup>] calcd. for C<sub>13</sub>H<sub>9</sub>FO, 200.0637; found 200.0634. (It contains a minor di-fluorination product, which was difficult to be separated from the mono-fluorination product.)

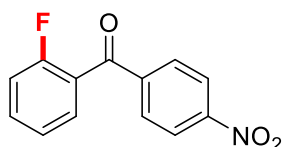

**(2-fluorophenyl)(4-nitrophenyl)methanone (2ab):** Following the general condition, AgNO<sub>3</sub> (0.15 mmol) was added; Yellow solid (33.3 mg, 68%); *R<sub>f</sub>* = 0.64 (petroleum ether-EtOAc = 5:1); <sup>1</sup>H NMR (500 MHz, CDCl<sub>3</sub>) δ 8.34 (d, *J* = 8.8 Hz, 2H), 7.98 (d, *J* = 9.9 Hz, 2H), 7.69-7.59 (m, 2H), 7.35 (t, *J* = 8.0 Hz, 1H), 7.24-7.15 (m, 1H); <sup>13</sup>C NMR (126 MHz, CDCl<sub>3</sub>) δ 191.8, 160.4 (d, *J* = 253.7 Hz), 150.4, 142.5, 134.4 (d, *J* = 8.5 Hz), 131.1 (d, *J* = 2.2 Hz), 130.4 (d, *J* = 1.2 Hz), 125.7 (d, *J* = 14.1 Hz), 124.8 (d, *J* = 3.6 Hz), 123.7, 116.6 (d, *J* = 21.6 Hz); <sup>19</sup>F NMR (376 MHz, CDCl<sub>3</sub>) δ -109.16 (s, 1F); HRMS (EI): [M<sup>+</sup>] calcd. for C<sub>13</sub>H<sub>8</sub>FNO<sub>3</sub>, 245.0488; found 245.0496.

## 2. The unsuccessful substrates in direct *ortho*-C-H bond fluorination of ketones

Unsuccessful substrates:

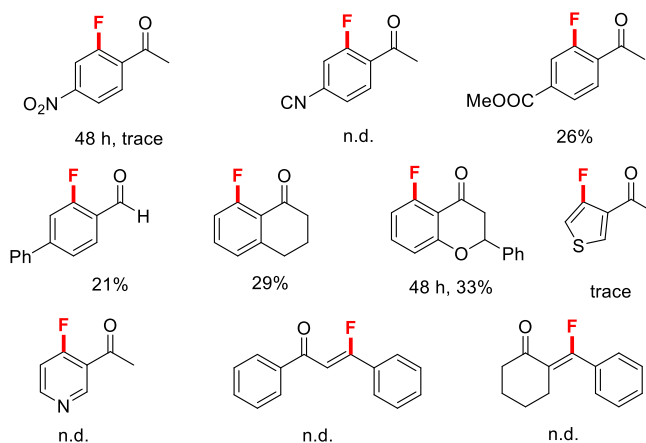

<sup>a</sup>Reaction conditions: ketone (0.1 mmol), Pd(OAc)<sub>2</sub> (2.2 mg, 0.01 mmol), NFSI (0.25 mmol), AgNO<sub>3</sub> (8.5 mg, 0.075 mmol), NH<sub>2</sub>COOMe (1.5 mg, 0.02 mmol), CH<sub>2</sub>Cl<sub>2</sub> (1.0 mL) at 95 °C for 24-48 h, under air. <sup>b</sup>GC-MS yield.

## V. The application of direct *ortho*-C(*sp*<sup>2</sup>)-H bond fluorination in the synthesis of Anacetrapib

### 1. Synthetic routine

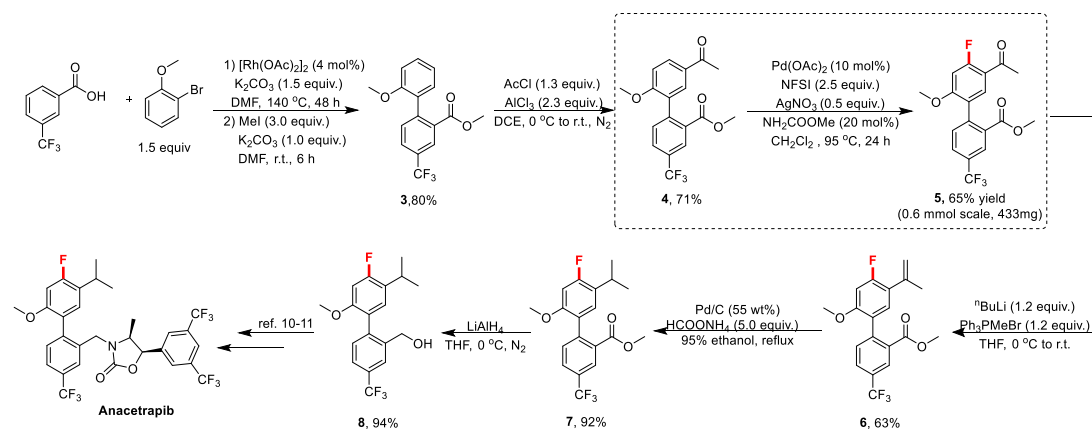

### 2. Characterization of the products

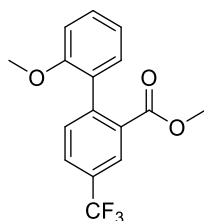

**methyl 2'-methoxy-4-(trifluoromethyl)-[1,1'-biphenyl]-2-carboxylate (3):** The biaryl **3** was prepared according to the literature.<sup>6</sup> An oven-dried 25 mL thick wall tubes equipped with a stir bar was charged with [Rh(OAc)<sub>2</sub>]<sub>2</sub> (22.1 mg, 0.05 mmol), 3-trifluoromethylbenzoic (237.5 mg, 1.25 mmol), K<sub>2</sub>CO<sub>3</sub> (262.4 mg, 1.9 mmol), and closed with a sealing cap. After the vessel was flushed with three alternating vacuum and nitrogen purge cycles, dry DMF (2 mL) and an *O*-bromoanisole (350.6 mg, 1.9 mmol) were added via syringe. The resulting mixture was stirred at 140 °C for 48 h. After cooling down to room temperature, K<sub>2</sub>CO<sub>3</sub> (172.8 mg, 1.25 mmol) and MeI (234 μL, 3.75 mmol) were added and stirred at room temperature for 6 h. Another five tubes were gave the same operation and after the reaction was completed, the combined mixture of six tubes were filtered, diluted with EtOAc (30 mL) and washed with water and brine (30 mL each), then the aqueous phases were extracted with EtOAc (3×20 mL). The combined organic phases were dried over anhydrous MgSO<sub>4</sub>, filtered, and the volatiles were removed under reduced pressure. The residue was purified by flash column chromatography (petroleum ether/ethyl acetate = 10/1) to give the product **3** as a colorless oil (1.86 g, 80% yield), *R*<sub>f</sub> = 0.66 (petroleum ether-EtOAc = 5:1); <sup>1</sup>H NMR (500 MHz, CDCl<sub>3</sub>) δ 8.17 (s, 1H), 7.85-7.75 (m, 1H), 7.50 (d, *J* = 8.0 Hz, 1H), 7.43-7.38 (m, 1H), 7.32-7.25 (m, 1H), 7.13-7.07 (m, 1H), 6.95 (dd, *J* = 8.3, 1.0 Hz, 1H), 3.75 (s, 3H), 3.73 (s, 3H); <sup>13</sup>C NMR (126 MHz, CDCl<sub>3</sub>) δ 167.3, 155.9, 142.5, 132.3, 132.0, 129.8, 129.6, 129.4 (d, *J* = 33.1 Hz), 129.1, 128.0 (q, *J* = 3.6 Hz), 126.4 (q, *J* = 3.7 Hz), 123.8 (q, *J* = 273.6 Hz), 120.6, 110.3, 55.2, 52.0; HRMS (ESI-TOF) *m/z*: [M+Na]<sup>+</sup> Calcd. for C<sub>16</sub>H<sub>13</sub>F<sub>3</sub>O<sub>3</sub>Na 333.0714; found: 333.0715.



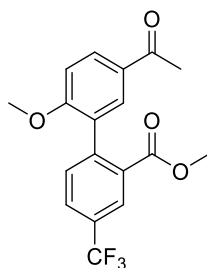

**methyl 5'-acetyl-2'-methoxy-4-(trifluoromethyl)-[1,1'-biphenyl]-2-carboxylate (4):** The product of **4** was prepared according to the literature.<sup>7</sup> A dried 50 mL round bottle flask with a magnetic stir bar was charged with **3** (1.71 g, 5.5 mmol), and dried DCE (25 mL) under an N<sub>2</sub> atmosphere. Acetyl chloride (0.55 g, 7.0 mmol) was added dropwise to the mixture at 0 °C under stirring. The resulting mixture was stirred at 0 °C for 5 min and then AlCl<sub>3</sub> (1.67 g, 12.5 mmol) was slowly added into the reaction mixture. The reaction mixture was stirred at room temperature for 24 h. Purification was conducted by column chromatography on silica gel to provide the desired product **4** as a colorless solid (1.37 g, 71% yield), *R*<sub>f</sub> = 0.27 (petroleum ether-EtOAc = 5:1); <sup>1</sup>H NMR (600 MHz, CDCl<sub>3</sub>) δ 8.20 (s, 1H), 8.05 (dd, *J* = 8.6, 2.1 Hz, 1H), 7.90 (s, 1H), 7.84 (d, *J* = 8.0 Hz, 1H), 7.50 (d, *J* = 8.0 Hz, 1H), 6.99 (d, *J* = 8.7 Hz, 1H), 3.82 (s, 3H), 3.73 (s, 3H), 2.61 (s, 3H); <sup>13</sup>C NMR (126 MHz, CDCl<sub>3</sub>) δ 196.5, 166.8, 159.9, 141.6, 132.0, 131.9, 130.9, 130.4, 130.1, 129.4 (d, *J* = 33.3 Hz), 129.5, 128.4 (q, *J* = 3.3 Hz), 126.7 (q, *J* = 3.7 Hz), 123.7 (q, *J* = 272.3 Hz), 109.7, 55.6, 52.1, 26.3; HRMS (ESI-TOF) *m/z*: [M+Na]<sup>+</sup> Calcd. for C<sub>18</sub>H<sub>15</sub>F<sub>3</sub>O<sub>4</sub>Na 375.0820; found: 375.0820.

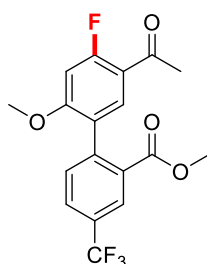

**methyl 5'-acetyl-4'-fluoro-2'-methoxy-4-(trifluoromethyl)-[1,1'-biphenyl]-2-carboxylate (5):** In a 25 mL test tube equipped with a stir bar, substrate **4** (211.2 mg, 0.6 mmol), Pd(OAc)<sub>2</sub> (13.4 mg, 0.06 mmol), NFSI (473 mg, 1.5 mmol), NH<sub>2</sub>COOMe (4.5 mg, 0.12 mmol), AgNO<sub>3</sub> (50.7 mg, 0.3 mmol) and DCM (2.5 mL) were added successively. Then the tube was sealed and stirred at the 95 °C for 24 h. Another two tubes were gave the same operation and after the reaction was complete, the combined mixture of three tubes were combined, the resulting mixture was cooled to room temperature, diluted with DCM and concentrated under reduced pressure. Then the residue was purified by silica gel chromatography to afford the desired fluorination product **5** as a colorless solid (433 mg, 65% yield), *R*<sub>f</sub> = 0.45 (petroleum ether-EtOAc = 5:1); <sup>1</sup>H NMR (600 MHz, CDCl<sub>3</sub>) δ 8.20 (s, 1H), 7.85 (d, *J* = 8.4 Hz, 1H), 7.83 (d, *J* = 8.0 Hz, 1H), 7.46 (d, *J* = 8.0 Hz, 1H), 6.68 (d, *J* = 12.8 Hz, 1H), 3.80 (s, 3H), 3.76 (s, 3H), 2.66 (d, *J* = 5.2 Hz, 3H); <sup>13</sup>C NMR (101 MHz, CDCl<sub>3</sub>) δ 194.3 (d, *J* = 4.0 Hz), 166.7, 164.0 (d, *J* = 257.2 Hz), 161.3 (d, *J* = 10.8 Hz), 140.8, 132.2, 131.7, 131.5 (d, *J* = 4.3 Hz), 130.1 (q, *J* = 33.2 Hz), 128.5 (q, *J* = 3.6 Hz), 126.8 (q, *J* = 3.7 Hz), 126.1 (d, *J* = 2.9 Hz), 123.6 (q, *J* = 272.4 Hz), 118.1 (d, *J* = 13.0 Hz), 98.9 (d, *J* = 28.9 Hz), 56.1, 52.2, 31.4 (d, *J* = 7.8 Hz); <sup>19</sup>F NMR (376 MHz, CDCl<sub>3</sub>) δ -62.75 (s, 3F), -104.48 (s, 1F); HRMS (ESI-TOF) *m/z*: [M+Na]<sup>+</sup> Calcd. for C<sub>18</sub>H<sub>14</sub>F<sub>4</sub>O<sub>4</sub>Na 393.0726; found: 393.0725.

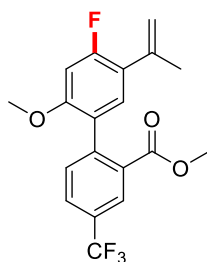

**methyl 4'-fluoro-2'-methoxy-5'-(prop-1-en-2-yl)-4-(trifluoromethyl)-[1,1'-biphenyl]-2-carboxylate (6):** The product of **6** was prepared according to the literature.<sup>8</sup> In a dry round bottom flask, a dissolved methyltriphenylphosphonium bromide (750 mg, 2.1 mmol) in dry THF solution (10 mL) was added dropwise n-Butyl lithium (1.3 mL, 2.0 mmol, 1.6 mol/L in hexane) in THF solution under N<sub>2</sub> protection at -30 °C. After addition, the mixture was continued to stir for 30 minutes at the same temperature then the **5** (370 mg, 1.0 mmol) in 1 mL THF was added dropwise by syringe. The mixture was allowed to warm to room temperature and stirred for 24 h. The resulting solution was quenched with saturated NH<sub>4</sub>Cl (2 mL) at 0 °C and extracted with EtOAc. The combined organic layer was washed with brine, dried over anhydrous MgSO<sub>4</sub> and filtered. The filtrate was concentrated in vacuo, purified by silica gel chromatography to afford the desired product **6** as a colorless solid (232 mg, 63% yield), *R<sub>f</sub>* = 0.64 (petroleum ether-EtOAc = 5:1); <sup>1</sup>H NMR (500 MHz, CDCl<sub>3</sub>) δ 8.15 (s, 1H), 7.80 (d, *J* = 9.4 Hz, 1H), 7.47 (d, *J* = 8.0 Hz, 1H), 7.21 (d, *J* = 8.7 Hz, 1H), 6.65 (d, *J* = 12.7 Hz, 1H), 5.25 (d, *J* = 32.9 Hz, 2H), 3.75 (s, 3H), 3.73 (s, 3H), 2.17 (s, 3H); <sup>13</sup>C NMR (126 MHz, CDCl<sub>3</sub>) δ 167.2, 160.6 (d, *J* = 250.4 Hz), 156.1 (d, *J* = 10.3 Hz), 141.5, 139.2, 132.2, 132.1, 130.1 (d, *J* = 6.3 Hz), 129.6 (q, *J* = 32.8 Hz), 128.1 (q, *J* = 3.7 Hz), 126.6 (q, *J* = 3.7 Hz), 124.8 (d, *J* = 3.7 Hz), 123.7 (q, *J* = 273.3 Hz), 122.2 (d, *J* = 13.7 Hz), 115.9 (d, *J* = 4.7 Hz), 99.2 (d, *J* = 28.2 Hz), 55.6, 52.1, 23.2 (d, *J* = 3.4 Hz); <sup>19</sup>F NMR (376 MHz, CDCl<sub>3</sub>) δ -62.75 (s, 3F), -104.48 (s, 1F); HRMS (EI): [M<sup>+</sup>] calcd. for C<sub>19</sub>H<sub>16</sub>F<sub>4</sub>O<sub>3</sub>, 368.1036; found 368.1034.

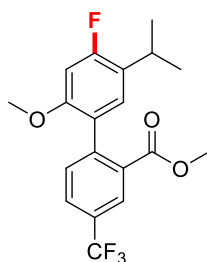

**methyl 4'-fluoro-5'-isopropyl-2'-methoxy-4-(trifluoromethyl)-[1,1'-biphenyl]-2-carboxylate (7):** The product of **7** was prepared according to the literature.<sup>9</sup> In a dry round bottom flask, substrate **6** (184 mg, 0.5 mmol) was added to 95% ethanol (10 mL), followed by addition of ammonium formate (94.5 mg, 1.5 mmol). Pd/C (55 wt%, 10 mg) was then added, and the reaction was heated under reflux for 8 h. Afterwards the reaction was cooled, followed by filtration. The solution was diluted with 0.1 M KOH (aq) (10 mL), followed by extraction with dichloromethane (4 × 10 mL). The combined organic fractions were dried over anhydrous MgSO<sub>4</sub>, then evaporated in vacuo to give the desired product **7** as a colorless solid (170 mg, 92% yield), *R<sub>f</sub>* = 0.67 (petroleum ether-EtOAc = 5:1); <sup>1</sup>H NMR (400 MHz, CDCl<sub>3</sub>) δ 8.13 (s, 1H), 7.81 (d, *J* = 8.0 Hz, 1H), 7.48 (d, *J* = 8.0 Hz, 1H), 7.12 (d, *J* = 8.5 Hz, 1H), 6.64 (d, *J* = 12.0 Hz, 1H), 3.75 (s, 3H), 3.72 (s, 3H), 3.30-3.18 (m, 1H), 1.29 (d, *J* = 6.9 Hz, 6H); <sup>13</sup>C NMR (101 MHz, CDCl<sub>3</sub>) δ 167.5, 161.0 (d, *J* = 246.3 Hz), 154.8 (d, *J* = 10.1 Hz), 141.9, 132.3, 132.1, 129.4 (q, *J* = 33.1 Hz), 123.8 (q, *J* = 274.4 Hz), 128.2 (d, *J* = 7.4 Hz), 128.0 (q, *J* = 3.5 Hz), 127.1 (d, *J* = 15.4 Hz),

126.1 (q,  $J = 3.7$  Hz), 124.6 (d,  $J = 3.5$  Hz), 98.8 (d,  $J = 27.7$  Hz), 55.6, 52.2, 26.7, 22.8;  $^{19}\text{F}$  NMR (376 MHz,  $\text{CDCl}_3$ )  $\delta$  -62.61 (s, 3F), -116.14 (s, 1F); HRMS (EI):  $[\text{M}^+]$  calcd. for  $\text{C}_{19}\text{H}_{18}\text{F}_4\text{O}_3$ , 370.1192; found 370.1181.

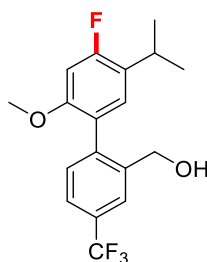

**(4'-fluoro-5'-isopropyl-2'-methoxy-4-(trifluoromethyl)-[1,1'-biphenyl]-2-yl)methanol (8):** The product of **8** was prepared according to the literature.<sup>9</sup> In a dry round bottom flask, to a stirred suspension of  $\text{LiAlH}_4$  (0.4 mL, 0.4 mmol, 1.0 mol/L in THF) in THF (20 mL) at 0 °C was added a solution of **7** (130 mg, 0.35 mmol) in THF (2 mL). The reaction was stirred at room temperature and was monitored by TLC to determine the consumption of the **7**. The reaction mixture was quenched at 0 °C with 1N HCl and was then extracted with EtOAc ( $3 \times 5$  mL). The combined organic layers were dried over anhydrous  $\text{MgSO}_4$ , filtered and concentrated under reduced pressure to afford the desired product **8** as a colorless solid (113 mg, 94% yield),  $R_f = 0.48$  (petroleum ether-EtOAc = 5:1);  $^1\text{H}$  NMR (400 MHz,  $\text{CDCl}_3$ )  $\delta$  7.89 (s, 1H), 7.62 (d,  $J = 7.8$  Hz, 1H), 7.33 (d,  $J = 7.9$  Hz, 1H), 7.02 (d,  $J = 8.6$  Hz, 1H), 6.71 (d,  $J = 12.0$  Hz, 1H), 4.61-4.39 (m, 2H), 3.76 (s, 3H), 3.17-3.30 (m, 1H), 2.17 (s, 1H), 1.27 (d,  $J = 5.6$  Hz, 6H);  $^{13}\text{C}$  NMR (101 MHz,  $\text{CDCl}_3$ )  $\delta$  160.9 (d,  $J = 246.3$  Hz), 155.0 (d,  $J = 10.1$  Hz), 140.5, 140.3, 131.0, 130.0 (q,  $J = 32.5$  Hz), 129.1 (d,  $J = 7.3$  Hz), 127.4 (d,  $J = 15.3$  Hz), 124.7 (q,  $J = 3.7$  Hz), 124.2 (q,  $J = 272.2$  Hz), 124.2 (q,  $J = 3.7$  Hz), 123.8 (d,  $J = 3.6$  Hz), 99.4 (d,  $J = 27.7$  Hz), 62.9, 56.0, 26.7 (d,  $J = 1.1$  Hz), 22.8;  $^{19}\text{F}$  NMR (376 MHz,  $\text{CDCl}_3$ )  $\delta$  -62.43 (s, 3F), -116.17 (s, 1F); HRMS (EI):  $[\text{M}^+]$  calcd. for  $\text{C}_{18}\text{H}_{18}\text{F}_4\text{O}_2$ , 342.1243; found 342.1240.

## VI. Experimental studies on the role of carbamate

### 1. The synthesis of complex **9**

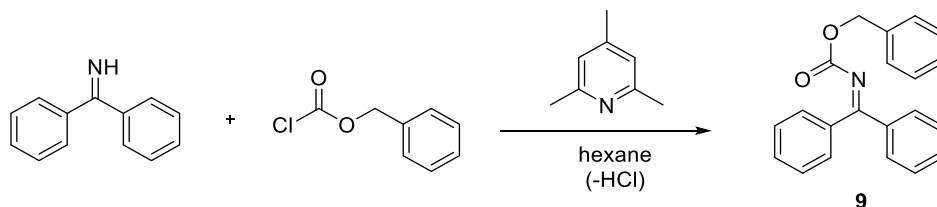

**benzyl (diphenylmethylene)carbamate (9):** The product of **9** was prepared according to the literature.<sup>12</sup> Benzyl carbonochloridate (1.28 g, 7.5 mmol) was added dropwise to a stirred solution of diphenylmethanimine (0.91 g, 5.0 mmol) and 2,4,6-trimethylpyridine (0.81 g, 6.7 mmol) in dry hexane (25 mL) at room temperature under the nitrogen atmosphere. The mixture was refluxed for 24 h. The white precipitate was then filtered off and washed with hot hexane (30 mL). The filtrate and washings

were combined and the volatile components removed in vacuo. The residue was crystallized from pentane to afford the desired product **9** as a colorless solid (1.10 g, 70% yield),  $R_f = 0.40$  (petroleum ether-EtOAc = 10:1);  $^1\text{H NMR}$  (500 MHz,  $\text{CDCl}_3$ )  $\delta$  7.85-7.80 (m, 2H), 7.63-7.59 (m, 1H), 7.53-7.46 (m, 4H), 7.41-7.33 (m, 5H), 7.32-7.28 (m, 2H), 5.11 (d,  $J = 17.2$  Hz, 2H);  $^{13}\text{C NMR}$  (126 MHz,  $\text{CDCl}_3$ )  $\delta$  196.78, 156.7, 137.6, 136.2, 132.4, 130.1, 128.6, 128.3, 128.2, 128.1, 67.0; **HRMS** (EI):  $[\text{M}^+]$  calcd. for  $\text{C}_{21}\text{H}_{17}\text{NO}_2$  315.1259; found: 315.1260.

## 2. Experimental studies on the role of carbamate

**Table S7.** Experimental studies on the role of carbamate

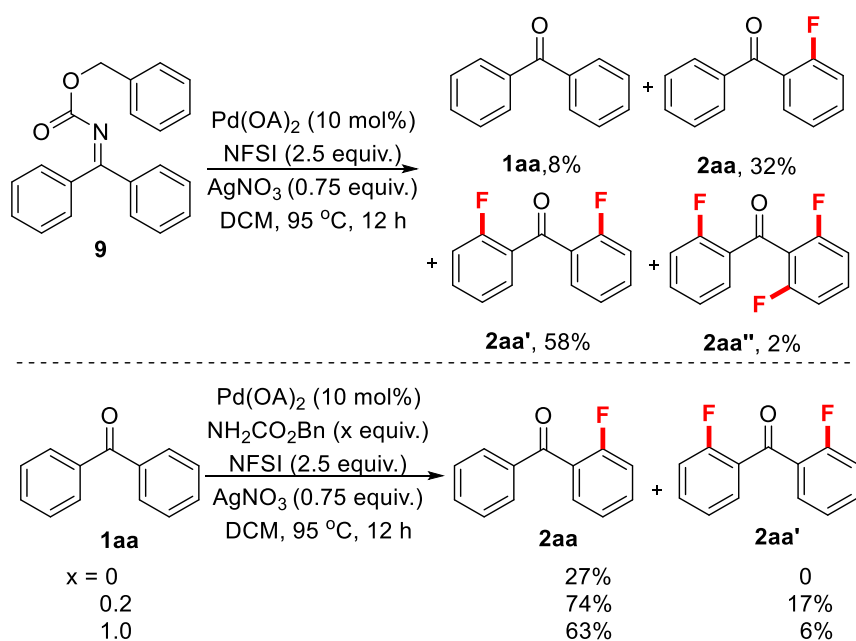

## 1. X-Ray data for 2e

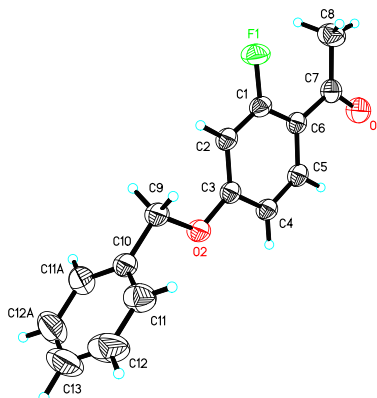

|                                  |                                       |                     |  |
|----------------------------------|---------------------------------------|---------------------|--|
| Identification code              | d8v18818                              |                     |  |
| Empirical formula                | $C_{15}H_{13}FO_2$                    |                     |  |
| Formula weight                   | 244.25                                |                     |  |
| Temperature                      | 190(2) K                              |                     |  |
| Wavelength                       | 0.71073 Å                             |                     |  |
| Crystal system                   | Orthorhombic                          |                     |  |
| Space group                      | P n m a                               |                     |  |
| Unit cell dimensions             | a = 8.2060(8) Å                       | $\alpha = 90^\circ$ |  |
|                                  | b = 6.9192(6) Å                       | $\beta = 90^\circ$  |  |
|                                  | c = 22.420(2) Å                       | $\gamma = 90^\circ$ |  |
| Volume                           | 1273.0(2) Å <sup>3</sup>              |                     |  |
| Z                                | 4                                     |                     |  |
| Density (calculated)             | 1.274 Mg/m <sup>3</sup>               |                     |  |
| Absorption coefficient           | 0.093 mm <sup>-1</sup>                |                     |  |
| F(000)                           | 512                                   |                     |  |
| Crystal size                     | 0.200 x 0.170 x 0.130 mm <sup>3</sup> |                     |  |
| Theta range for data collection  | 2.643 to 25.987 °                     |                     |  |
| Index ranges                     | -10<=h<=9, -8<=k<=8, -23<=l<=27       |                     |  |
| Reflections collected            | 6041                                  |                     |  |
| Independent reflections          | 1348 [R(int) = 0.0502]                |                     |  |
| Completeness to theta = 25.242 ° | 99.1 %                                |                     |  |
| Absorption correction            | Semi-empirical from equivalents       |                     |  |
| Max. and min. transmission       | 0.7456 and 0.6035                     |                     |  |

|                                   |                                             |
|-----------------------------------|---------------------------------------------|
| Refinement method                 | Full-matrix least-squares on F <sup>2</sup> |
| Data / restraints / parameters    | 1348 / 0 / 111                              |
| Goodness-of-fit on F <sup>2</sup> | 1.044                                       |
| Final R indices [I>2sigma(I)]     | R1 = 0.0429, wR2 = 0.1140                   |
| R indices (all data)              | R1 = 0.0616, wR2 = 0.1351                   |
| Extinction coefficient            | 0.088(16)                                   |
| Largest diff. peak and hole       | 0.145 and -0.114 e.Å <sup>-3</sup>          |

## 2. X-Ray data for 2ab

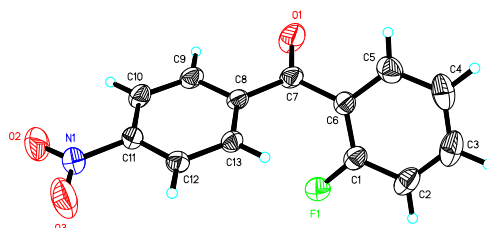

**Table S9.** Crystal data and structure refinement for dd19334.

|                                  |                                                   |                   |
|----------------------------------|---------------------------------------------------|-------------------|
| Identification code              | dd19334                                           |                   |
| Empirical formula                | C <sub>13</sub> H <sub>8</sub> F N O <sub>3</sub> |                   |
| Formula weight                   | 245.20                                            |                   |
| Temperature                      | 293(2) K                                          |                   |
| Wavelength                       | 0.71073 Å                                         |                   |
| Crystal system                   | Monoclinic                                        |                   |
| Space group                      | P 21/n                                            |                   |
| Unit cell dimensions             | a = 4.1258(2) Å                                   | α = 90 °          |
|                                  | b = 22.7811(8) Å                                  | β = 93.5990(10) ° |
|                                  | c = 11.8050(7) Å                                  | γ = 90 °          |
| Volume                           | 1107.37(9) Å <sup>3</sup>                         |                   |
| Z                                | 4                                                 |                   |
| Density (calculated)             | 1.471 Mg/m <sup>3</sup>                           |                   |
| Absorption coefficient           | 0.117 mm <sup>-1</sup>                            |                   |
| F(000)                           | 504                                               |                   |
| Crystal size                     | 0.180 x 0.150 x 0.130 mm <sup>3</sup>             |                   |
| Theta range for data collection  | 2.487 to 25.998 °                                 |                   |
| Index ranges                     | -5<=h<=5, -28<=k<=28, -14<=l<=14                  |                   |
| Reflections collected            | 16486                                             |                   |
| Independent reflections          | 2144 [R(int) = 0.0320]                            |                   |
| Completeness to theta = 25.242 ° | 98.8 %                                            |                   |

|                                      |                                       |
|--------------------------------------|---------------------------------------|
| Absorption correction                | Semi-empirical from equivalents       |
| Max. and min. transmission           | 0.7456 and 0.6695                     |
| Refinement method                    | Full-matrix least-squares on $F^2$    |
| Data / restraints / parameters       | 2144 / 2 / 177                        |
| Goodness-of-fit on $F^2$             | 1.037                                 |
| Final R indices [ $I > 2\sigma(I)$ ] | $R1 = 0.0451$ , $wR2 = 0.1156$        |
| R indices (all data)                 | $R1 = 0.0538$ , $wR2 = 0.1251$        |
| Extinction coefficient               | 0.044(17)                             |
| Largest diff. peak and hole          | 0.180 and -0.181 e. $\text{\AA}^{-3}$ |

## VIII. References

1. D.-M. Shen, M. P. Dwyer, C. J. Sinz, D. Wang, S. J. Stachel, D. V. Paone, A. Forster, R. Berger, Y. Chen, Y. Qian, S. Xu, C. Hu, W. D. Shipe, J. Fu, Z. Guo, H. Li and Y. Bo, 6-Alkyl Dihydropyrazolopyrimidinone Compounds as PDE2 Inhibitors. US 20180134712A1.
2. K. F. Stensrud, D. Heger, P. Sebej, J. Wirzb and R. S. Givens, Fluorinated Photoremovable Protecting Groups: The Influence of Fluoro substituents on the Photo-Favorskii Rearrangement. *Photochem. Photobiol. Sci.*, **2008**, 7, 614-624.
3. A. Edmunds, A. Jeanguenat, P. J. M. Jung, M. Muehlebach, Pesticidally Active Polycyclic Derivatives with Sulfur Containing Substituents. US 20170318809A1.
4. K. Guo, Z. Zhang, A. Li, Y. Li, J. Huang, Z. Yang, Photoredox-Catalyzed Isomerization of Highly-Substituted Allylic Alcohols via C-H bond activation. *Angew. Chem. Int. Ed.* **2020**, 59, 11660-11668.
5. Y. Zhong and W. Han, Iron-catalyzed Carbonylative Suzuki Reactions under Atmospheric Pressure of Carbon Monoxide. *Chem. Commun.* **2014**, 50, 3874-3877.
6. P. Weber, C. K. Rank, E. Yalcinkaya, M. Dyga, T. van Lingen, R. Schmid, F. W. Patureau and L. J. Gooßen, Rhodium-Catalyzed ortho-Arylation of (Hetero)aromatic Acids. *Adv. Synth. Catal.* 2019, **361**, 3925-3929.
7. J. Yin and J. You, Concise Synthesis of Polysubstituted Carbohelicenes by a C-H Activation/Radical Reaction/C-H Activation Sequence. *Angew. Chem. Int. Ed.* **2019**, 58, 302-306.
8. Y.-H. Xu, J. Lu and T.-P. Loh, Direct Cross-Coupling Reaction of Simple Alkenes with Acrylates Catalyzed. *J. Am. Chem. Soc.* **2009**, 131, 1372-1373.
9. M. Kapoor, P. Chand-Thakuri and M. C. Young, Carbon Dioxide-Mediated C(sp<sup>2</sup>)-H Arylation of Primary and Secondary Benzylamines. *J. Am. Chem. Soc.* **2019**, 141, 7980-7989.
10. C. J. Smith, A. Ali, M. L. Hammond, H. Li, Z. Lu, J. Napolitano, G. E. Taylor, C. F. Thompson, M. S. Anderson, Y. Chen, S. S. Eveland, Q. Guo, S. A. Hyland, D. P. Milot, C. P. Sparrow, S. D. Wright, A.-M. Cumiskey, M. Latham, L. B. Peterson, R. Rosa, J. V. Pivnichny, X. Tong, S. S. Xu and P. J. Sinclair, Biphenyl-Substituted Oxazolidinones as Cholesteryl Ester Transfer Protein Inhibitors: Modifications of the Oxazolidinone Ring Leading to the Discovery of Anacetrapib. *J. Med. Chem.* **2011**, 54, 4880-4895.
11. S. G. Ouellet, A. Roy, C. Molinaro, R. Angelaud, J.-F. Marcoux, P. D. O'Shea and I. W. Davies, Preparative Scale Synthesis of the Biaryl Core of Anacetrapib via a Ruthenium-Catalyzed Direct Arylation Reaction: Unexpected Effect of Solvent Impurity on the Arylation Reaction. *J. Org. Chem.* **2011**, 76, 1436-1439.
12. R. Kupfer, S. Meier and E.-U. Würthwein, A Facile Method for the Synthesis of Substituted N-Methylenecarboxamides and Alkyl N-Methylenecarbamates. *Synthesis* **1984**, 688-690.



## IX. NMR Spectra

171127.17161801.fid  
WQZ20171123-AA CDCl<sub>3</sub> 1127

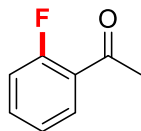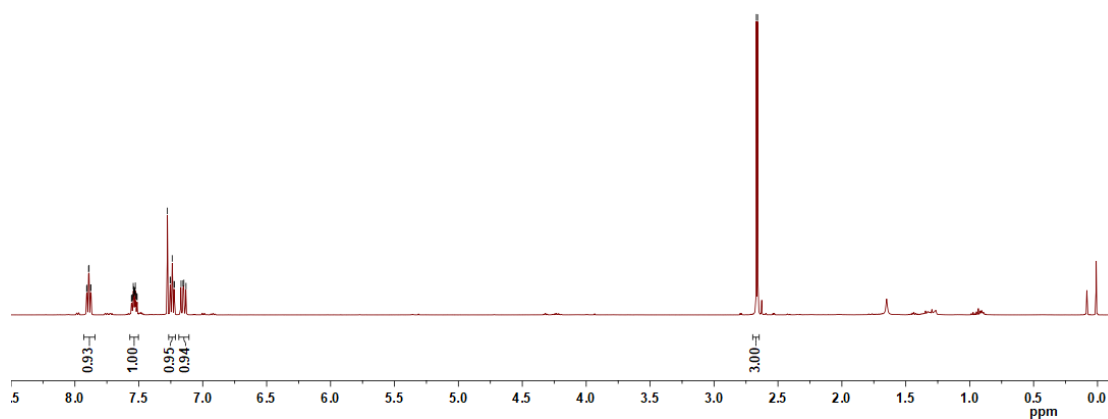

171129.17163392.fid  
WQZ20171129-AA1 CDCl<sub>3</sub> 1129

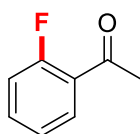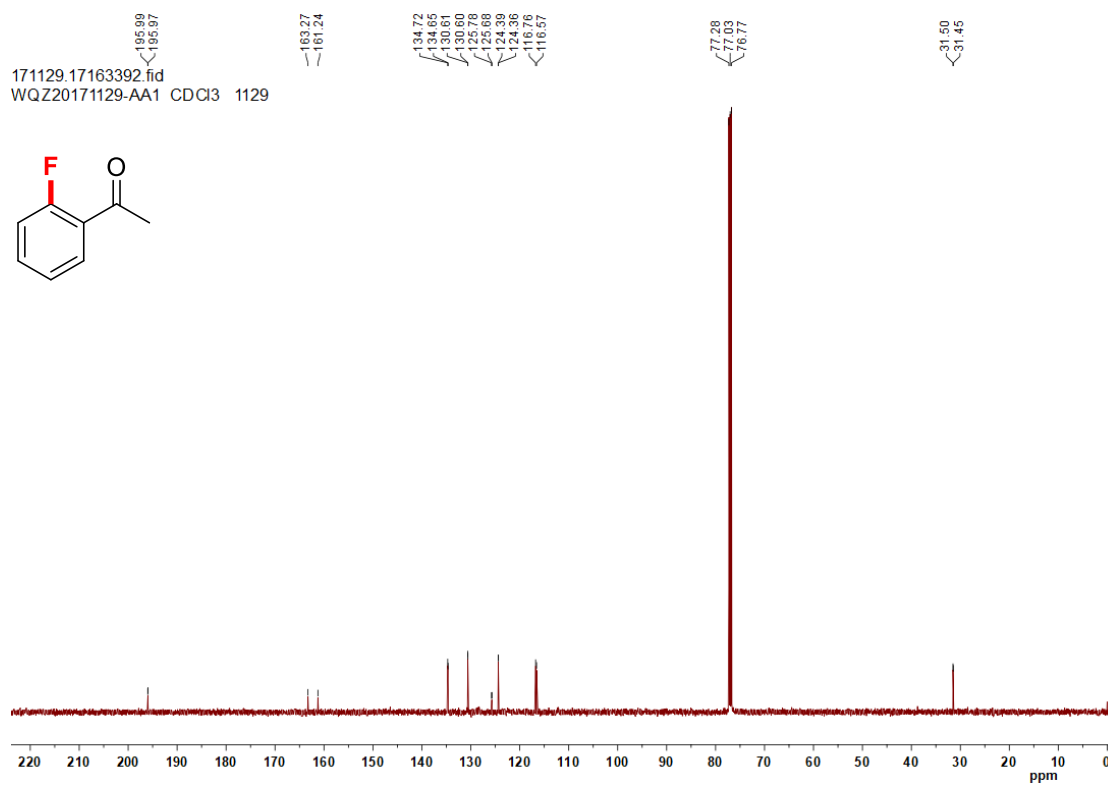

Oct18-2018.240.fid

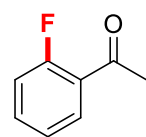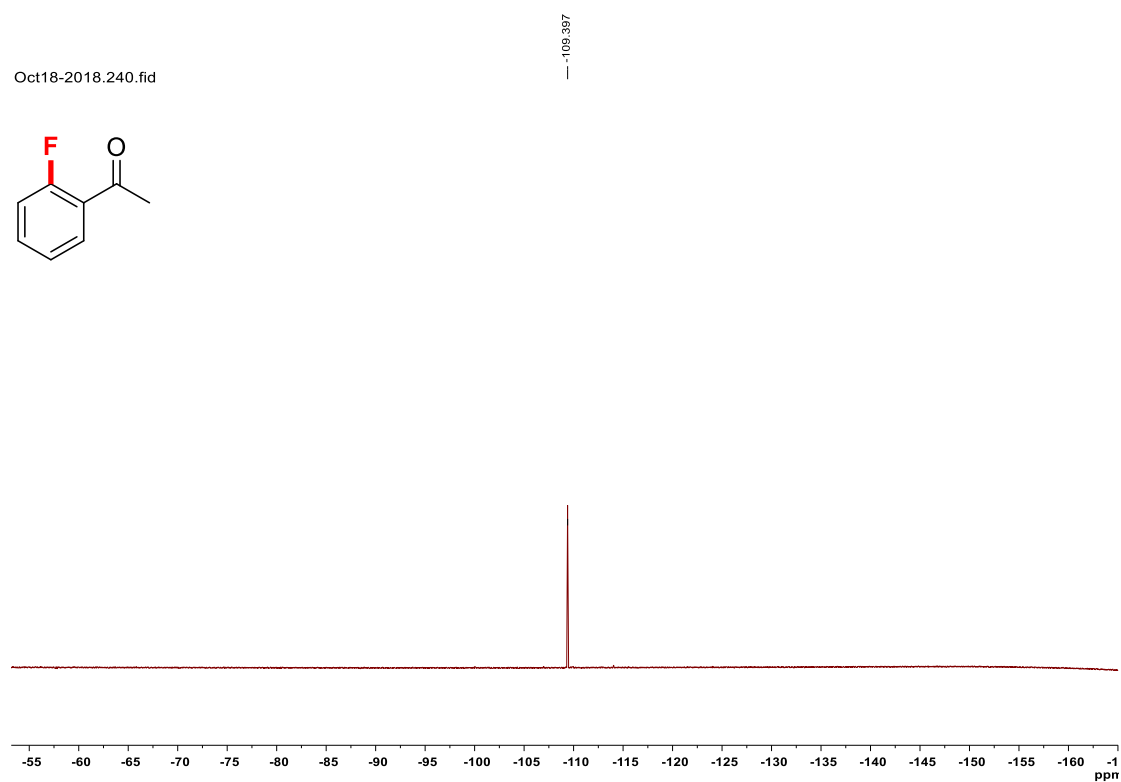

171117.1715719.fid  
WQZ20171117-dCH3 CDCl3 1117

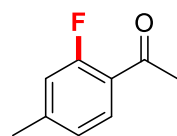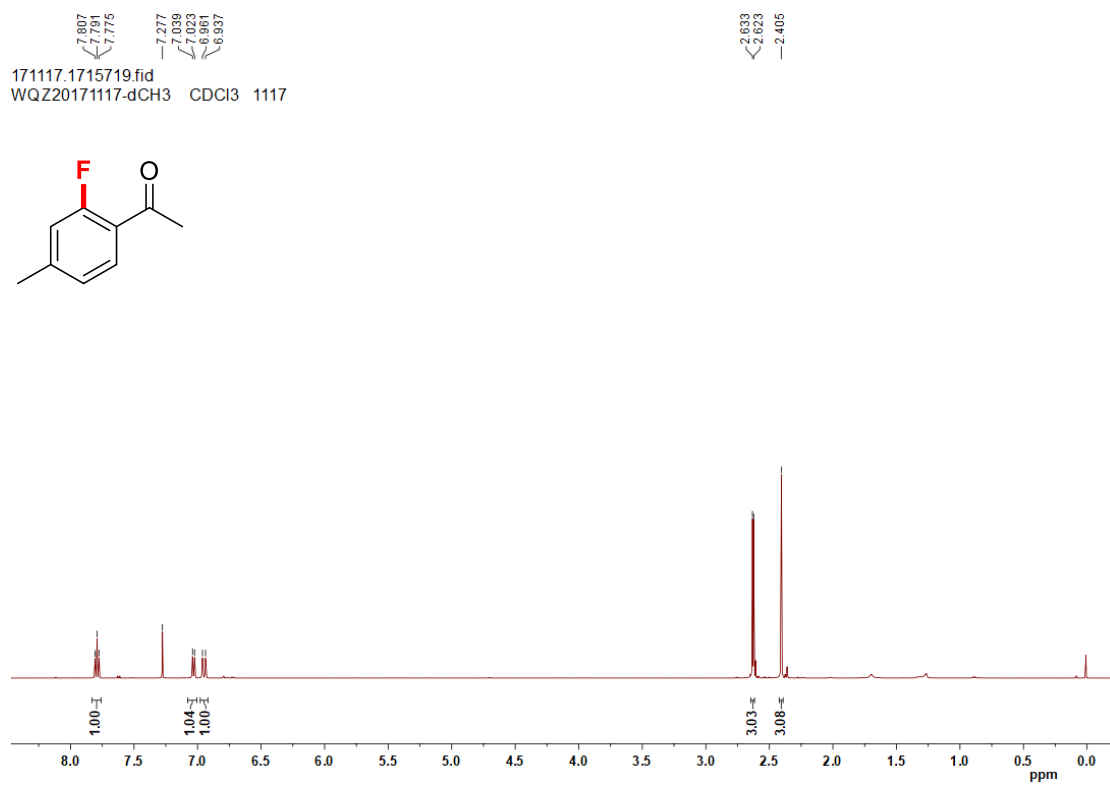

171129.1716181.fid  
WQZ20171117-DCH3 CDCl3 1129

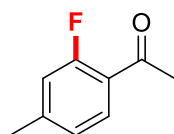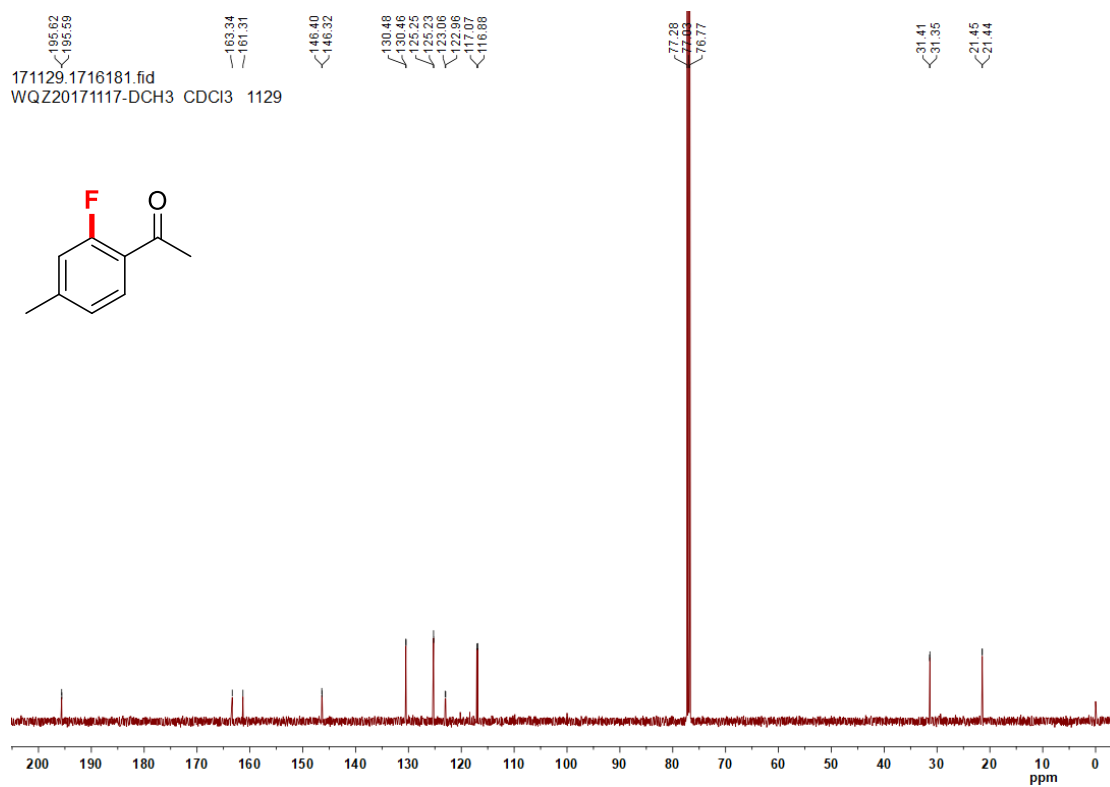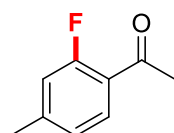

Oct18-2018.200.fid

—109.978

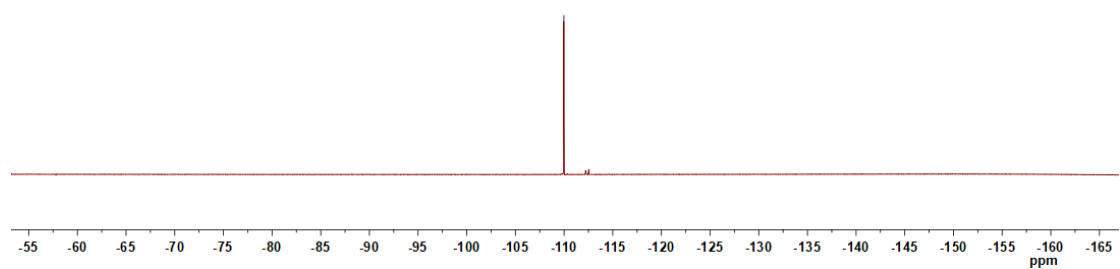

171129.17163422.fid  
WQZ20171129-DOCH3 CDCl<sub>3</sub> 1129

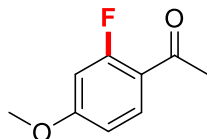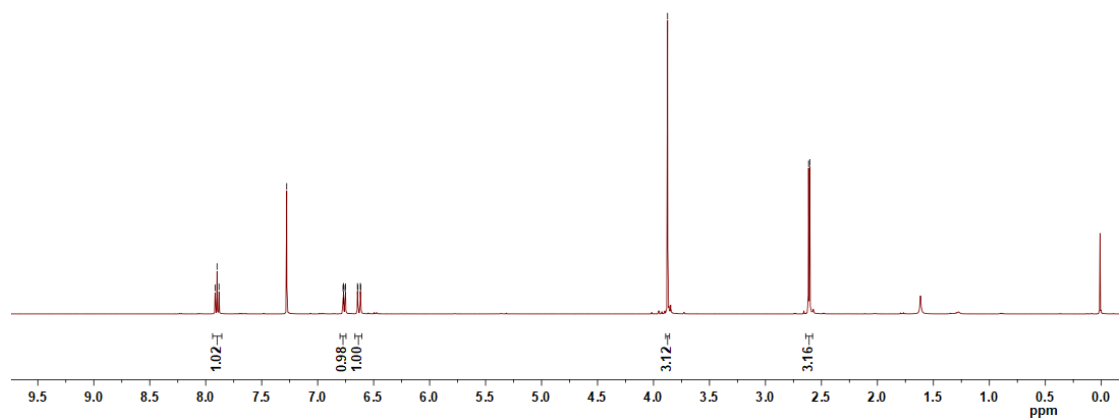

171201.17165302.fid  
WQZ20171129-DOCH3 CDCl3 1201

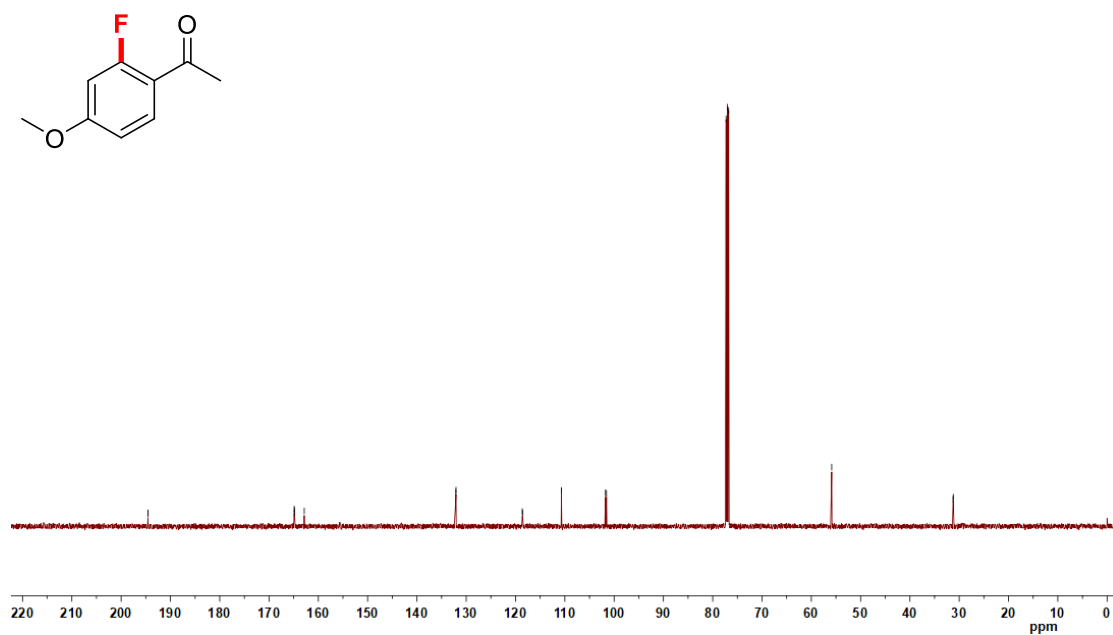

Oct18-2018.210.fid

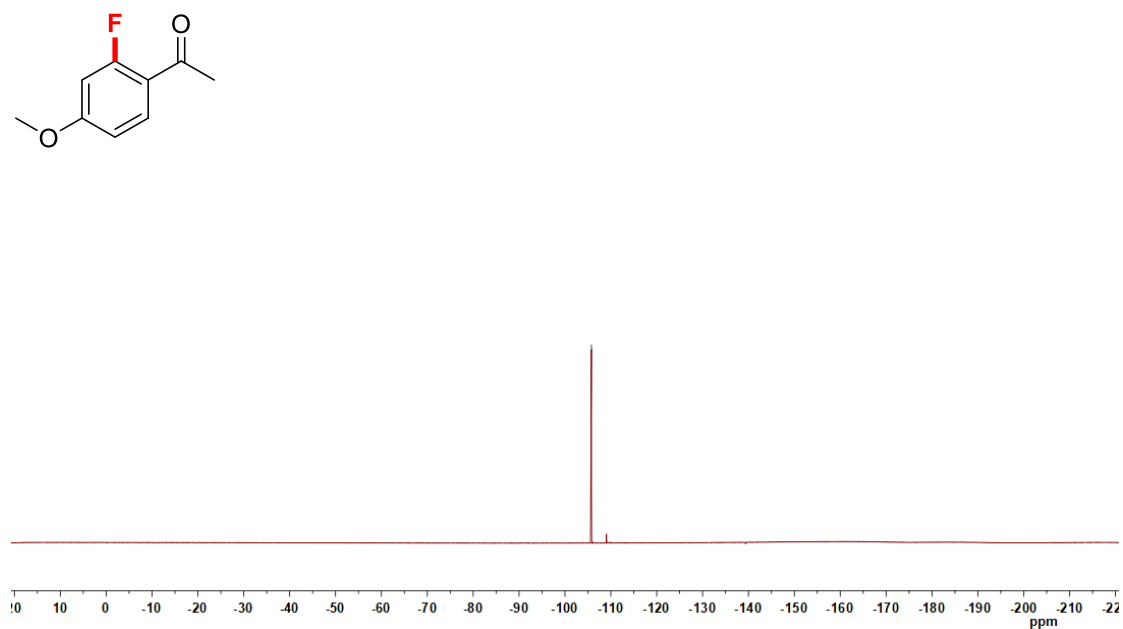

180115.18008381.fid  
WQZ20180115-dOCF3 CDCl3 0115

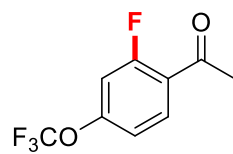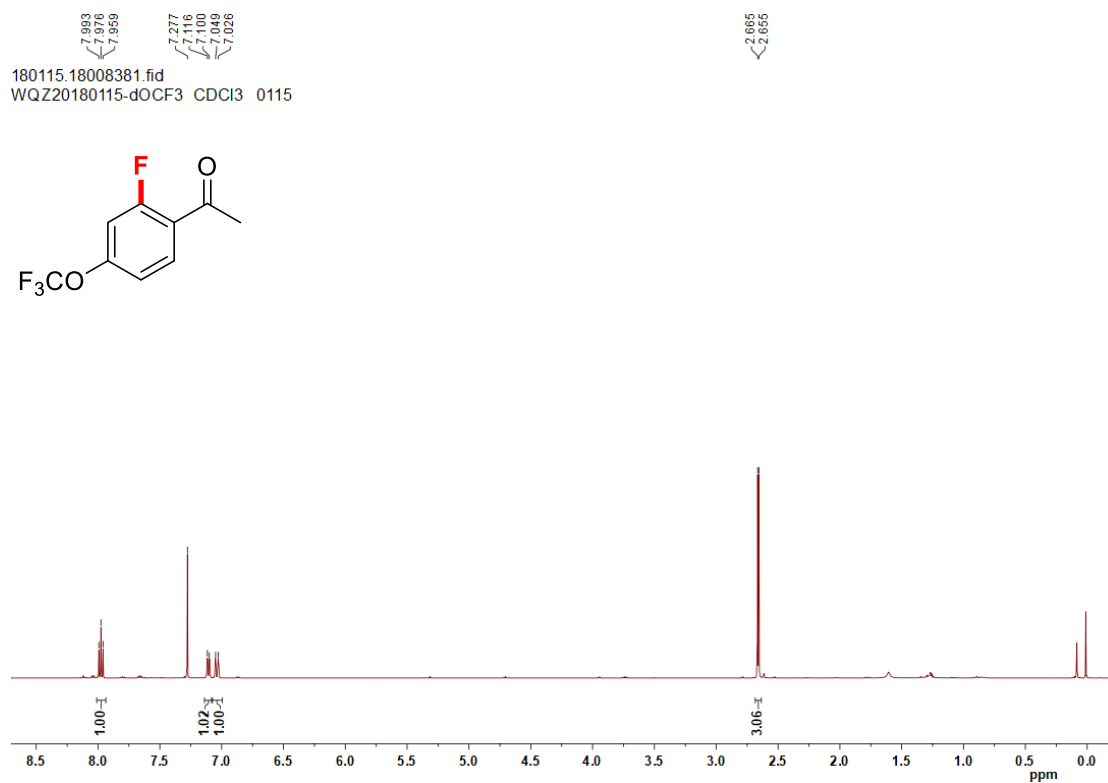

180122.18013281.fid  
WQZ20180122-dOCF3 CDCl3 0122

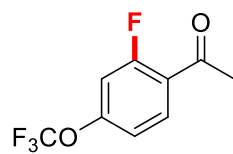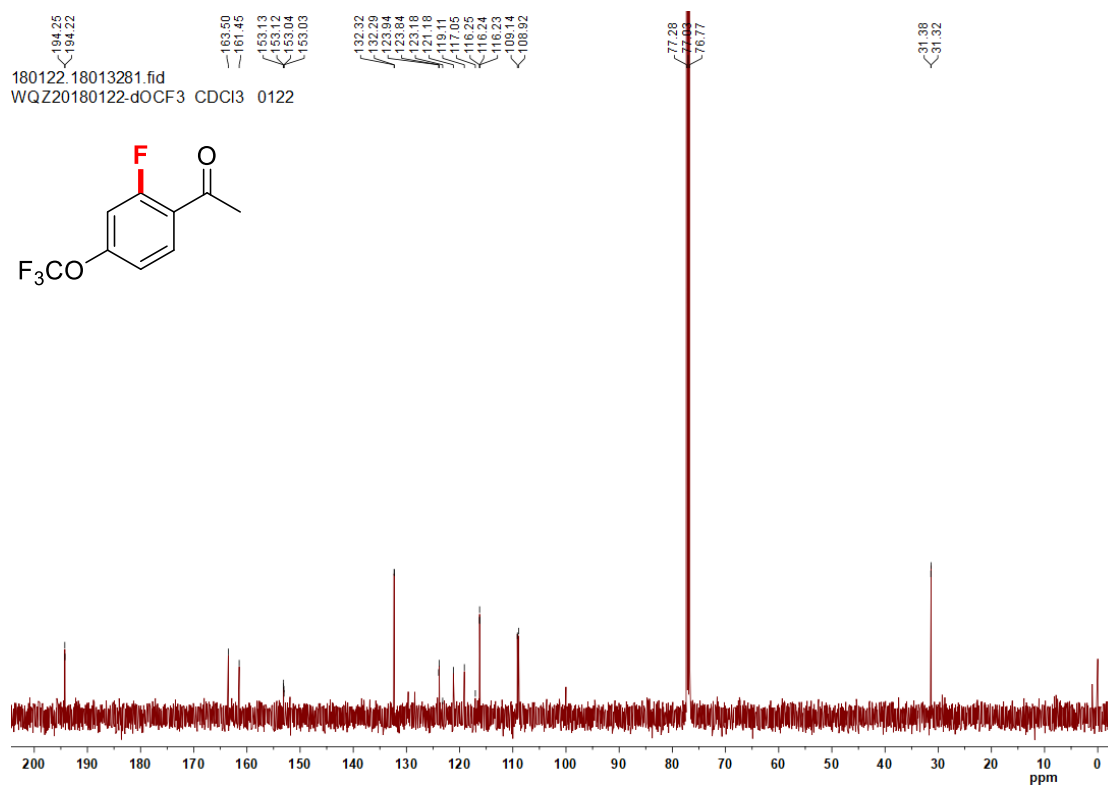

Oct18-2018.20.fid

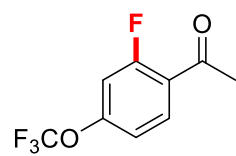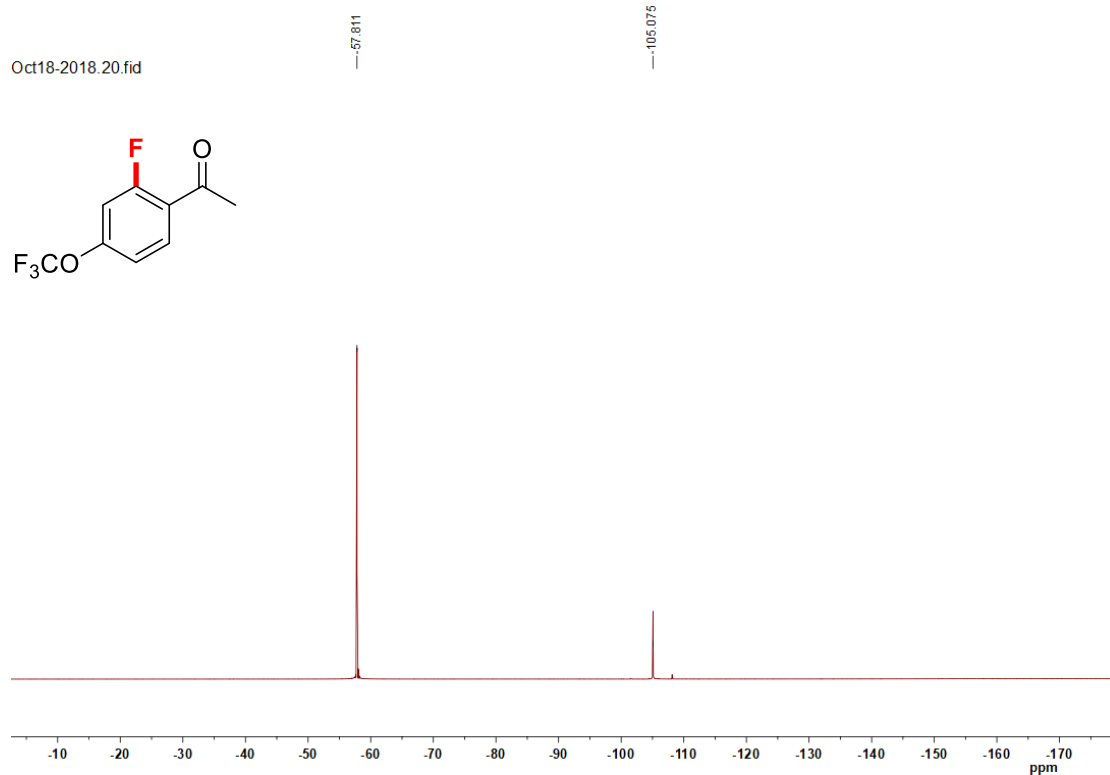

170911.17122191.fid  
WQZ20170911-1C CDCl3 0911

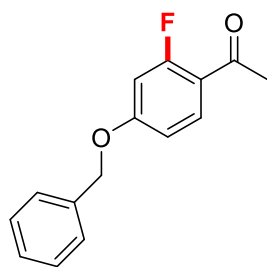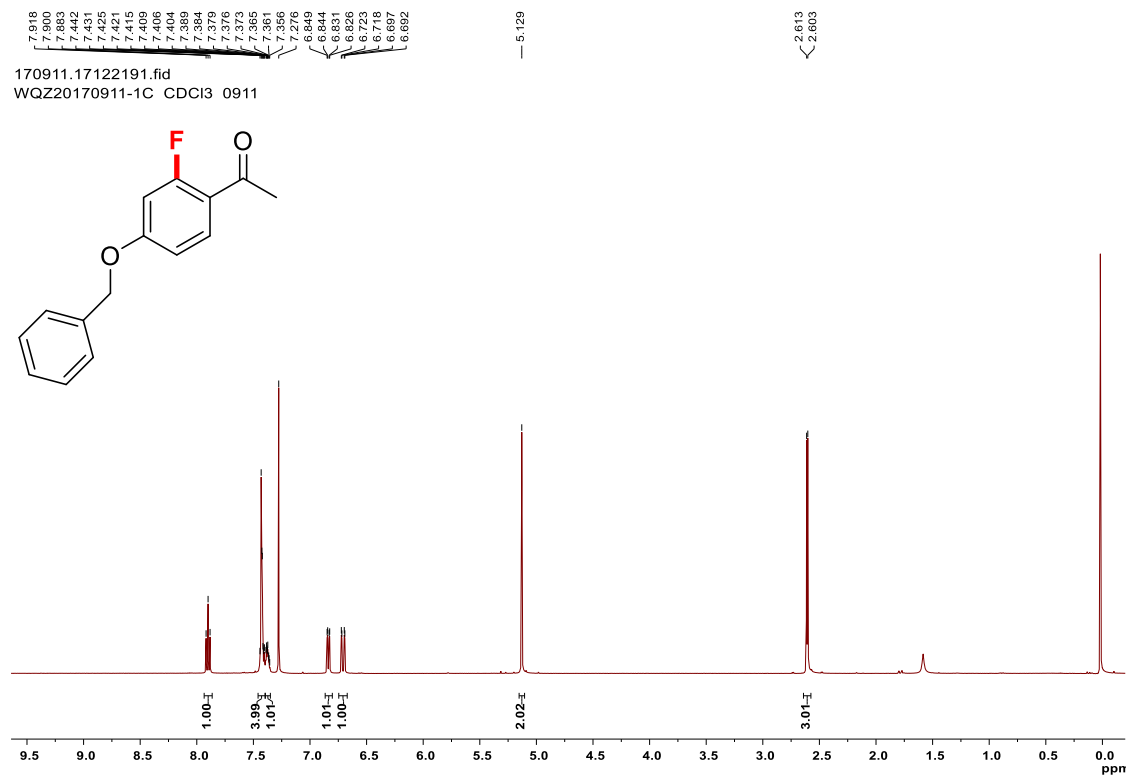

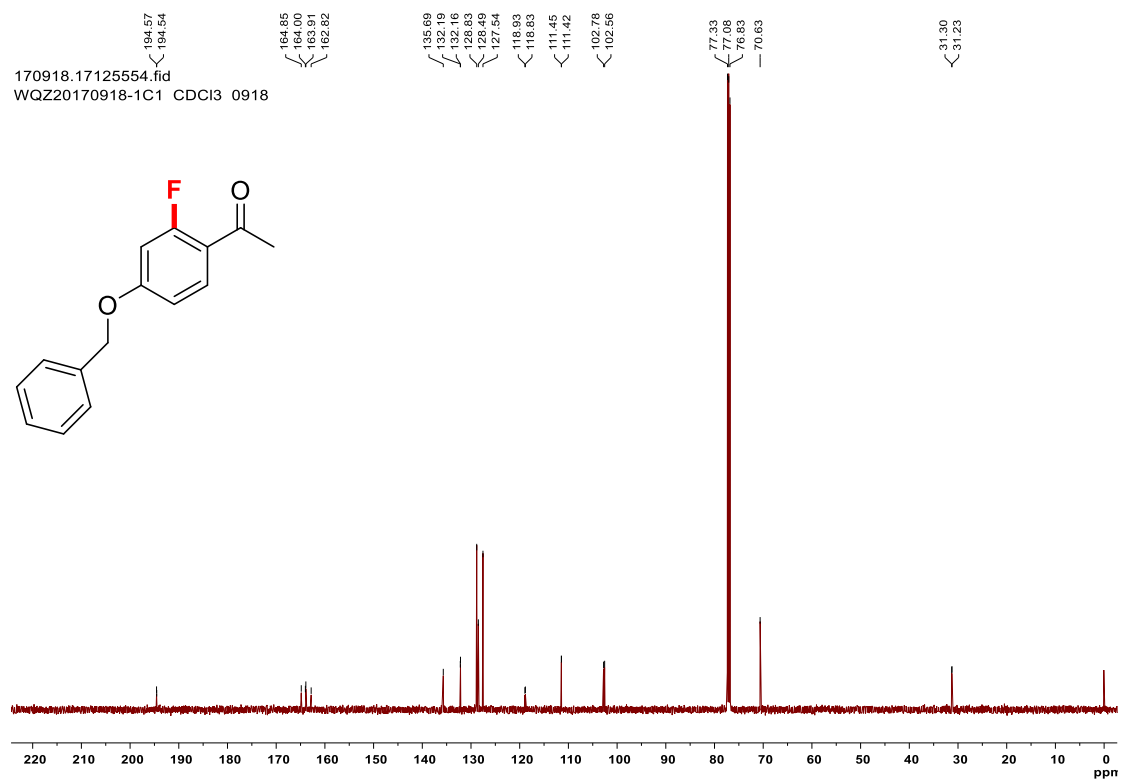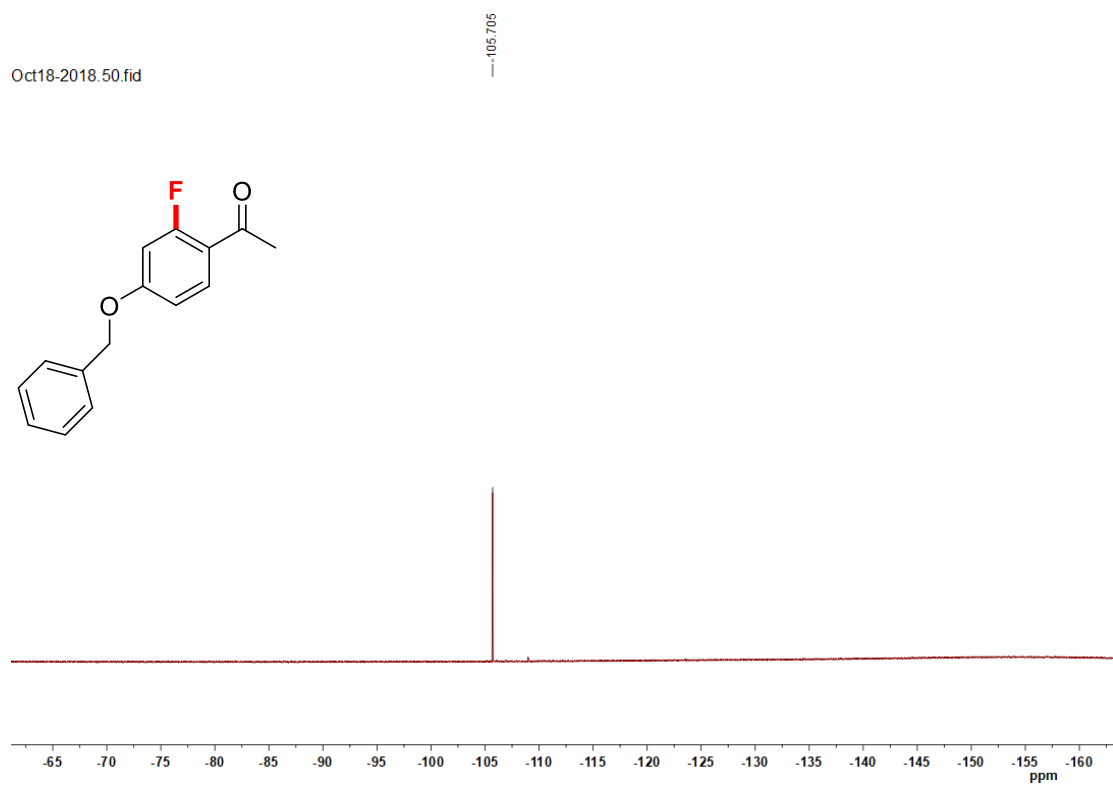



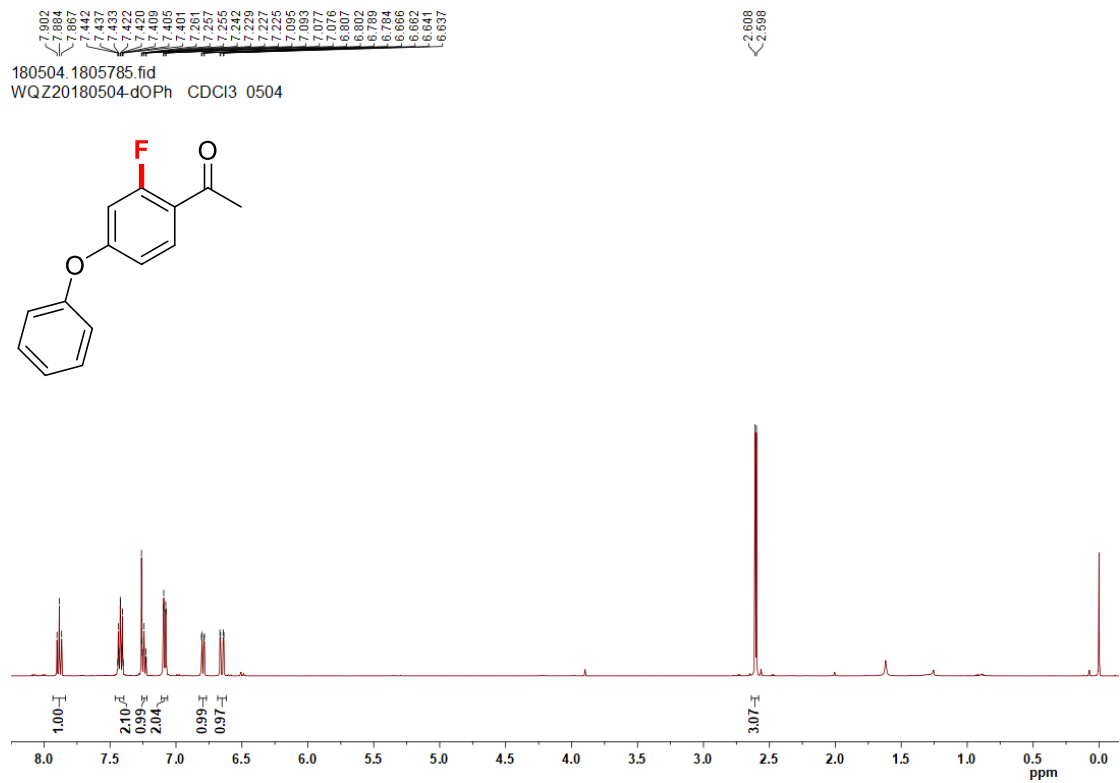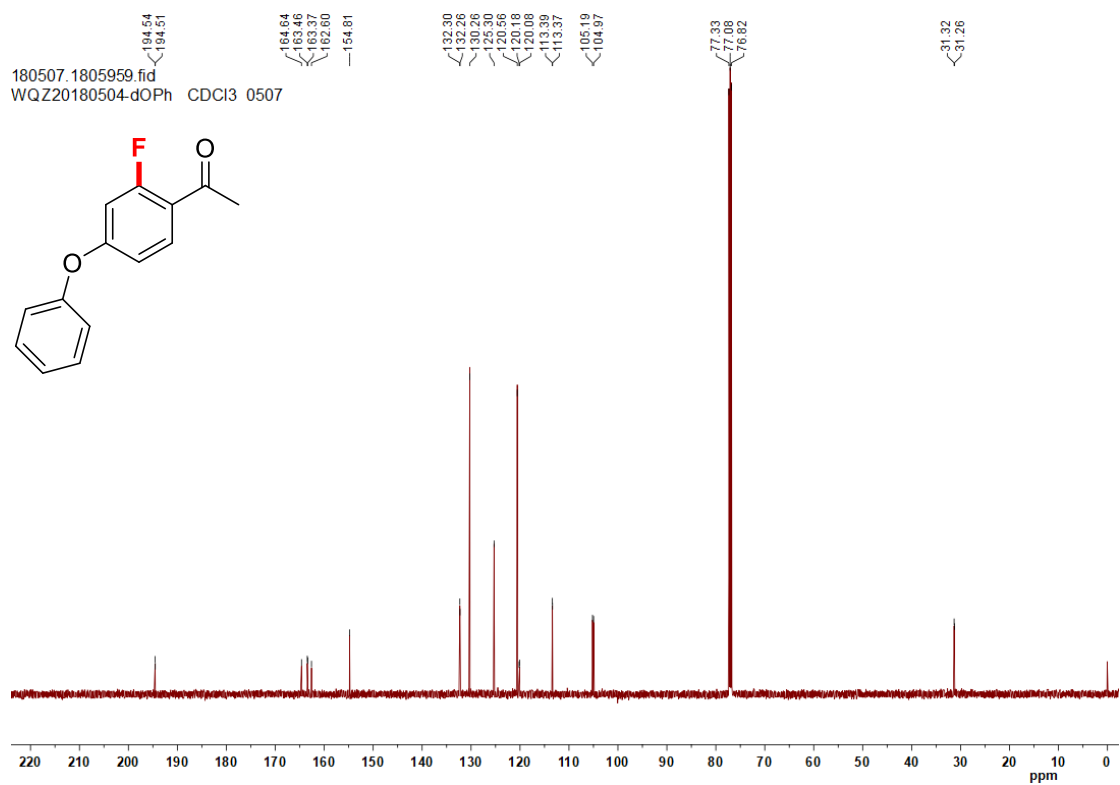

Oct18-2018.150.fid

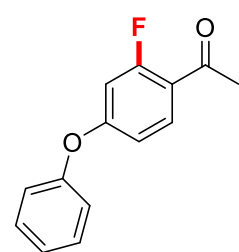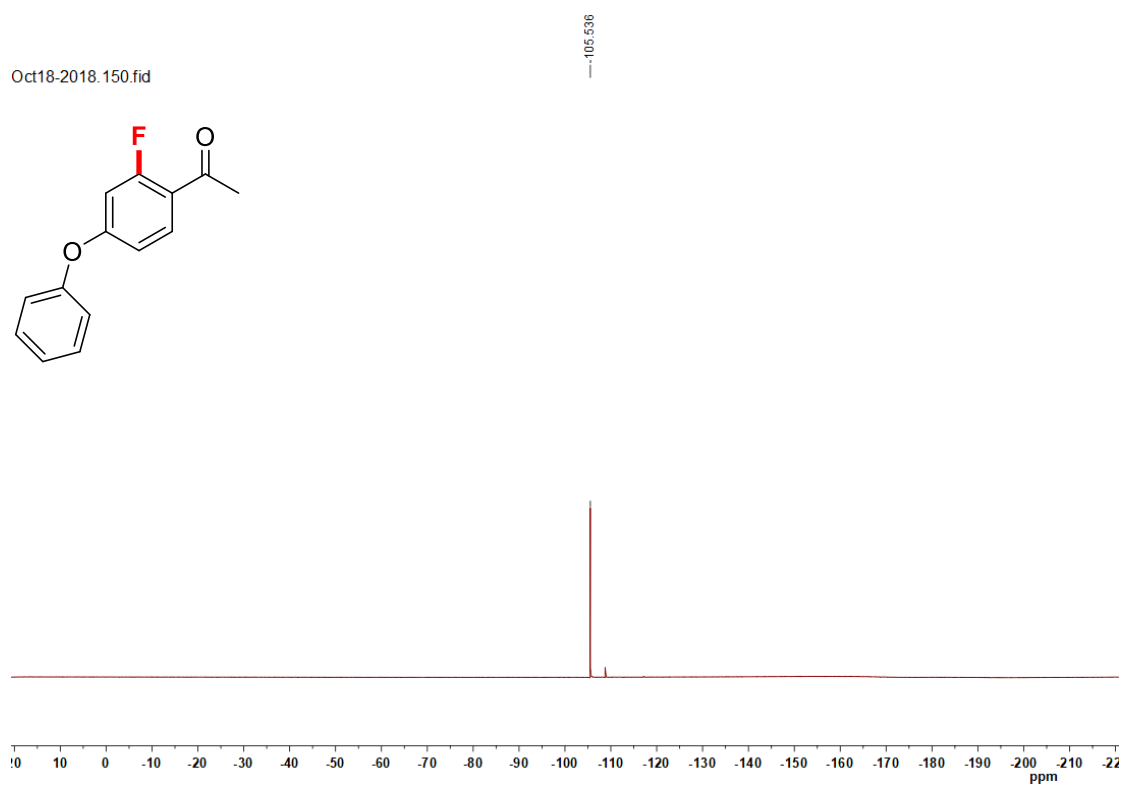

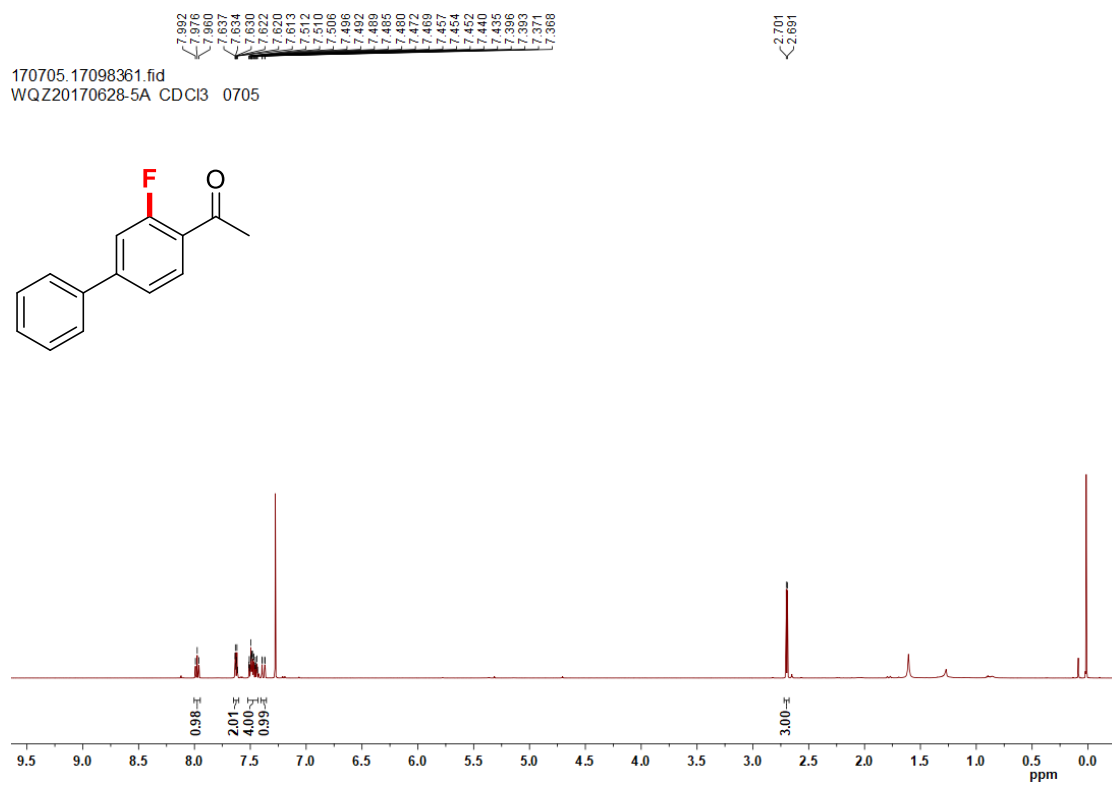

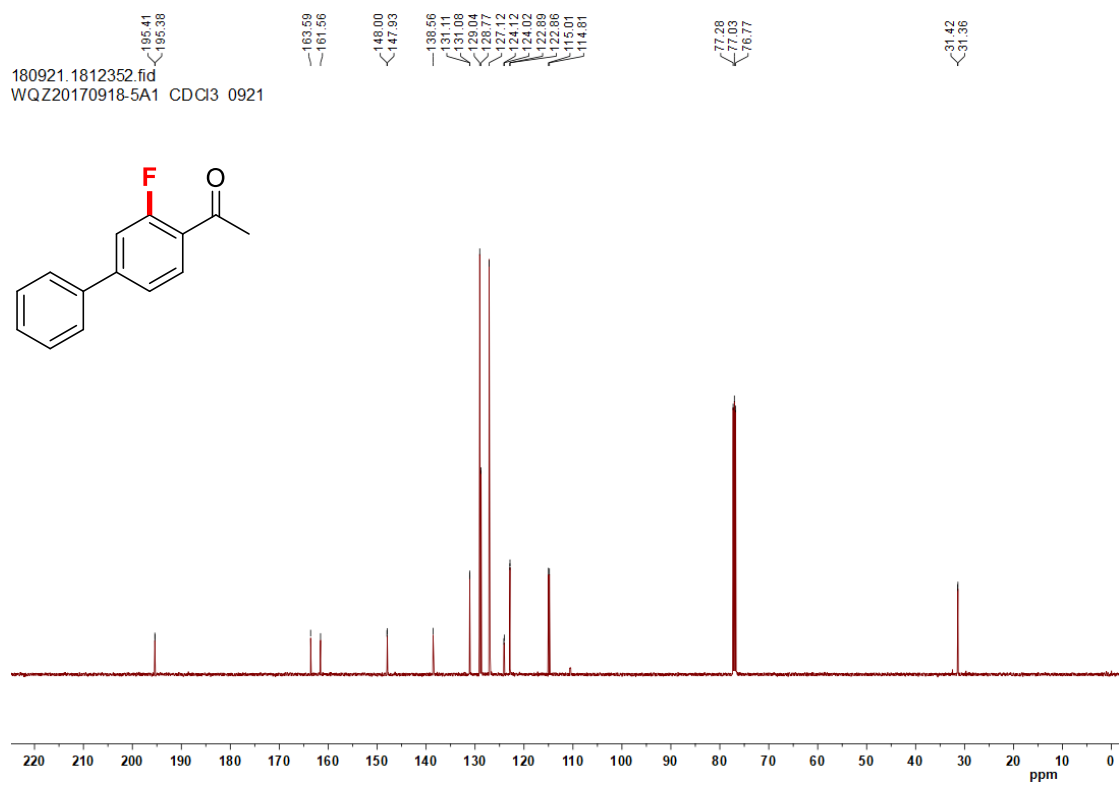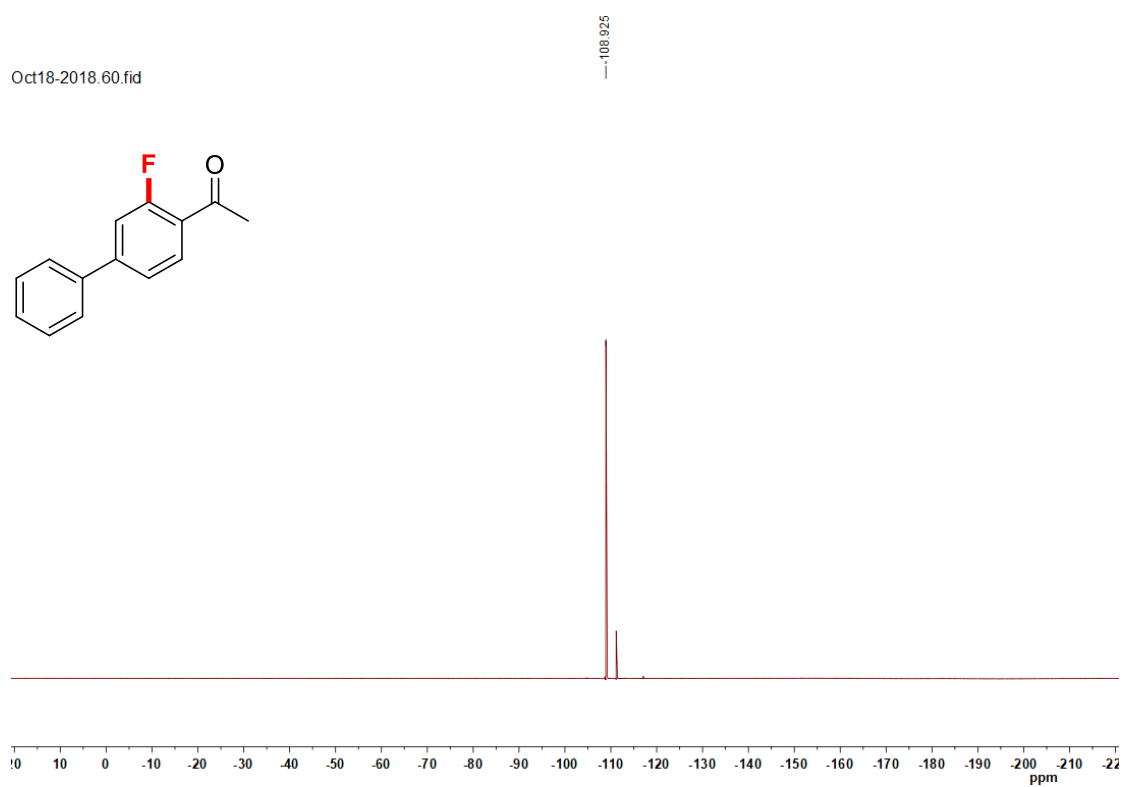

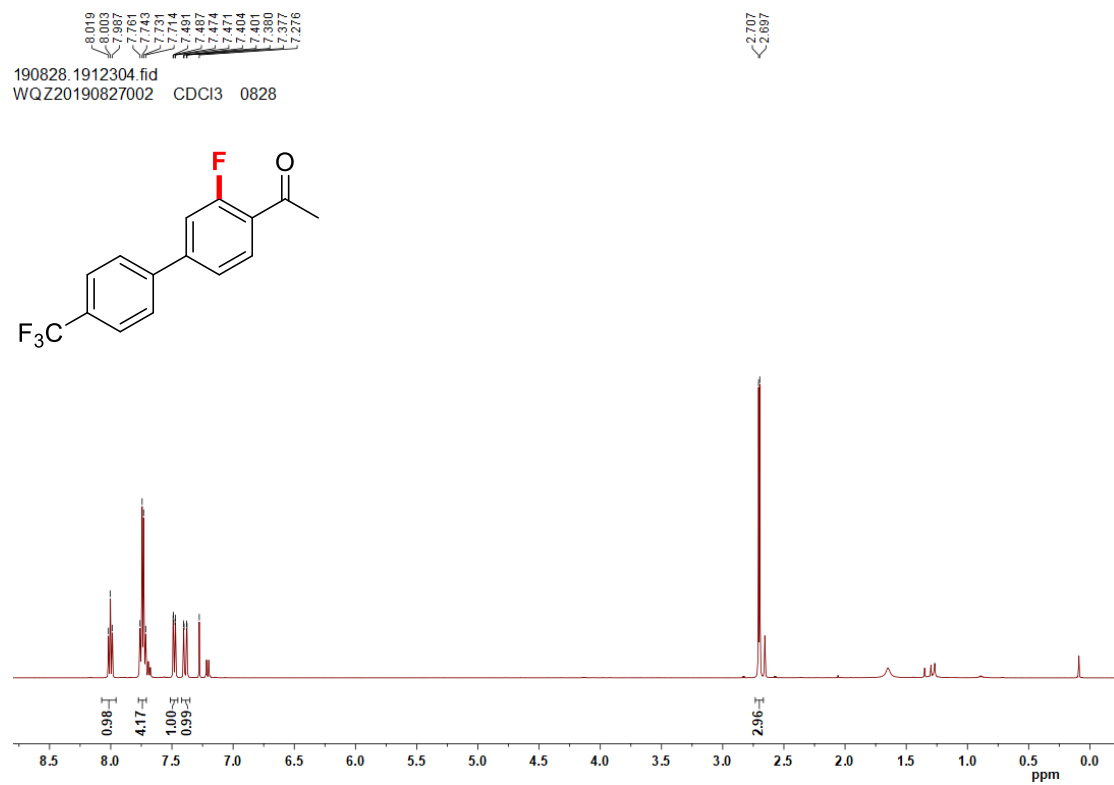

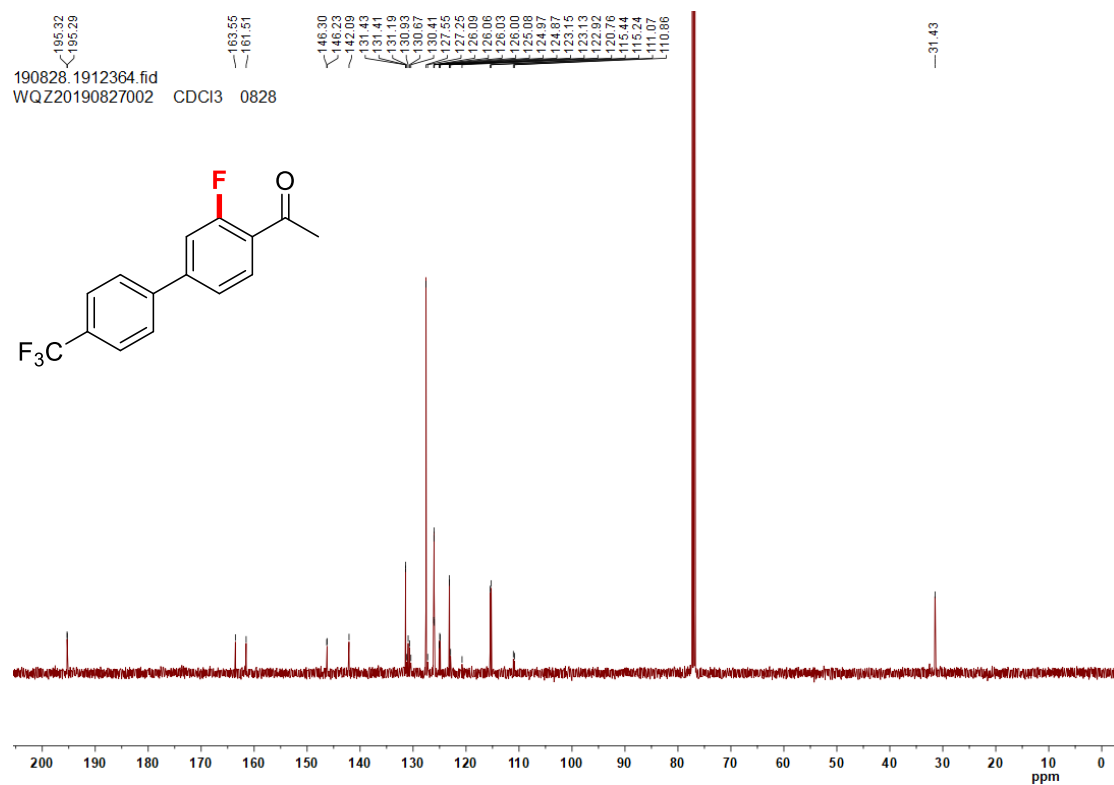

KN-20191015-1910085577-A.10.1.1r

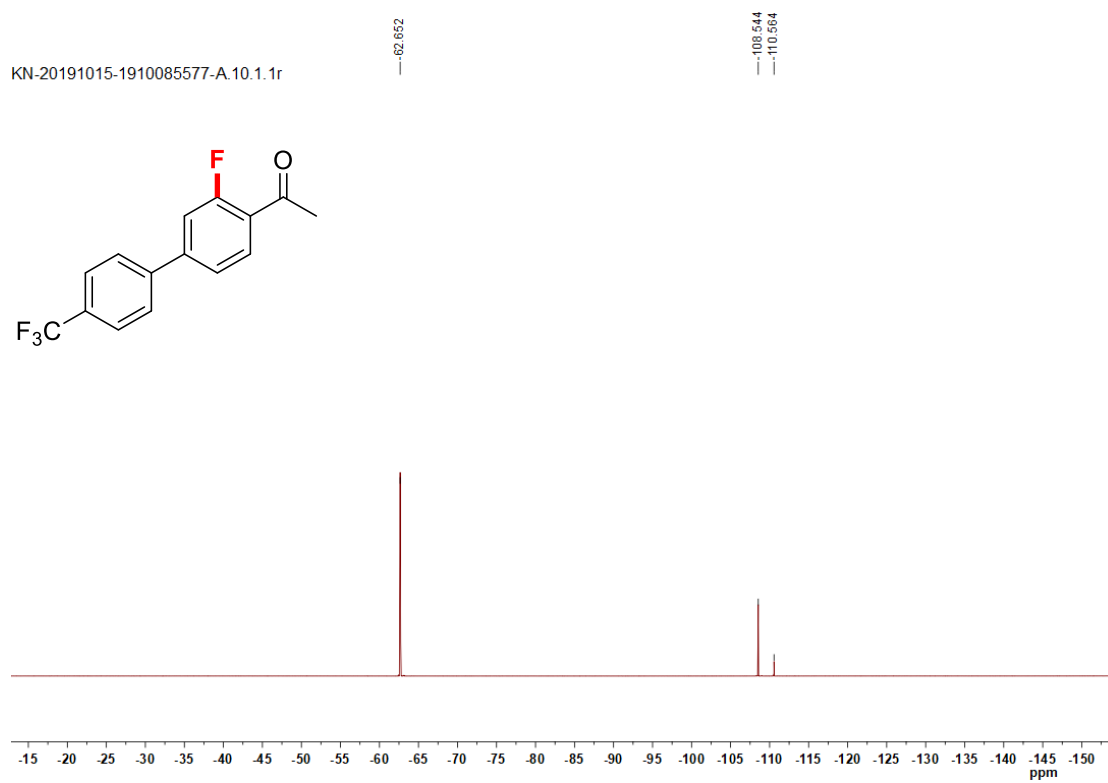

171214.17172063.fid  
WQZ-20171214-dF CDCl<sub>3</sub> 1214

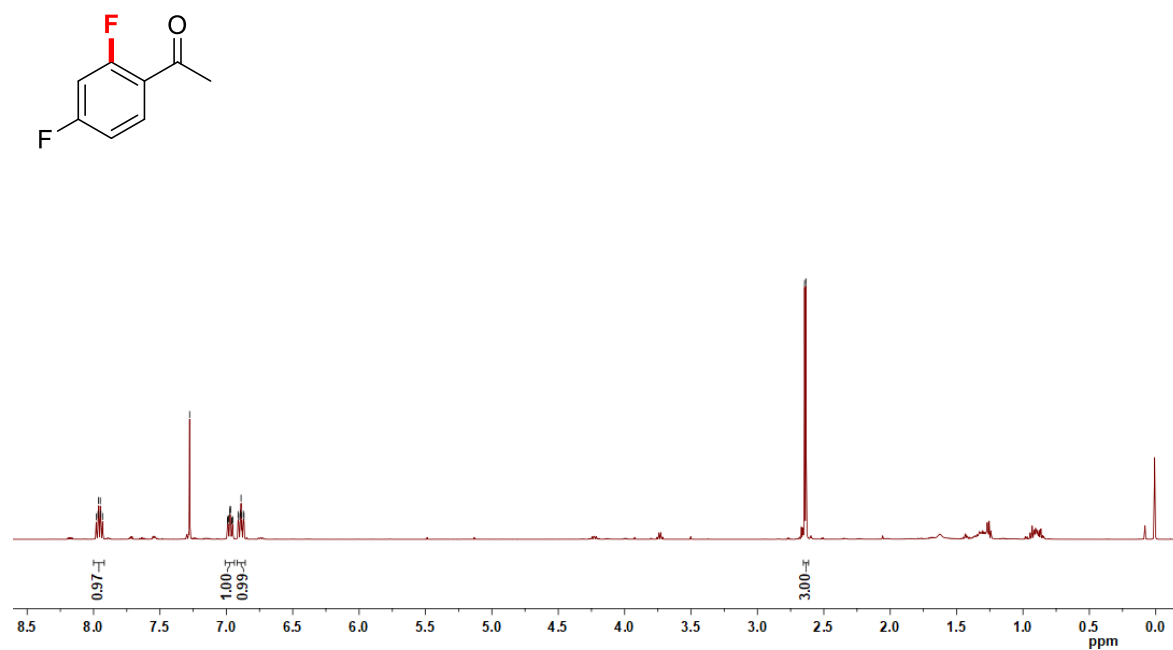



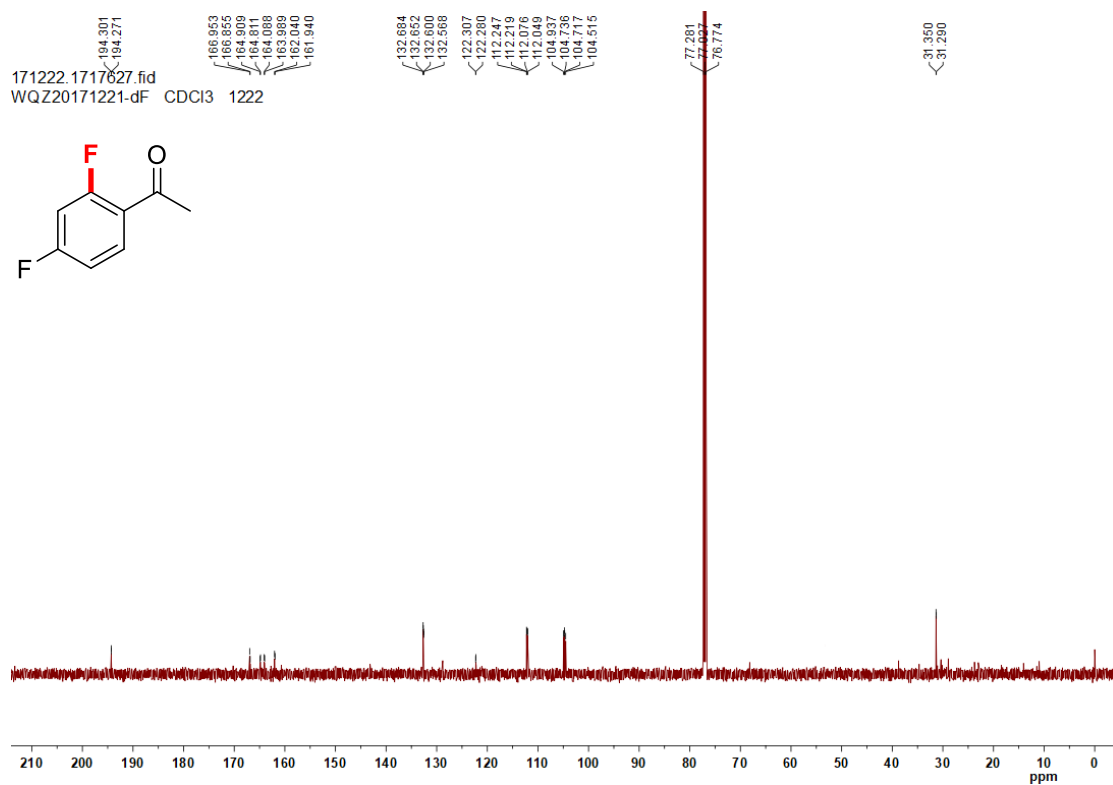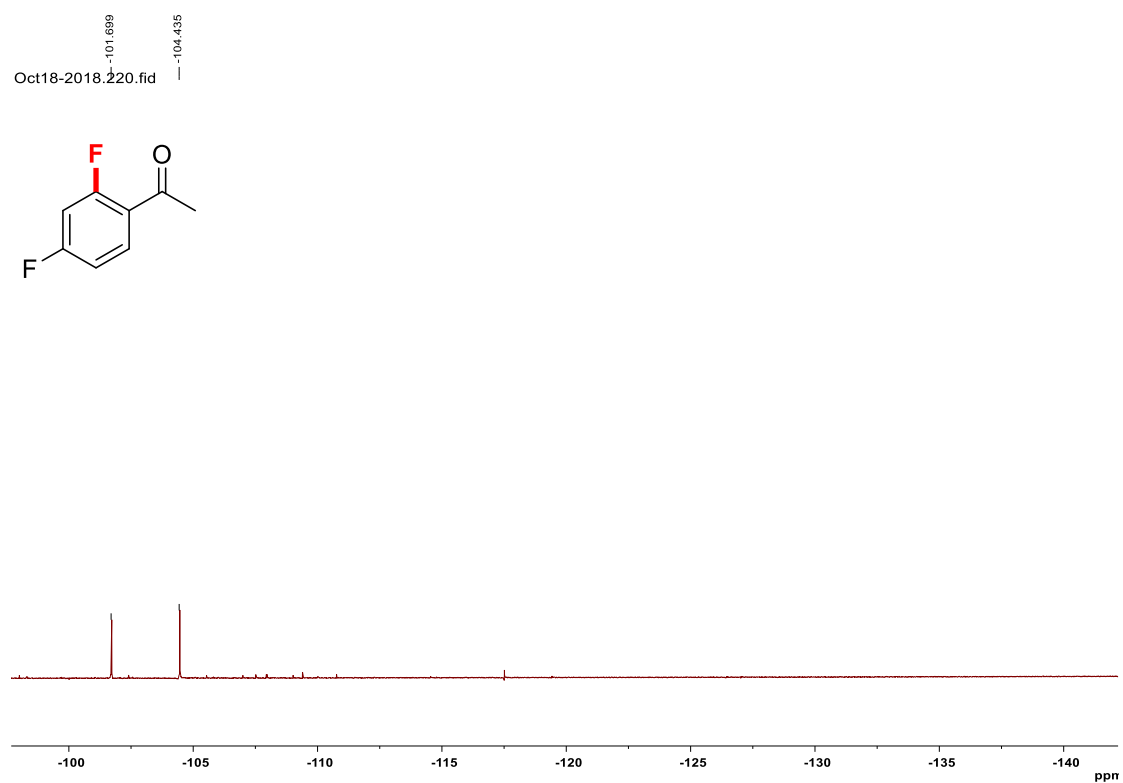

CC(=O)c1ccc(Cl)cc1F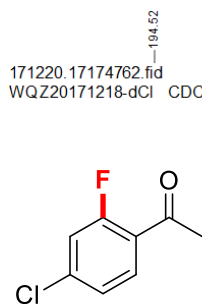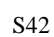

Oct18-2018.70.fid

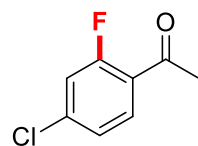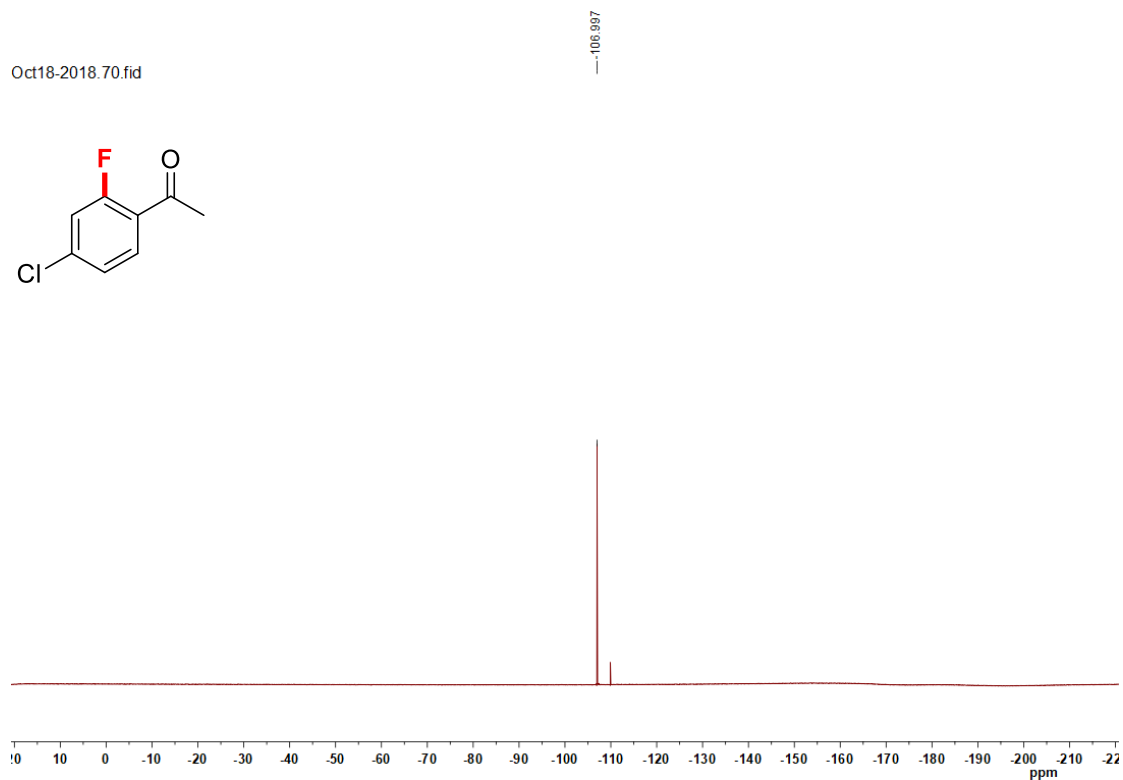

171129.1716349.fid  
WQZ20171129-dBr CDCl3 1129

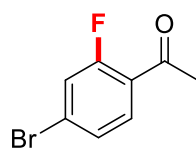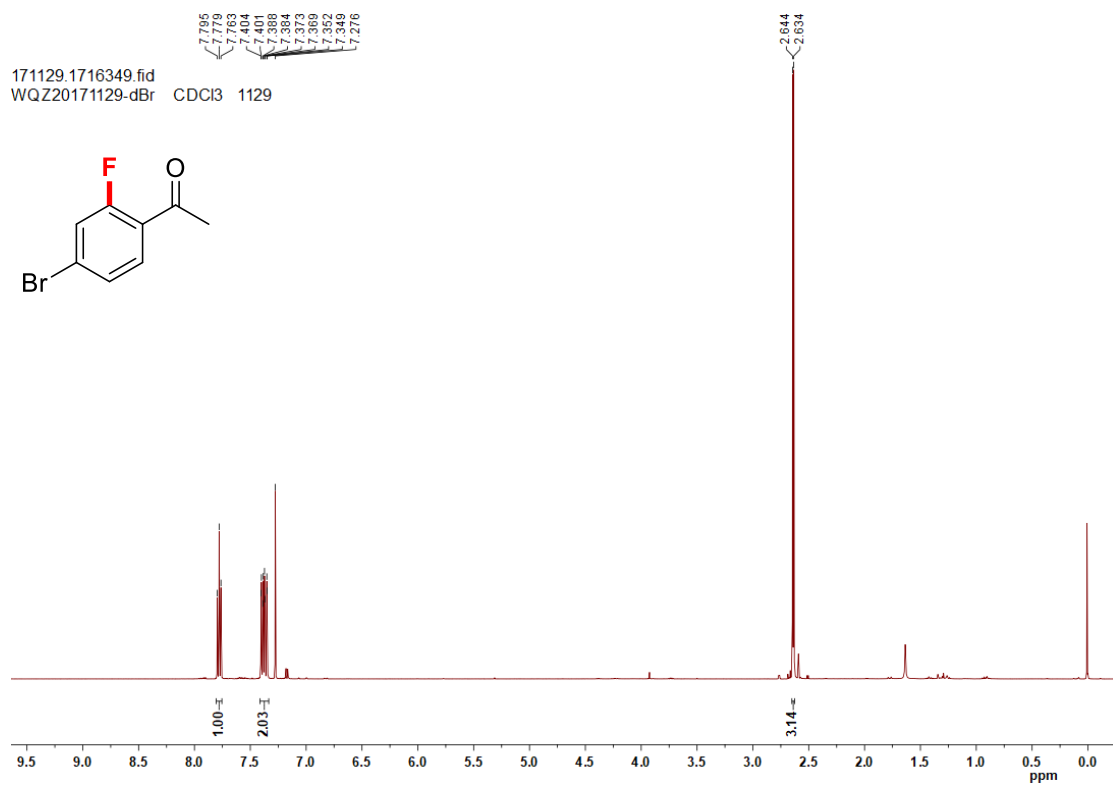

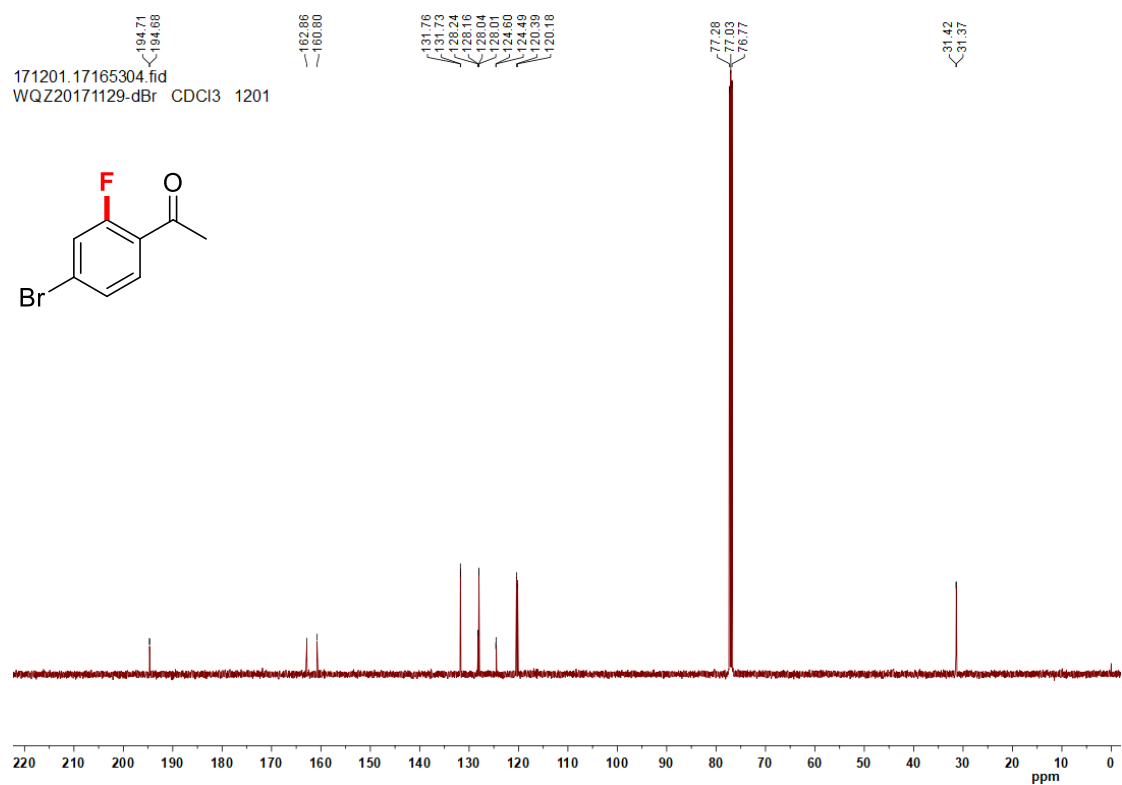

Oct18-2018.90.fid

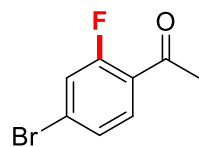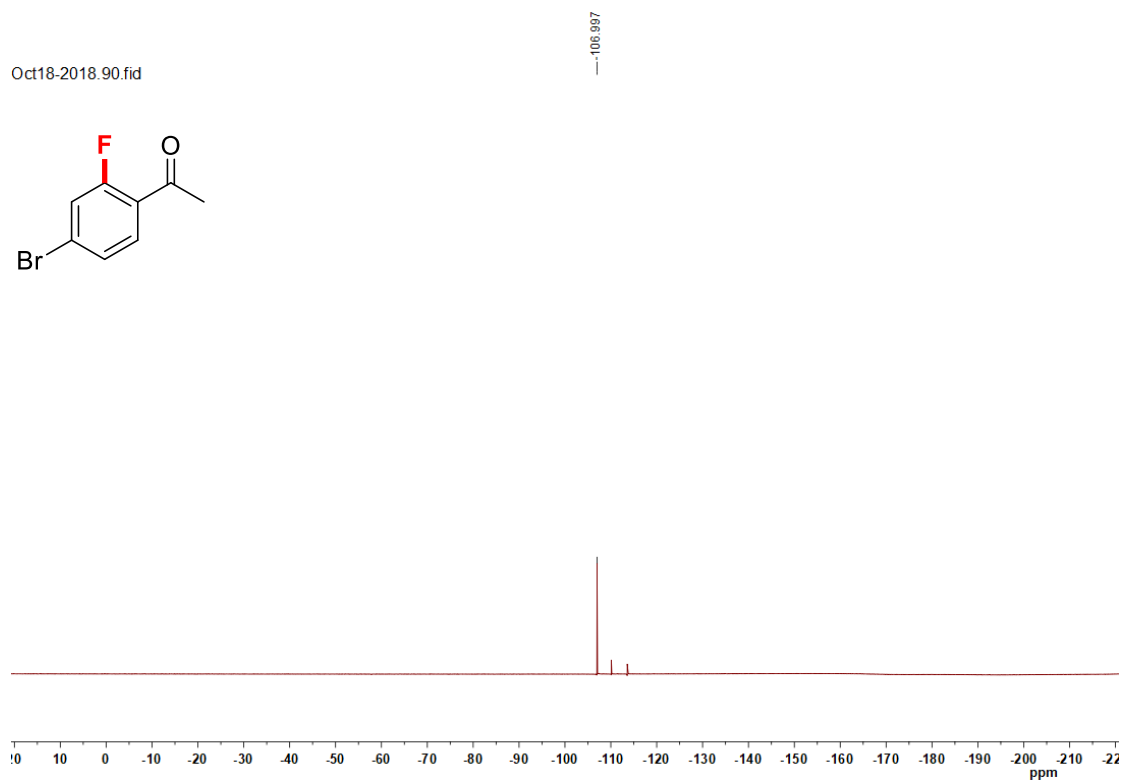

171220.17174761.fid  
WQZ20171218-dCl CDCl<sub>3</sub> 1220

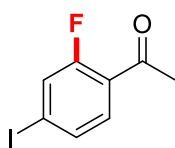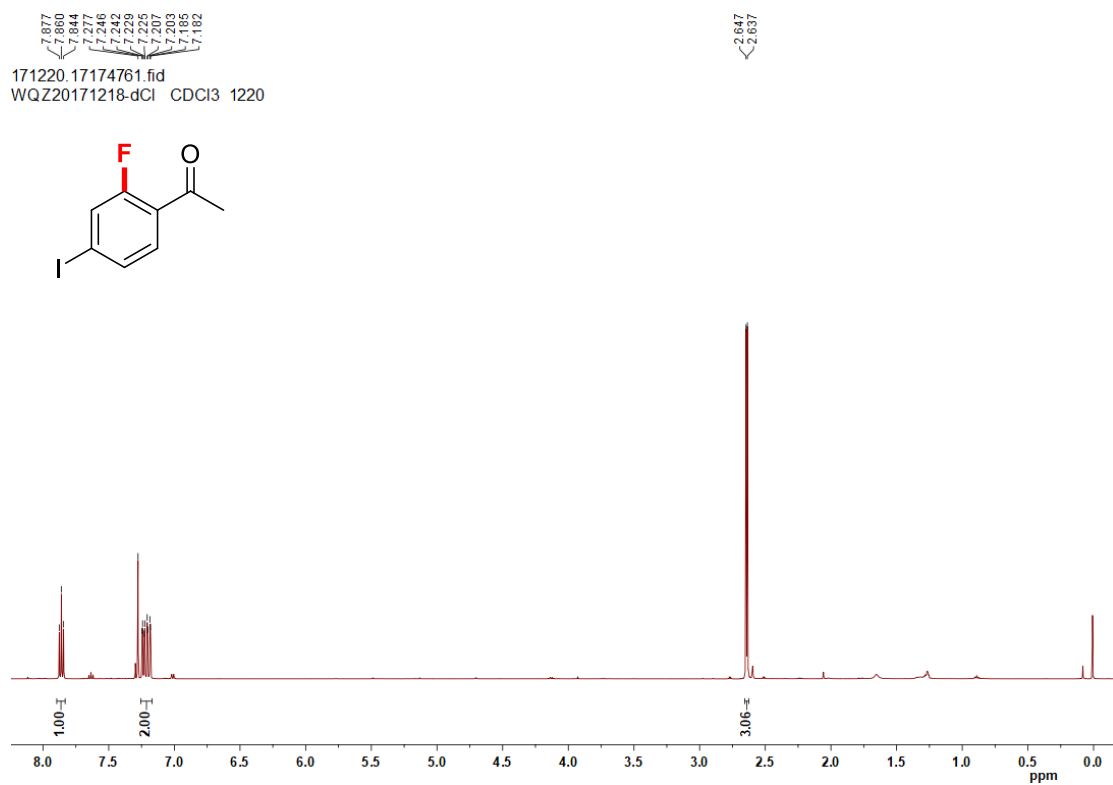

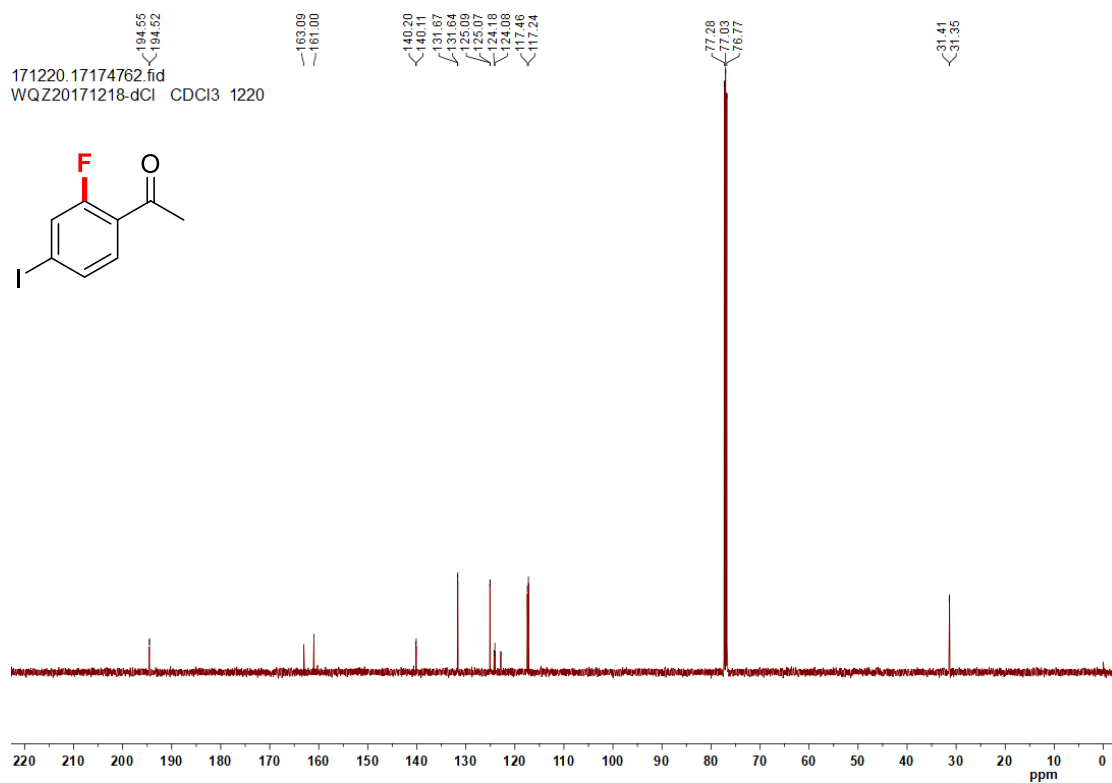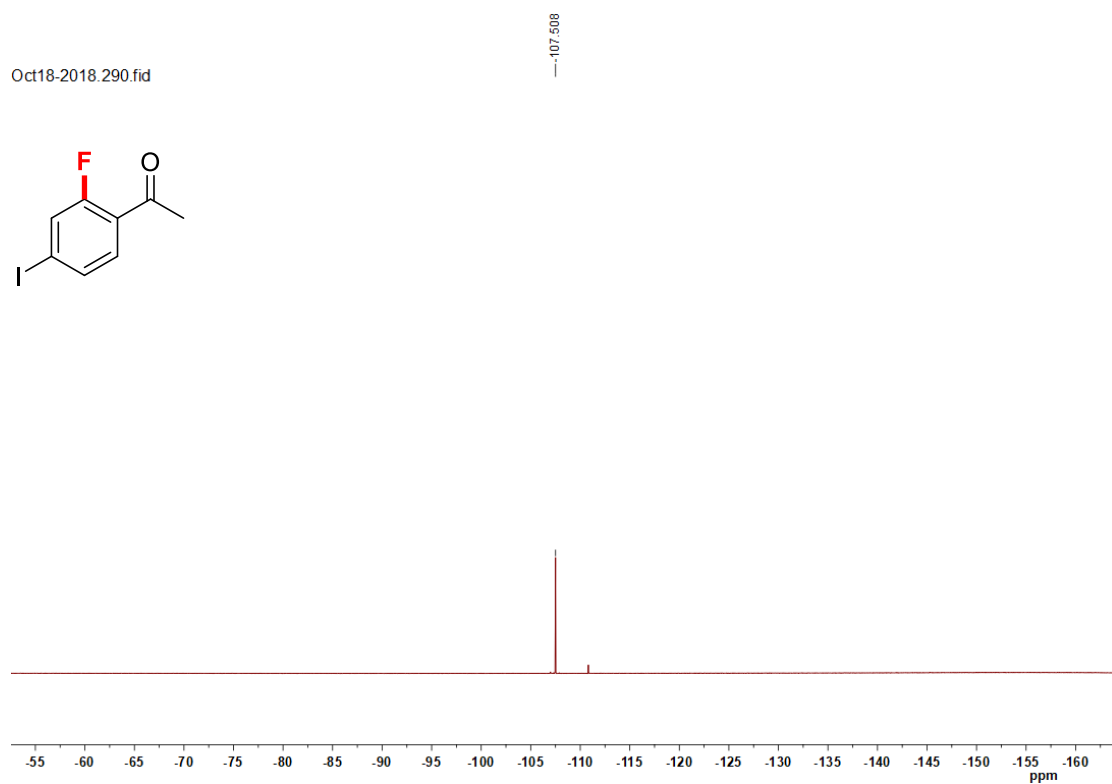

7.293  
7.277  
7.265  
7.022  
7.007  
6.963  
6.944  
6.926  
171204.17165631.fid  
WQZ20171201-LCH3 CDCl3 1204

2.568  
2.562  
2.349

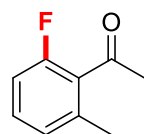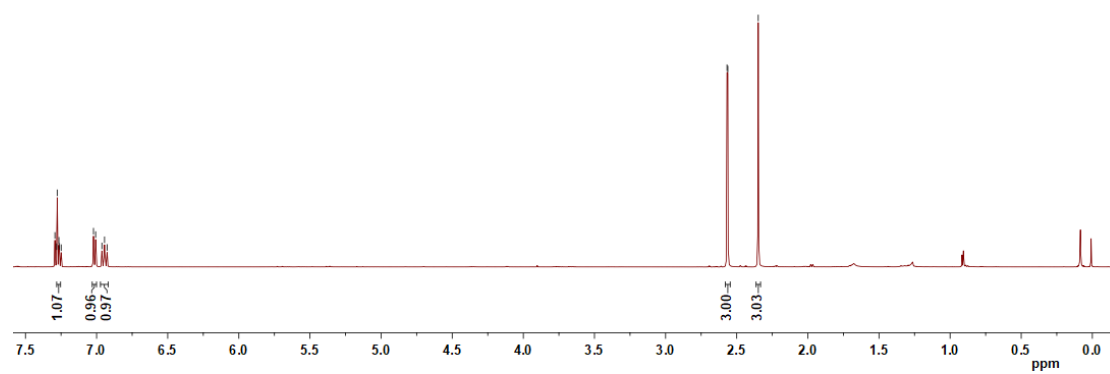

171211.1716955.fid  
WQZ20171129-LCH3 CDCl3 1211

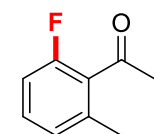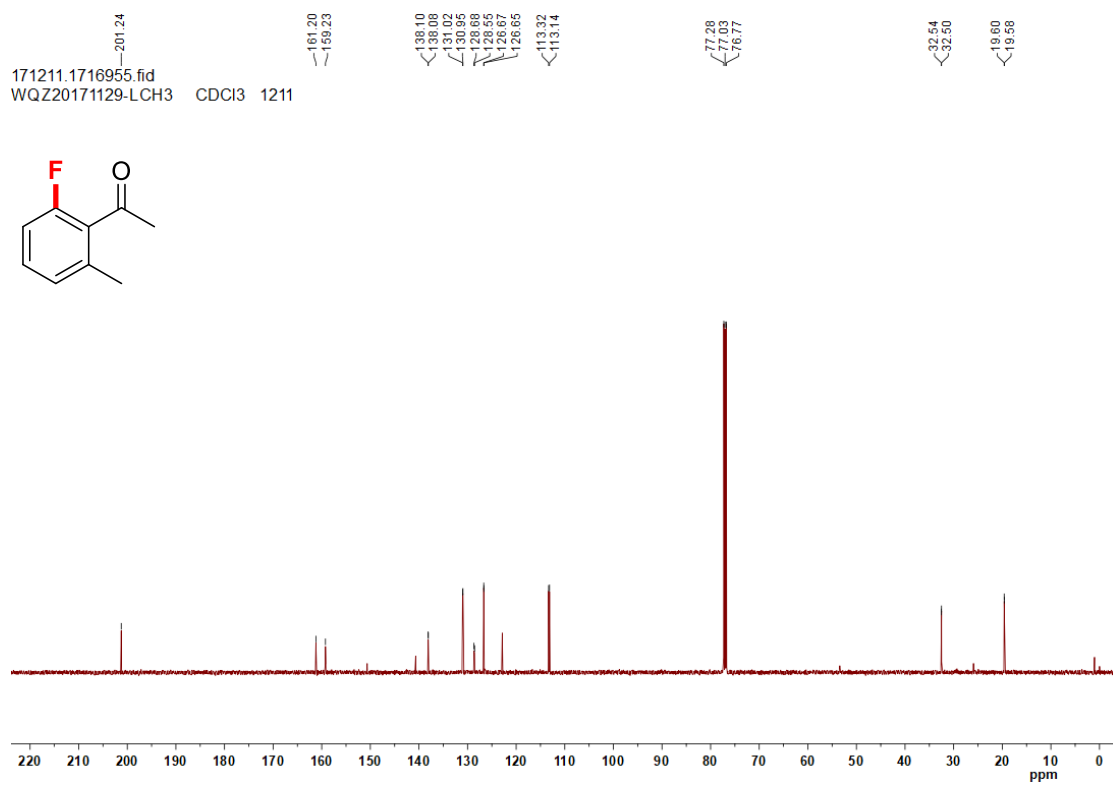

Oct18-2018.180.fid

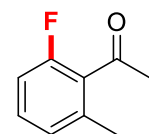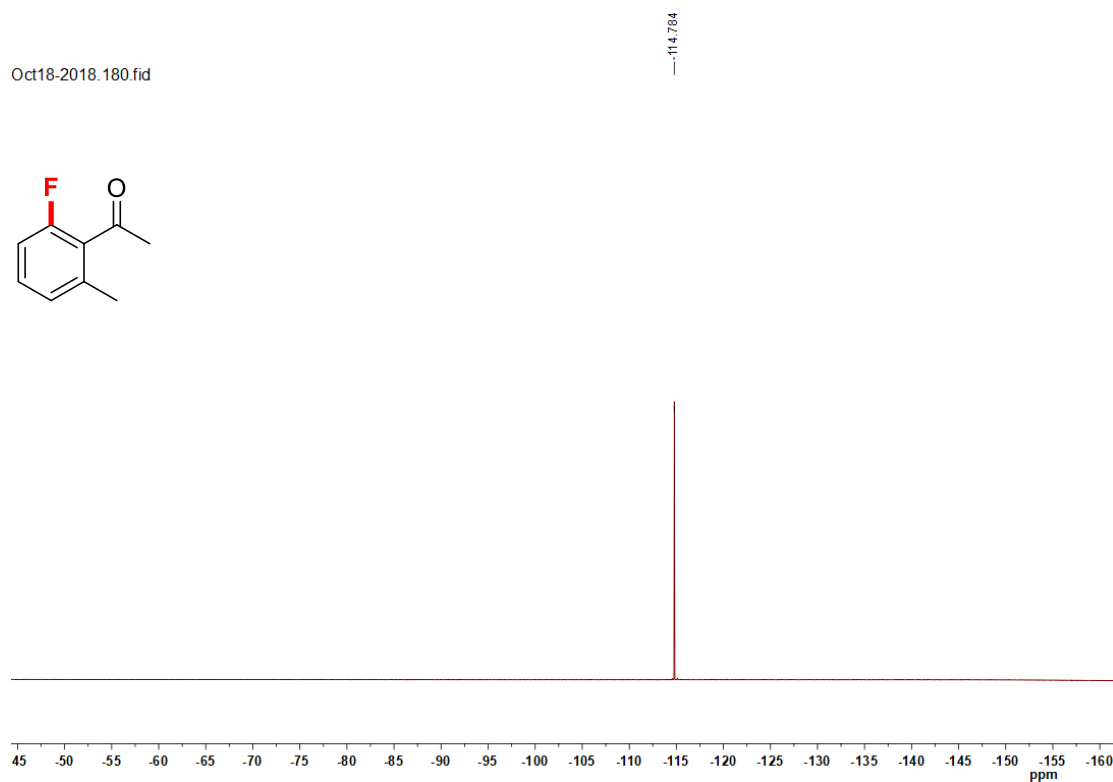



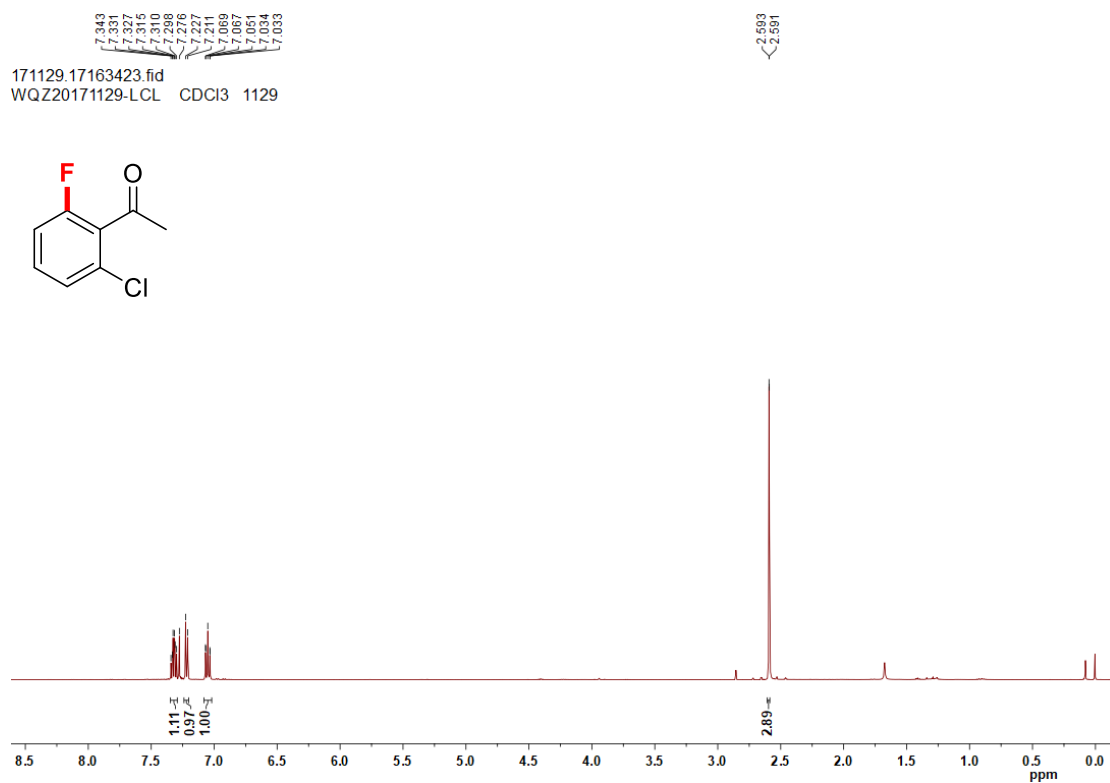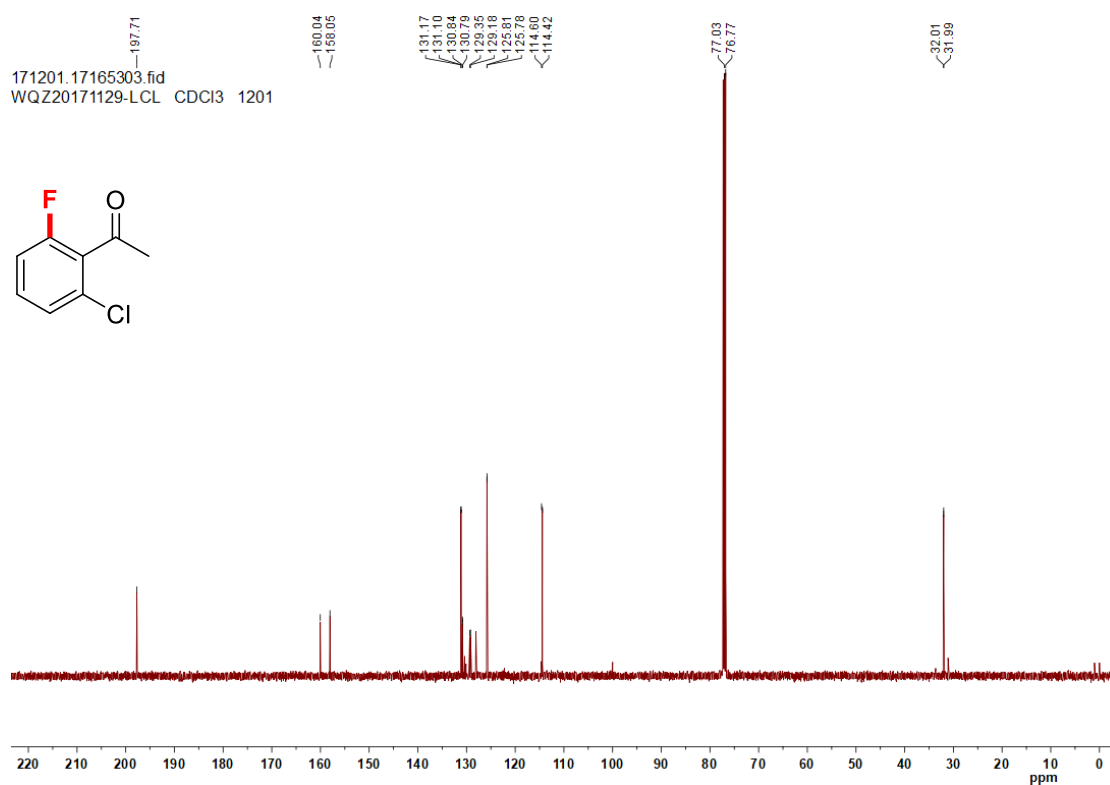

Oct18-2018.230.fid

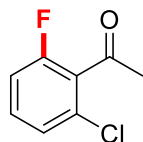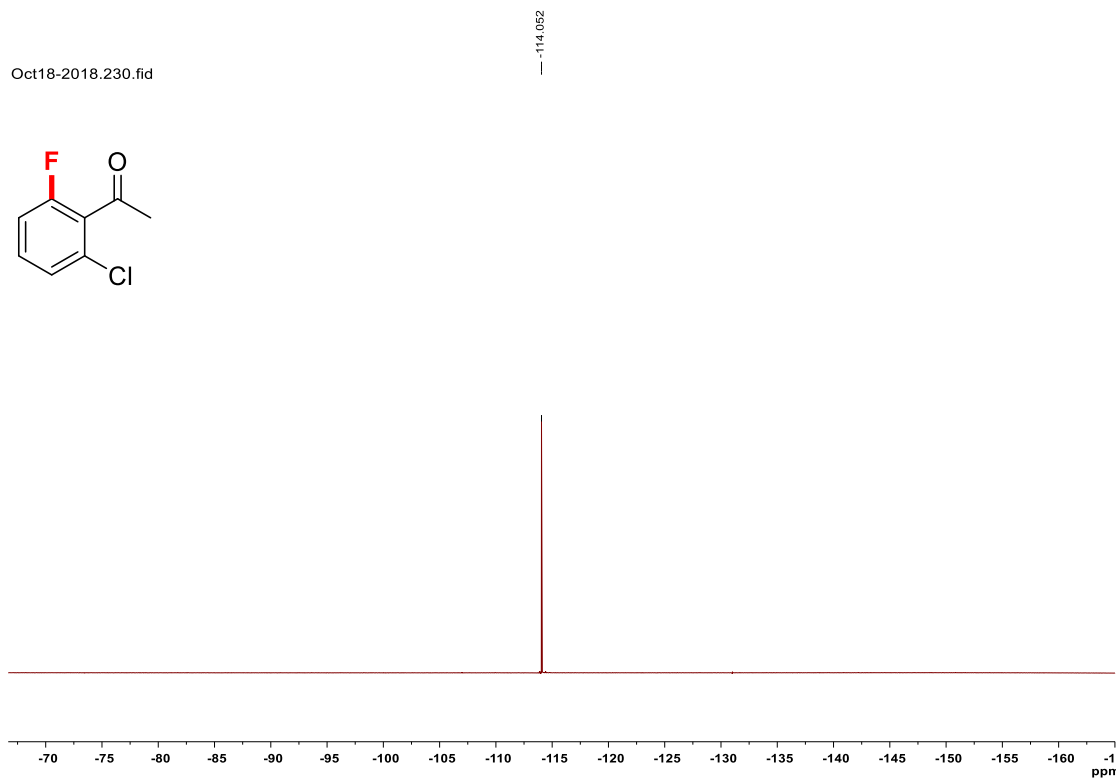

171127.17161802.fid

WQZ20171126-JCH3 CDCl<sub>3</sub> 1127

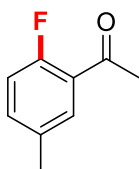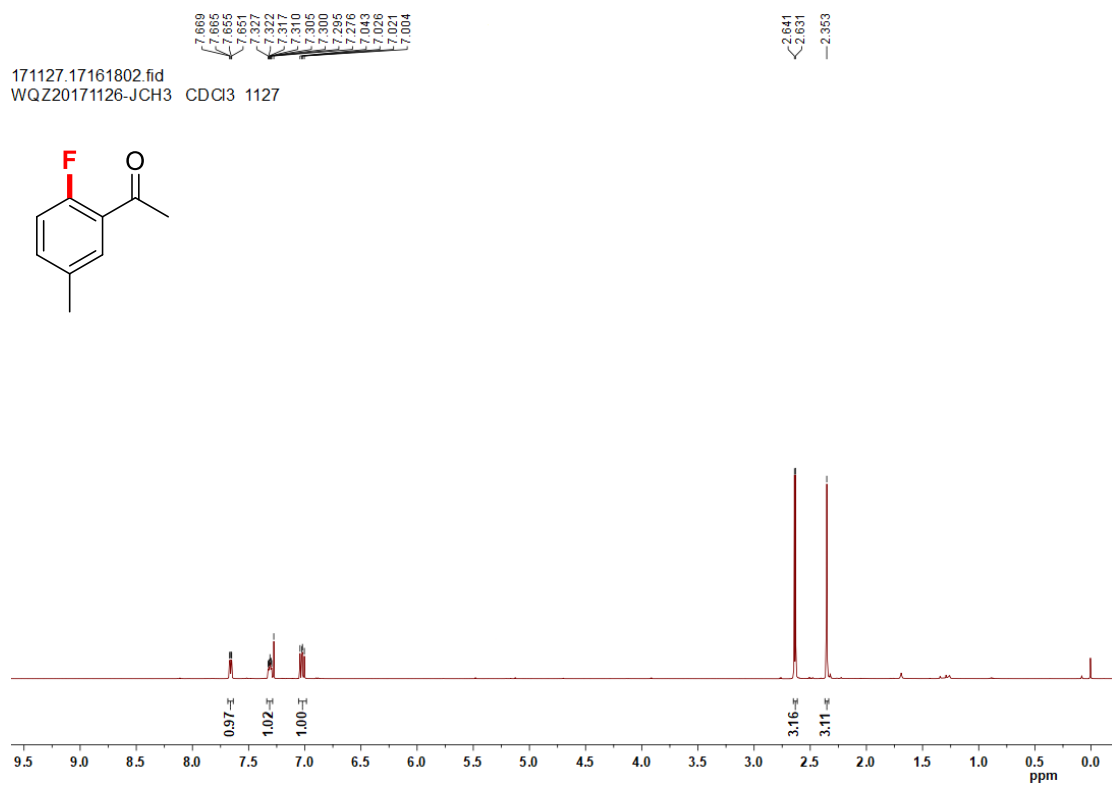

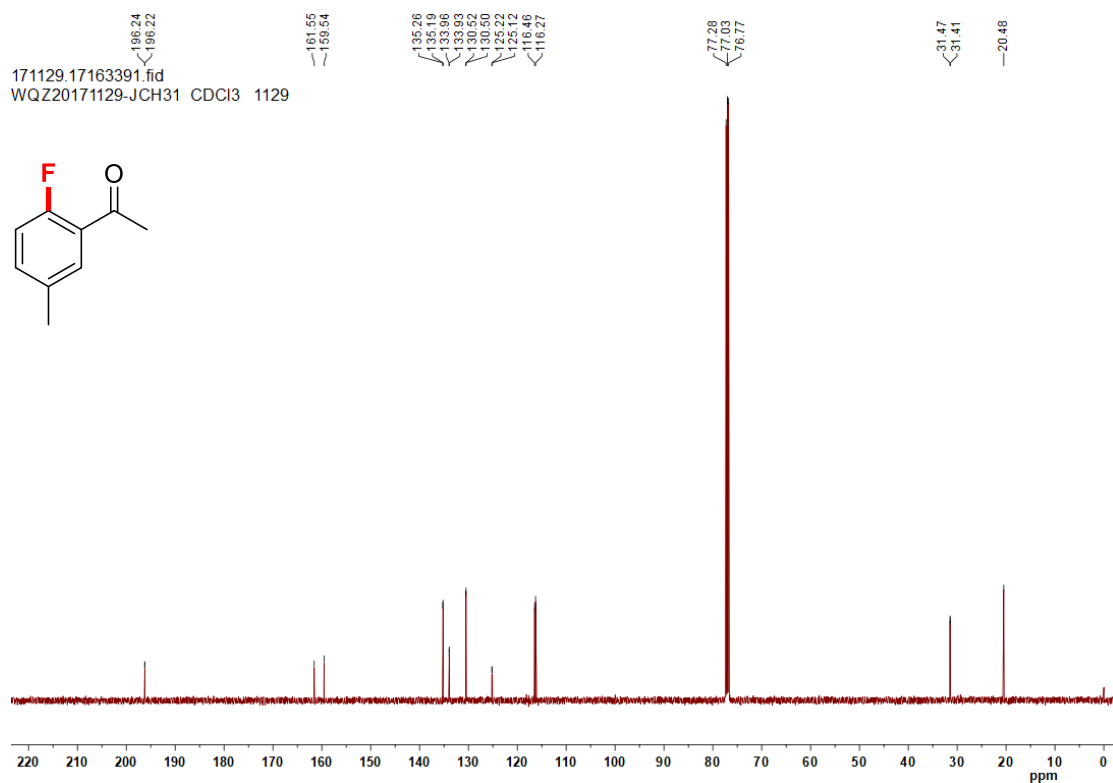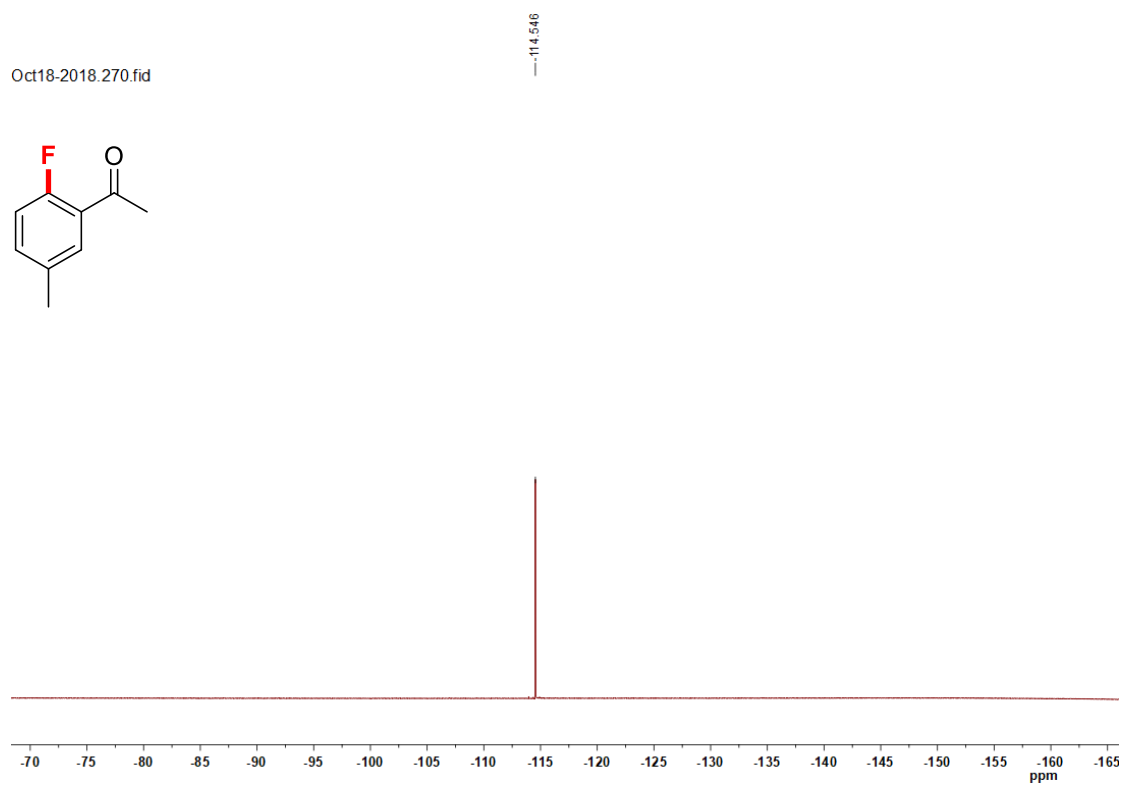

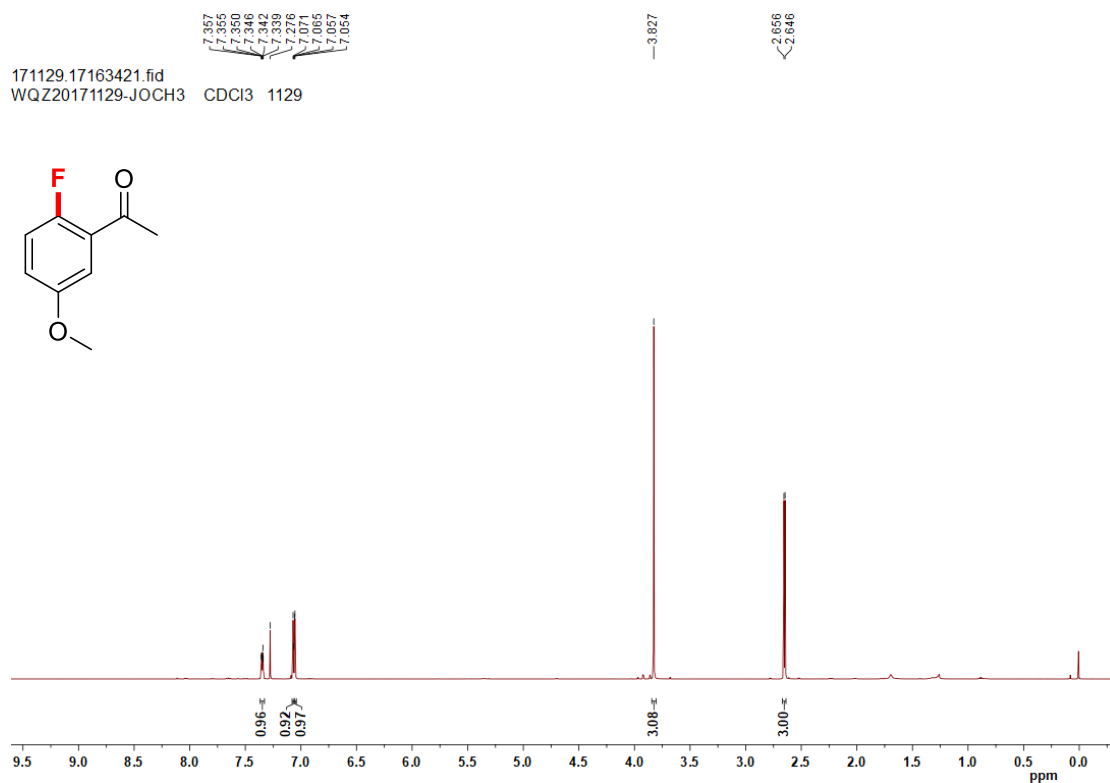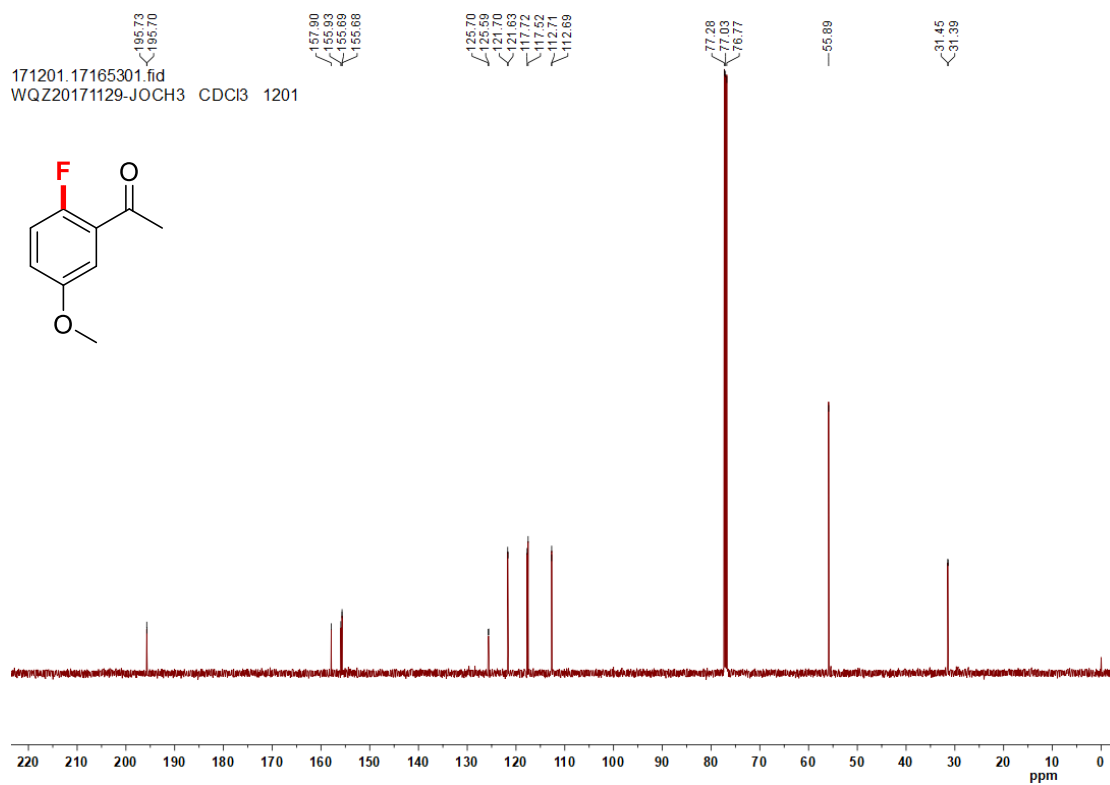

Oct18-2018.170.fid

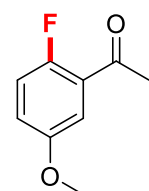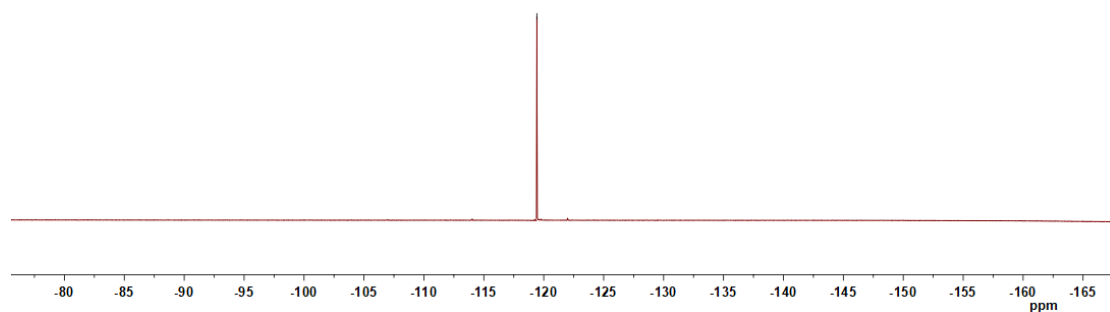

180115.18008311.fid  
WQZ20180113-JPh CDCl3 0115

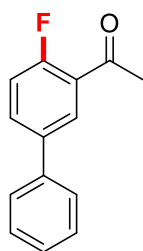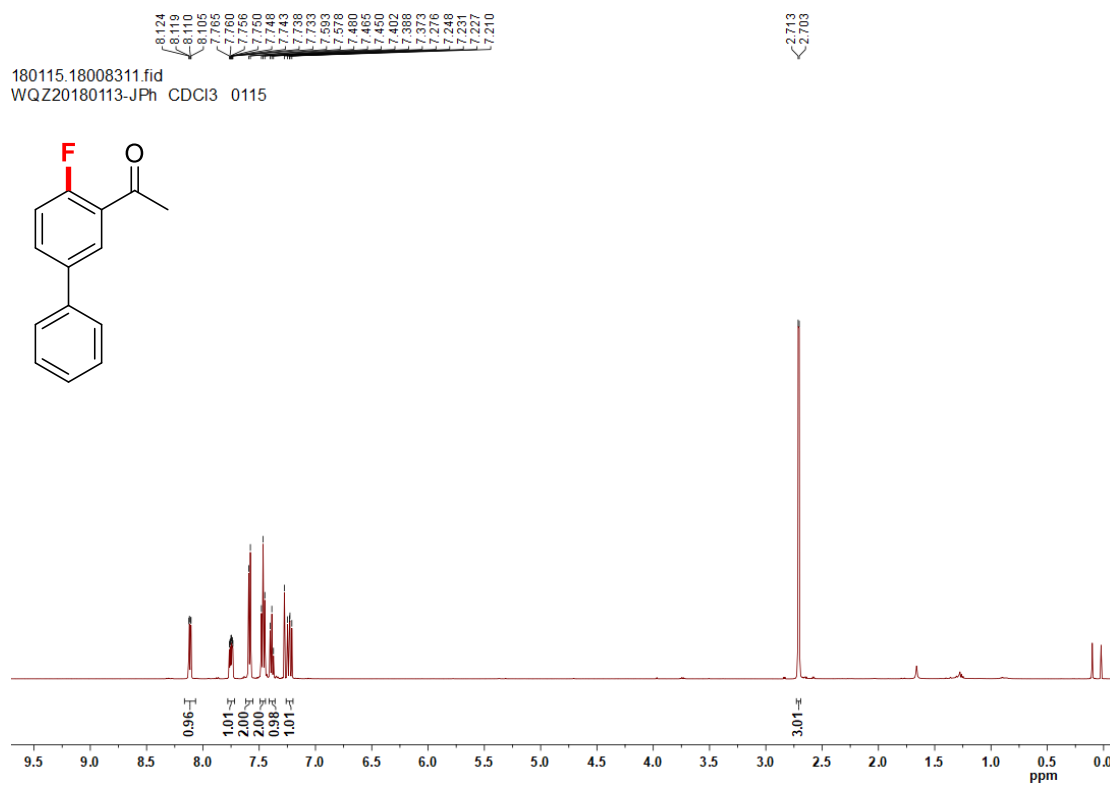

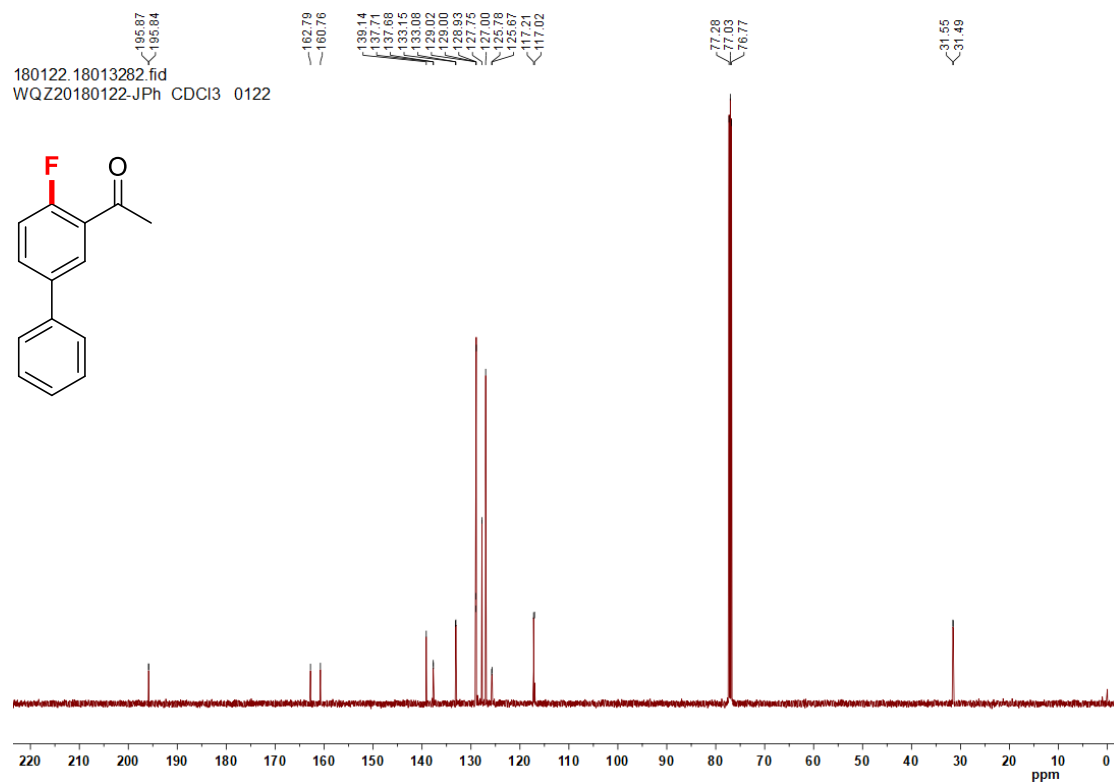

Oct18-2018.190.fid

—112.191

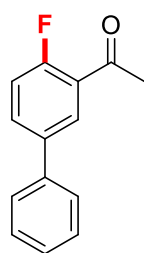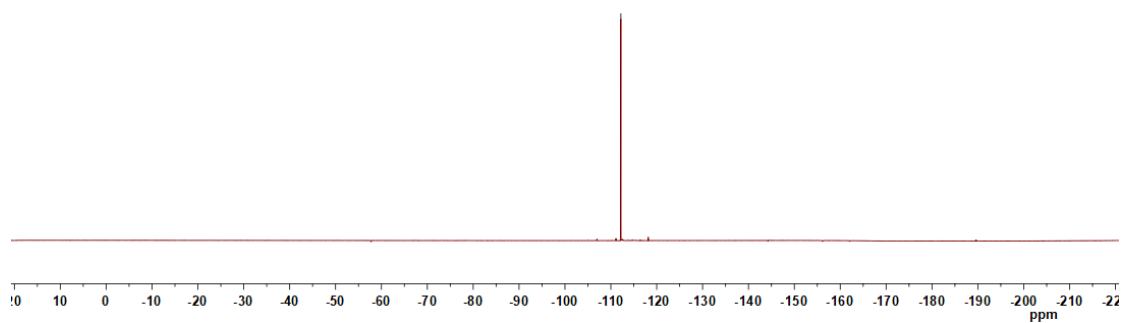

180131.18019301.fid

WQZ20180131-JCI CDCl3 0131

7.862  
7.857  
7.850  
7.844  
7.477  
7.472  
7.469  
7.463  
7.480  
7.474  
7.471  
7.466  
7.458  
7.438  
7.121  
7.118  
7.100

2.558  
2.548

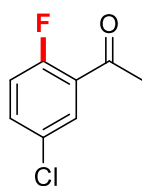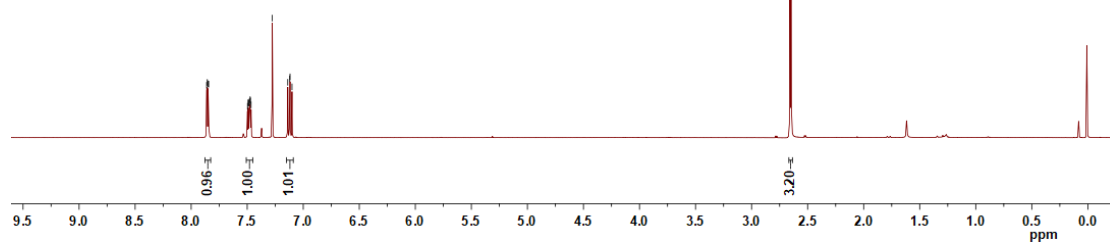

180131.18019302.fid  
WQZ20180131-JCI CDCl3 0131

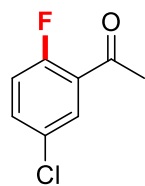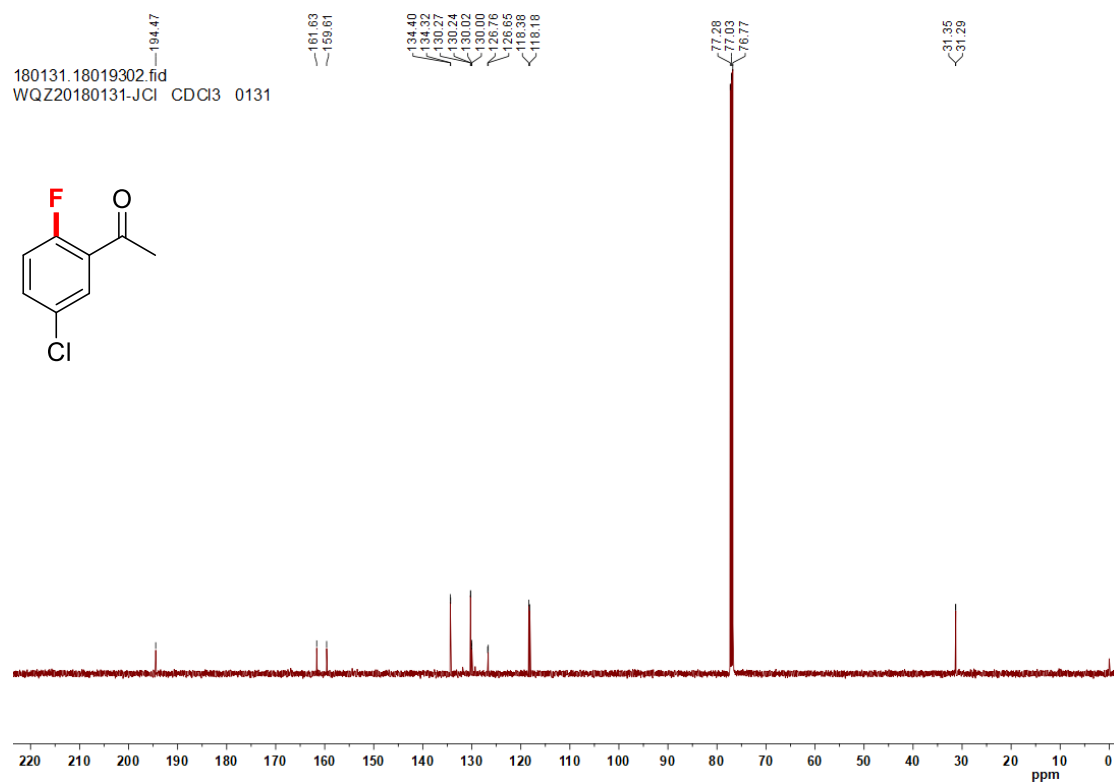



Oct18-2018.110.fid

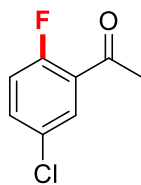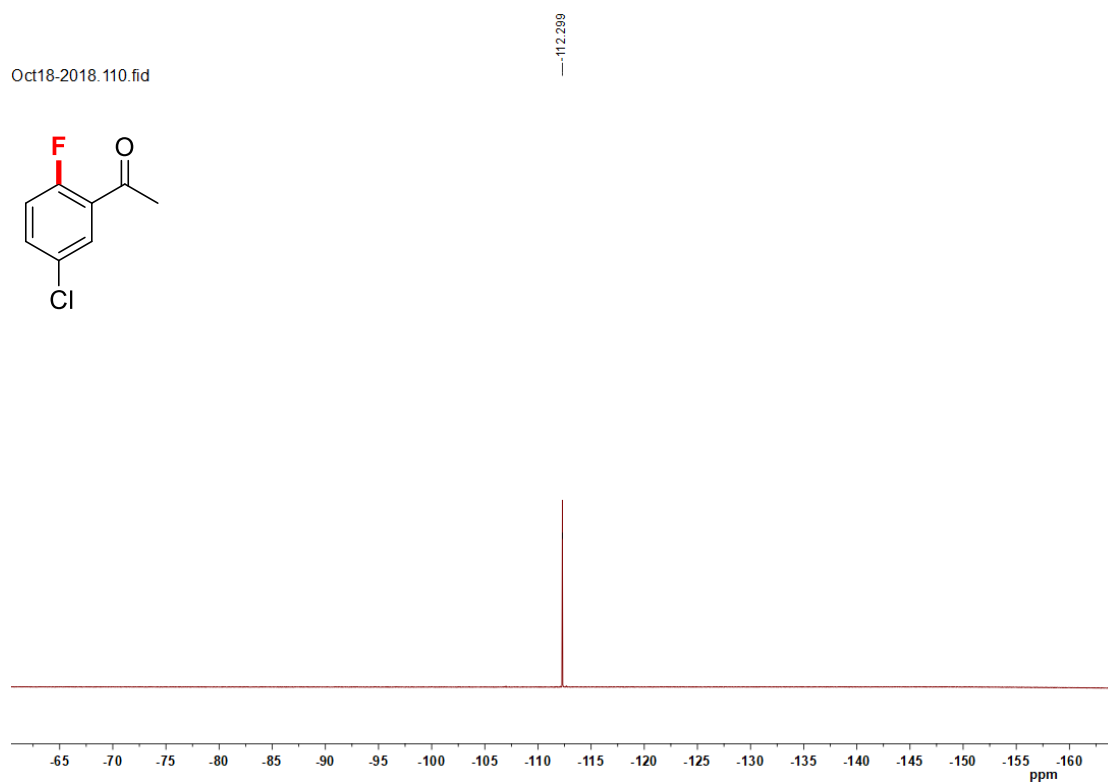

180111.18006451.fid  
WQZ20180110-JBr CDCl<sub>3</sub> 0111

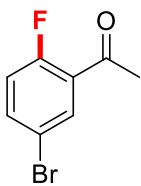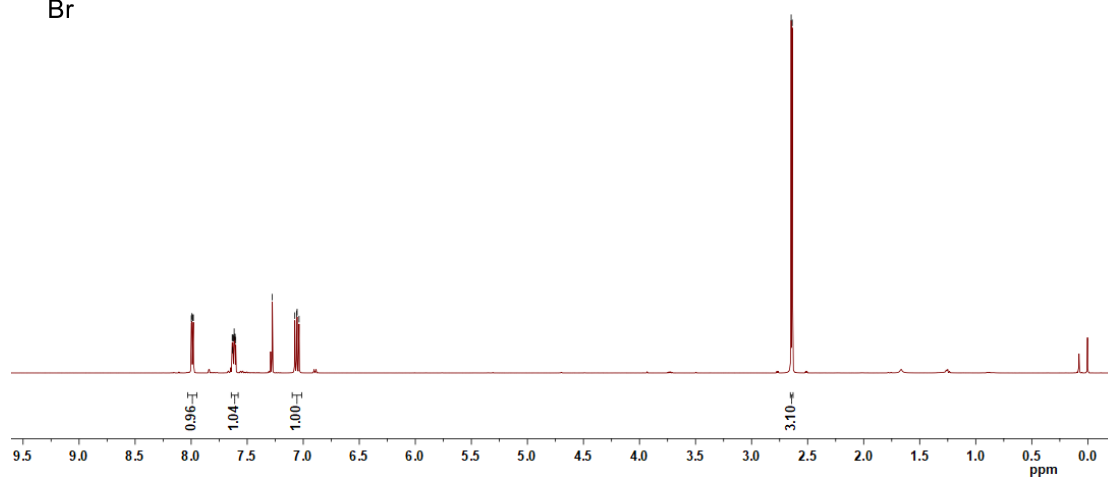

180111.18006452.fid  
WQZ20180110-JBr CDCl3 0111

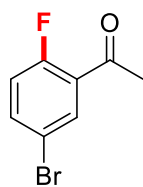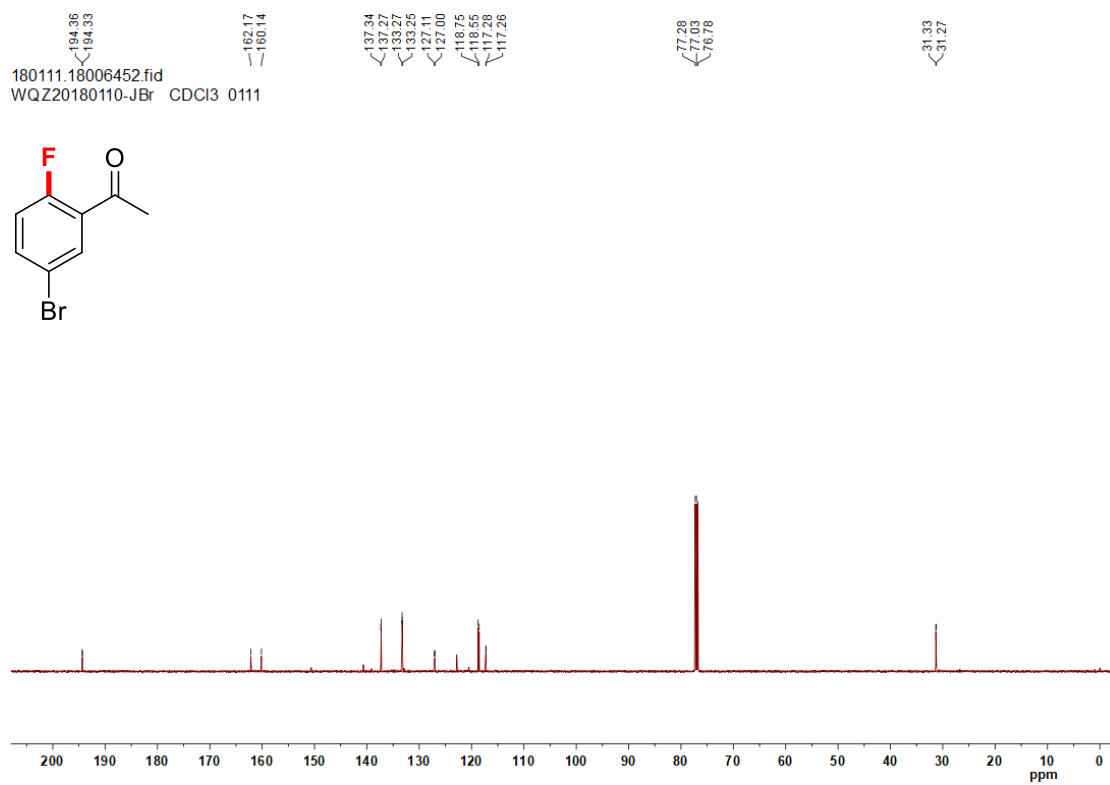

Oct18-2018.100.fid

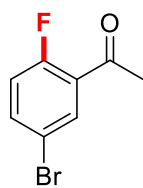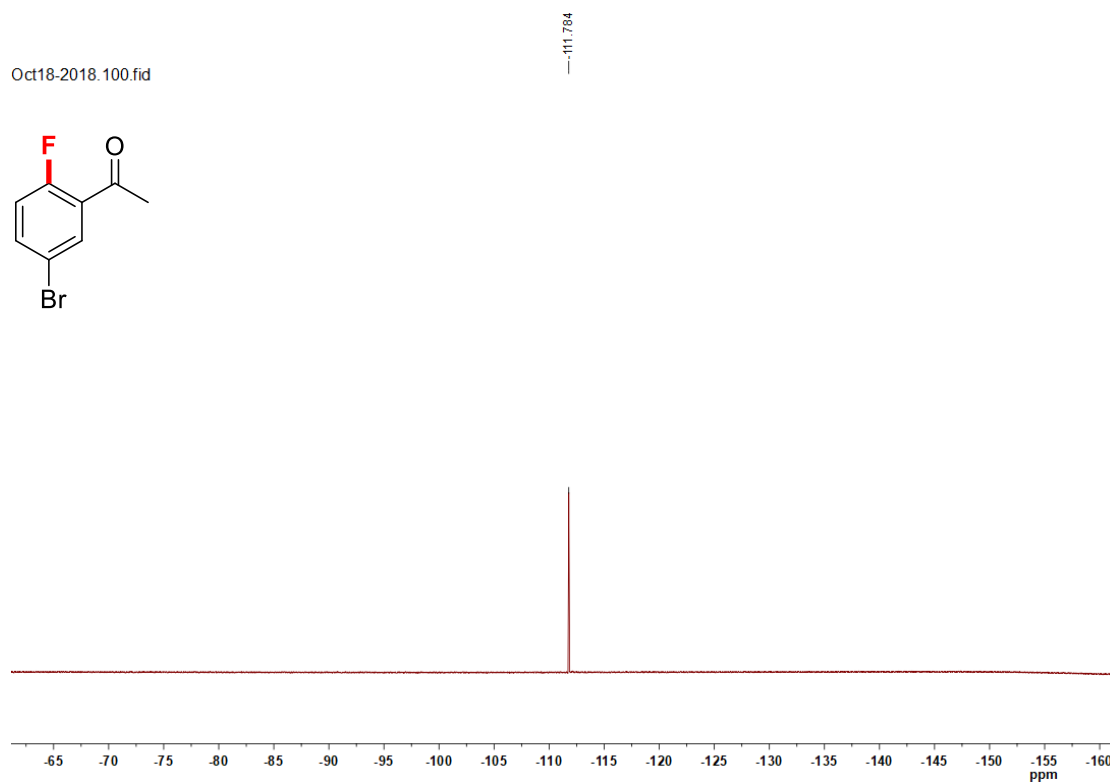

170710.170100151.fid  
WQZ20170710-3A CDCl<sub>3</sub> 0710

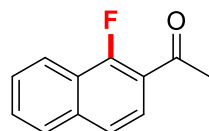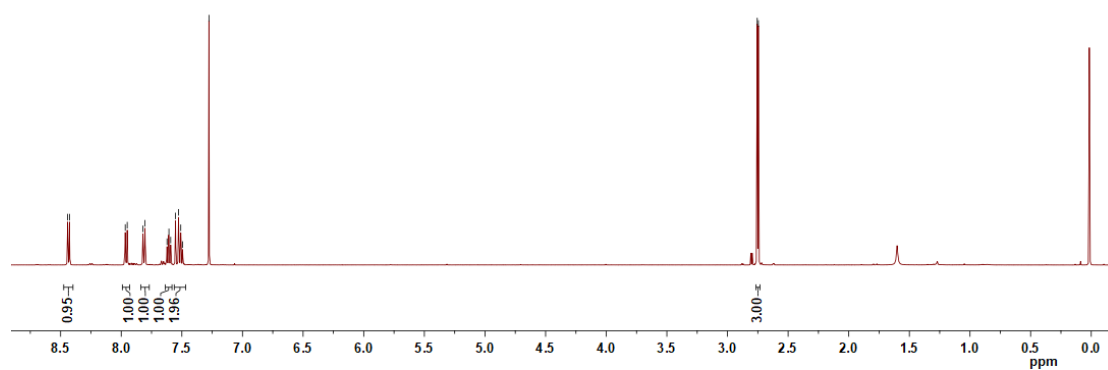

170918.17125551.fid  
WQZ20170918-3A1 CDCl<sub>3</sub> 0918

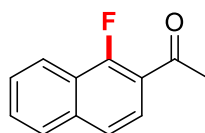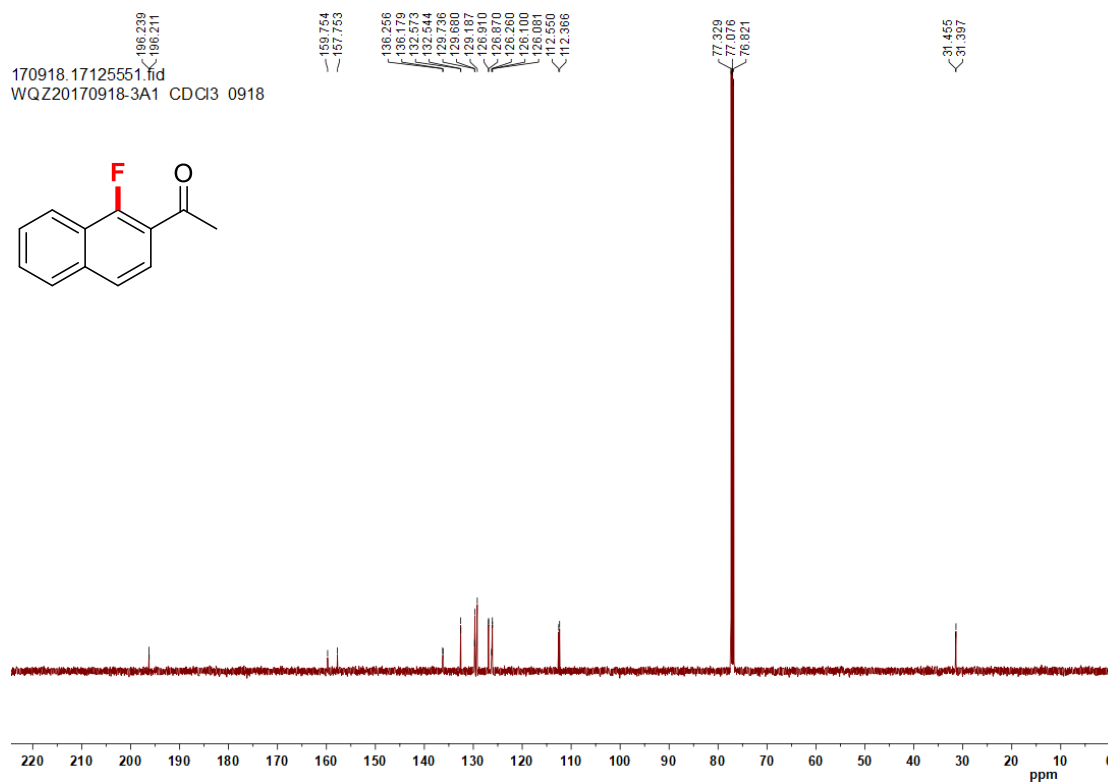

Oct18-2018.160.fid

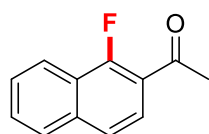

114.958

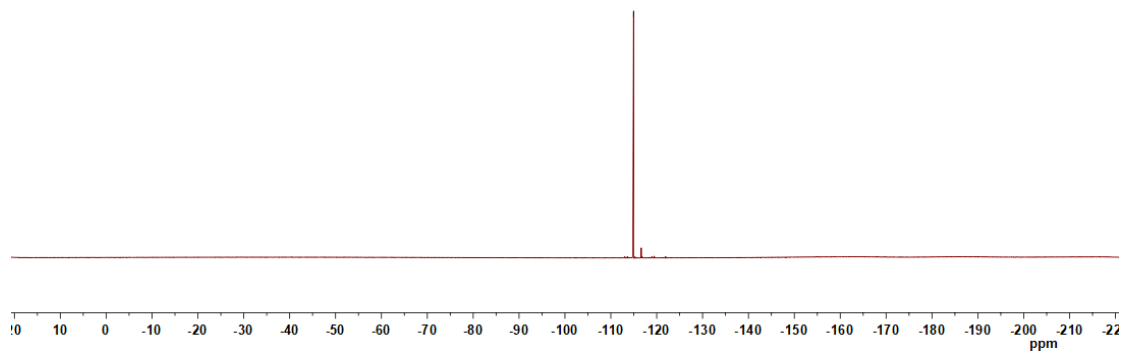

190924.19139032.fid  
WQZ20190924006 CDCl<sub>3</sub> 0924

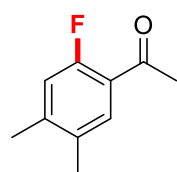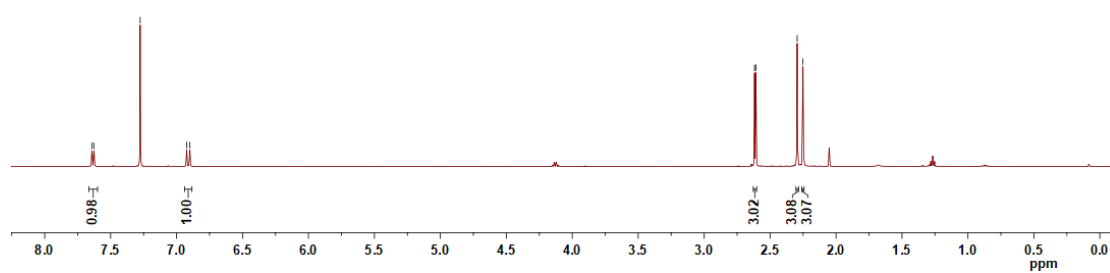

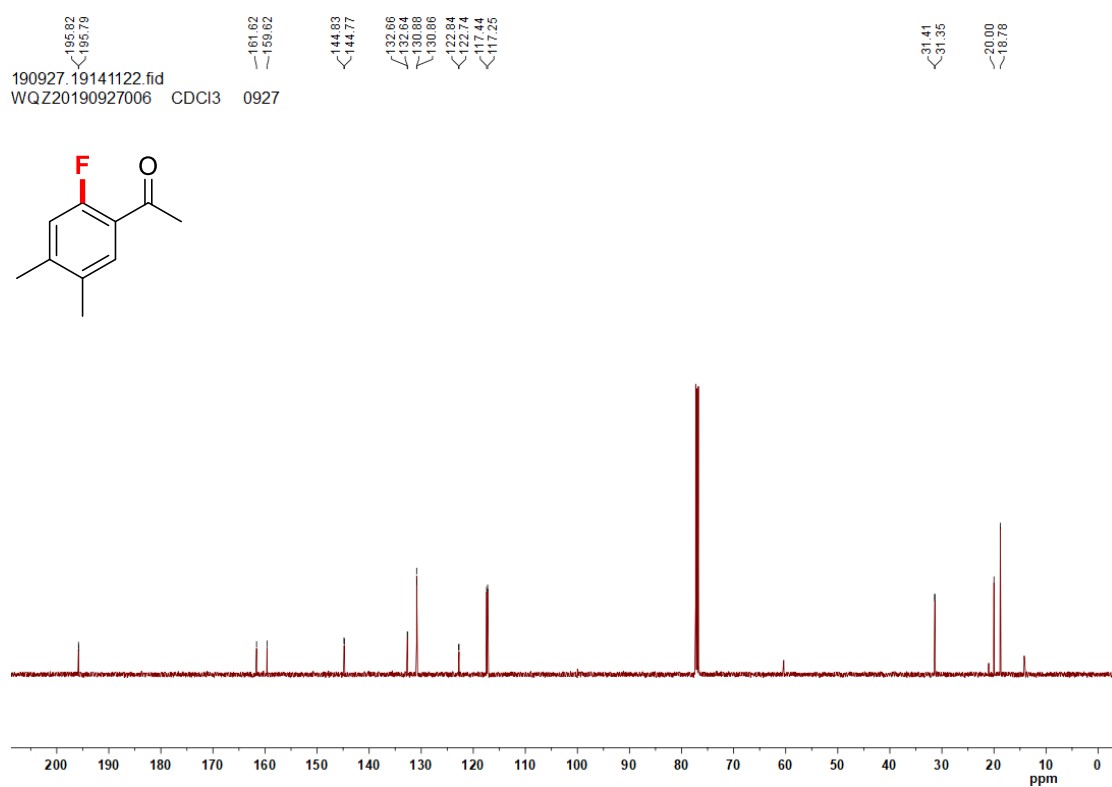

KN-20191015-1910085577-F.10.1.1r

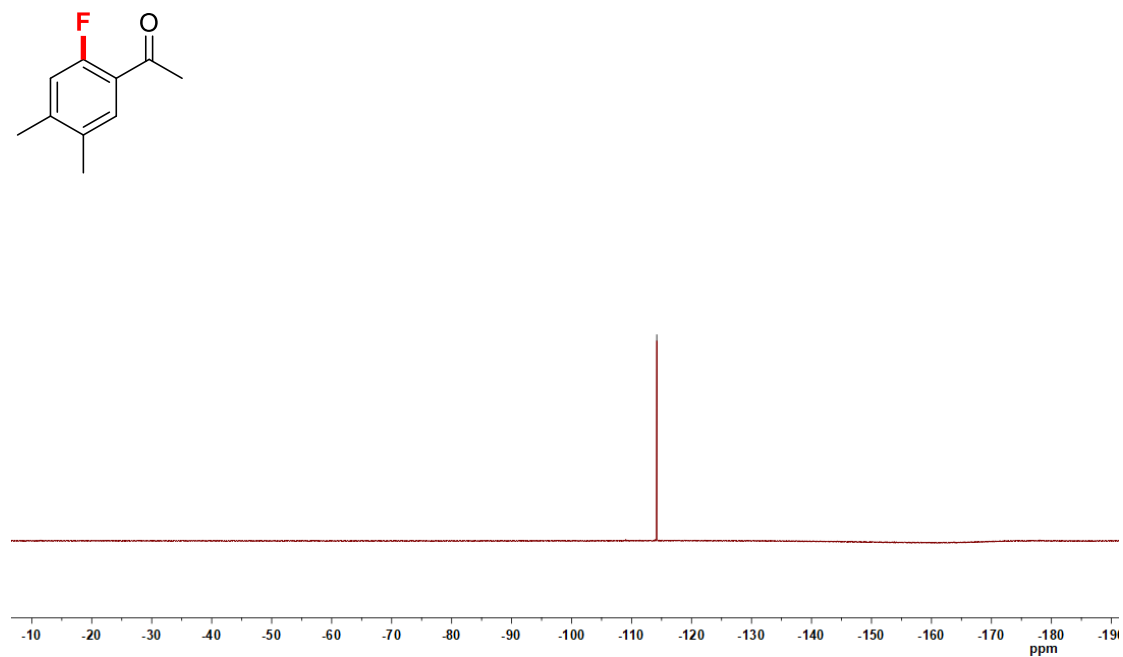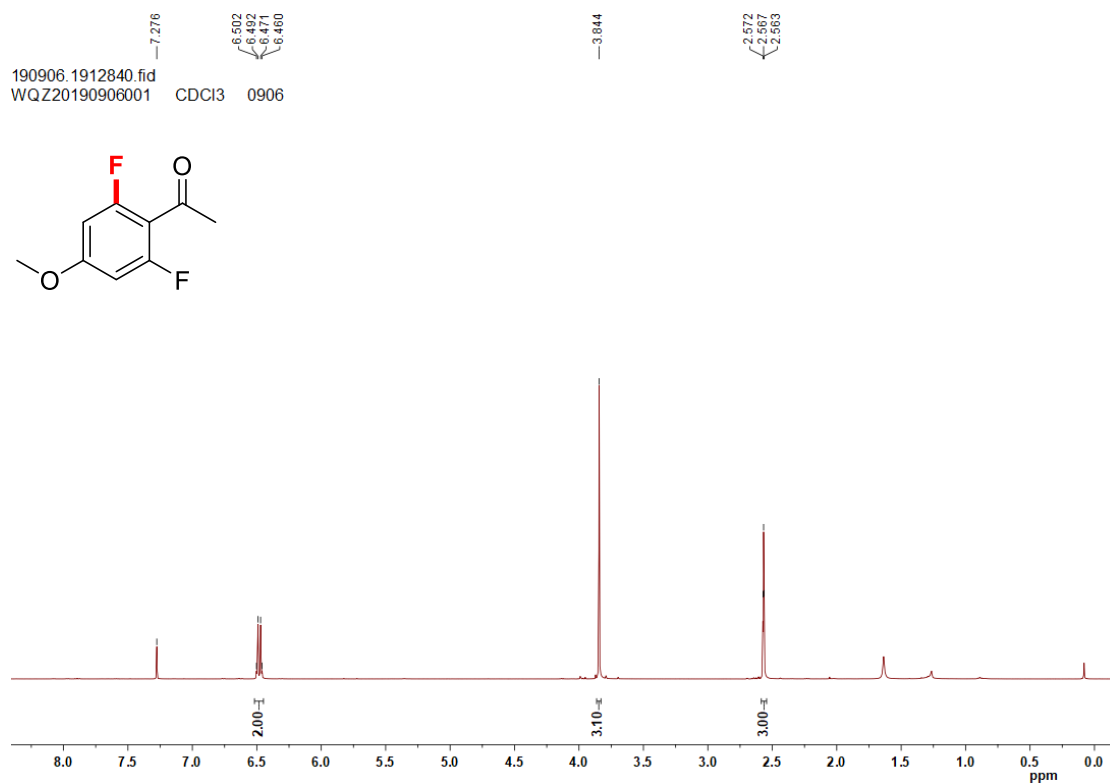

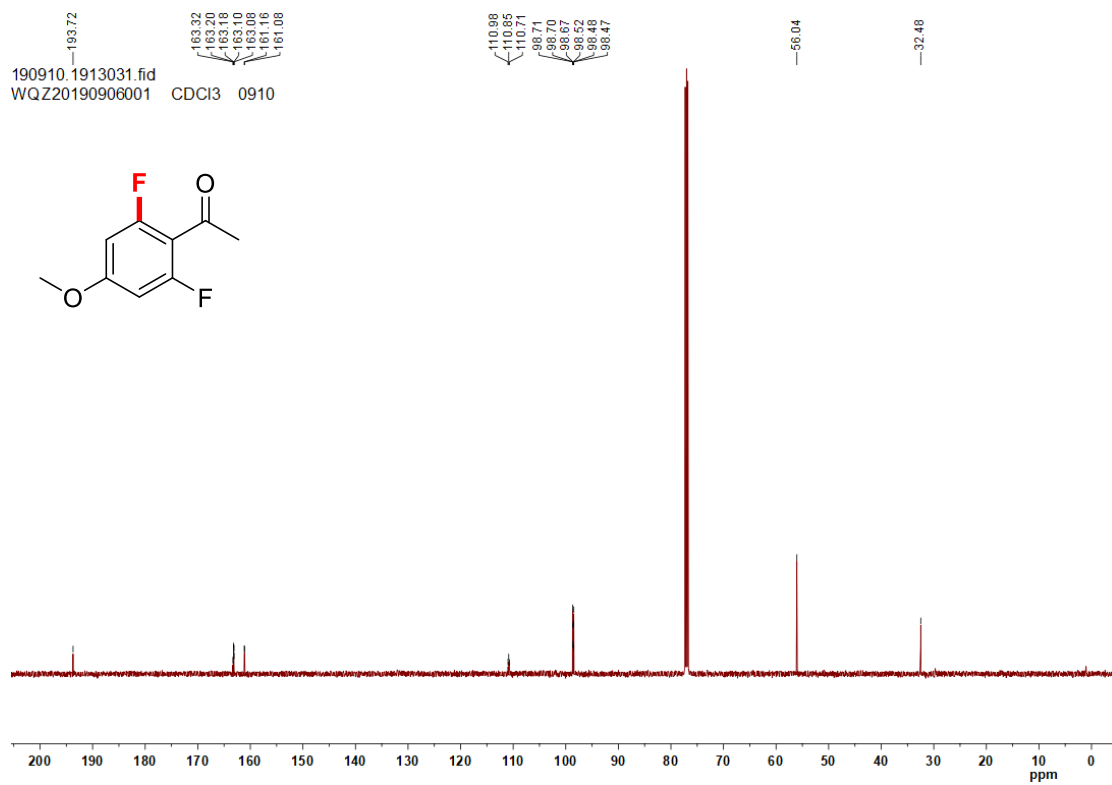

KN-20191015-1910085577-C.10.1.1r

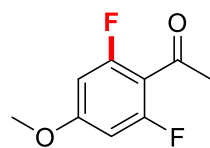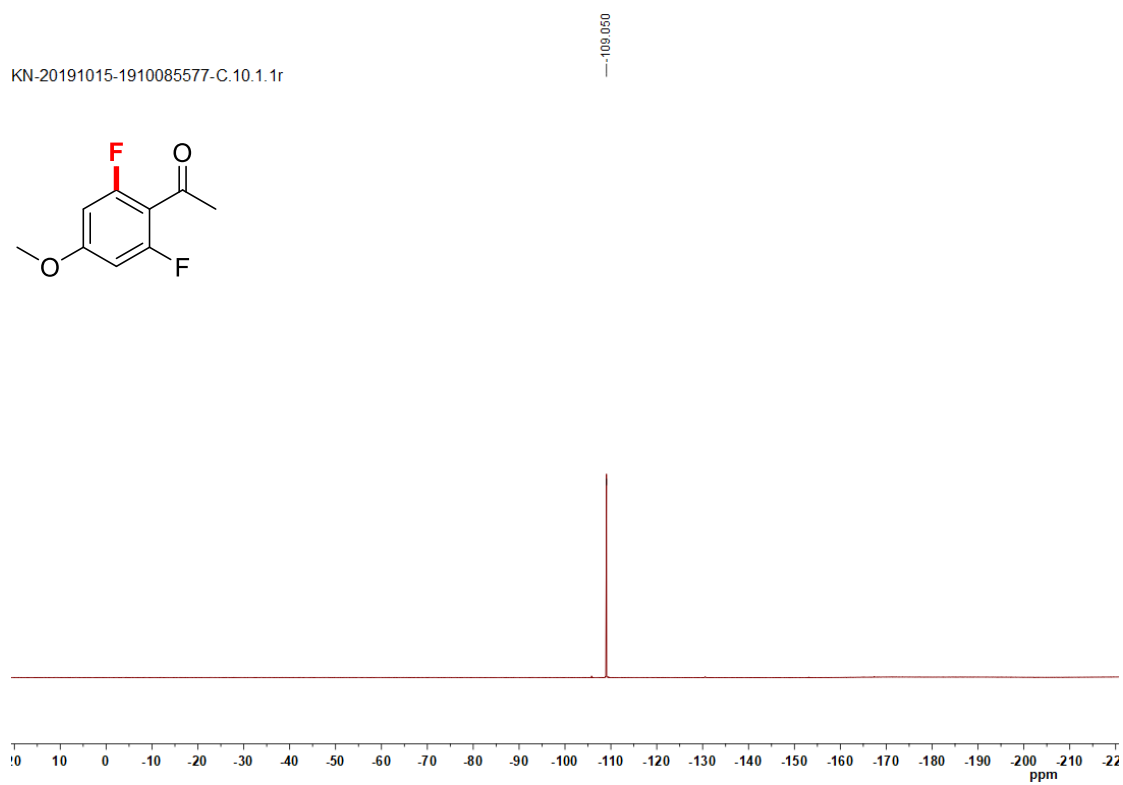

190924.19139031.fid  
WQZ20190924005 CDCl<sub>3</sub> 0924

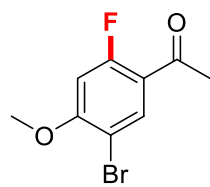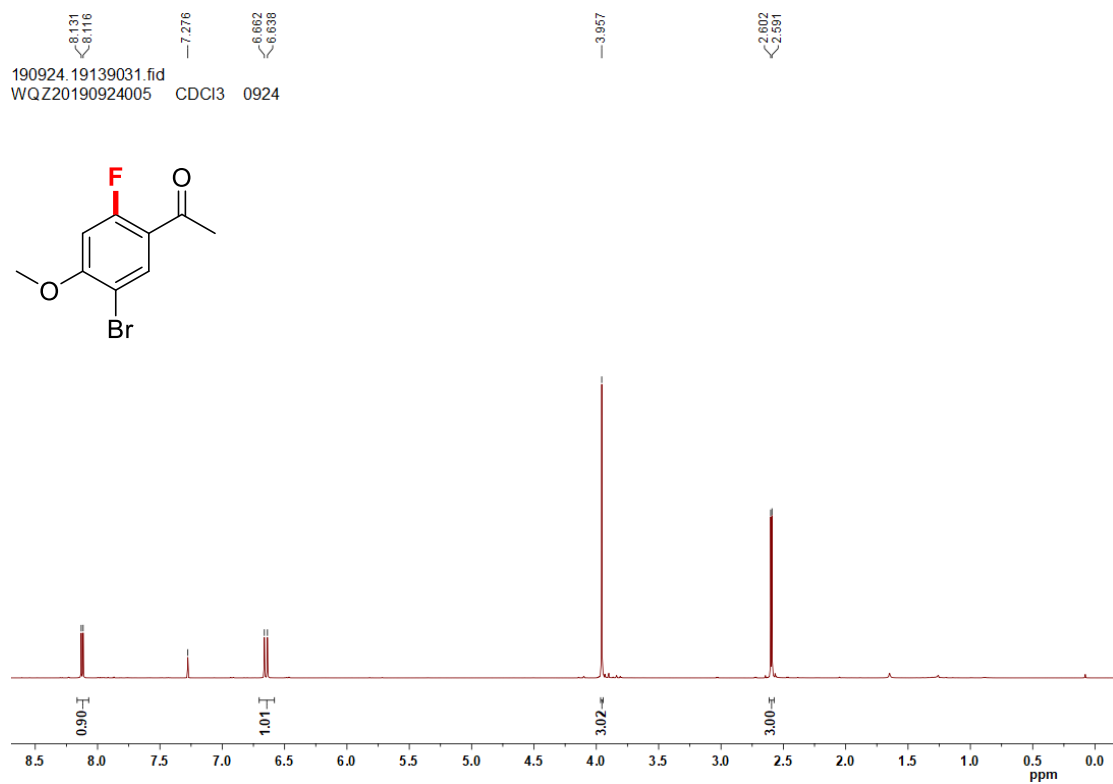



190927.19141121.fid  
WQZ20190927005 CDCl3 0927

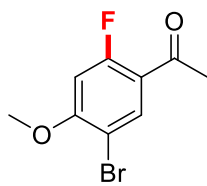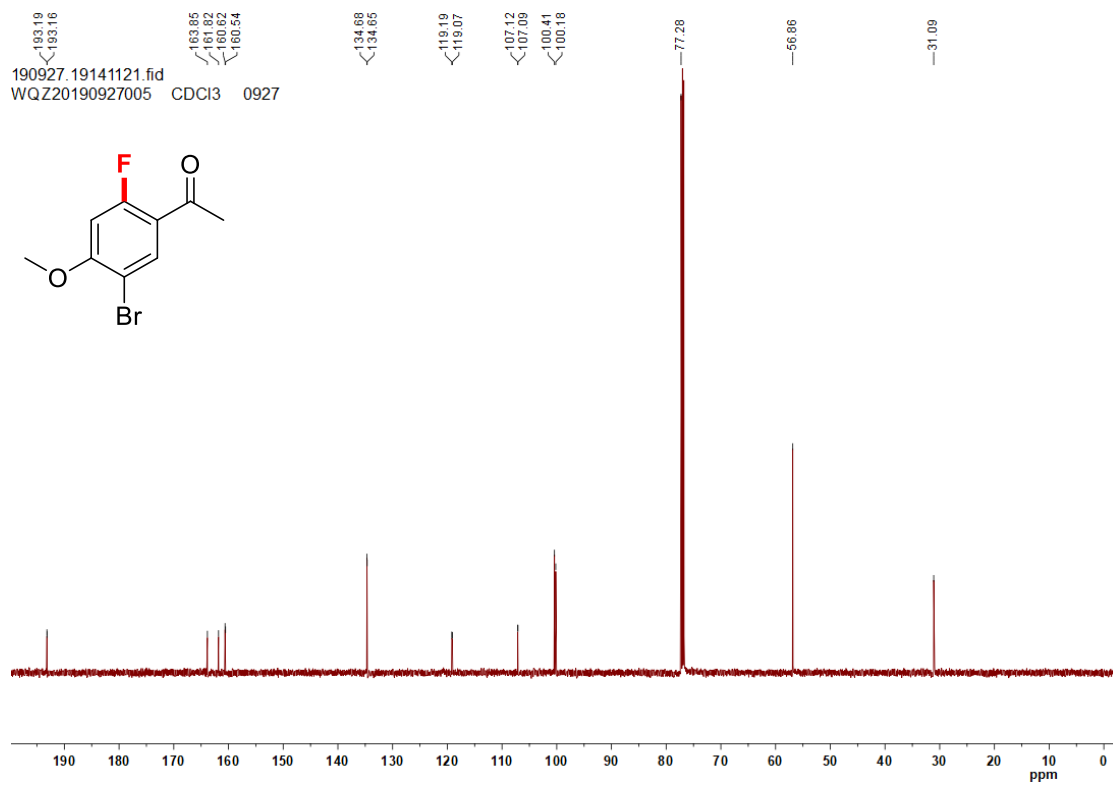

KN-20191015-1910085577-E.10.1.1r

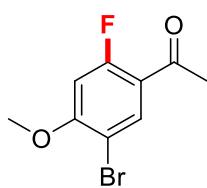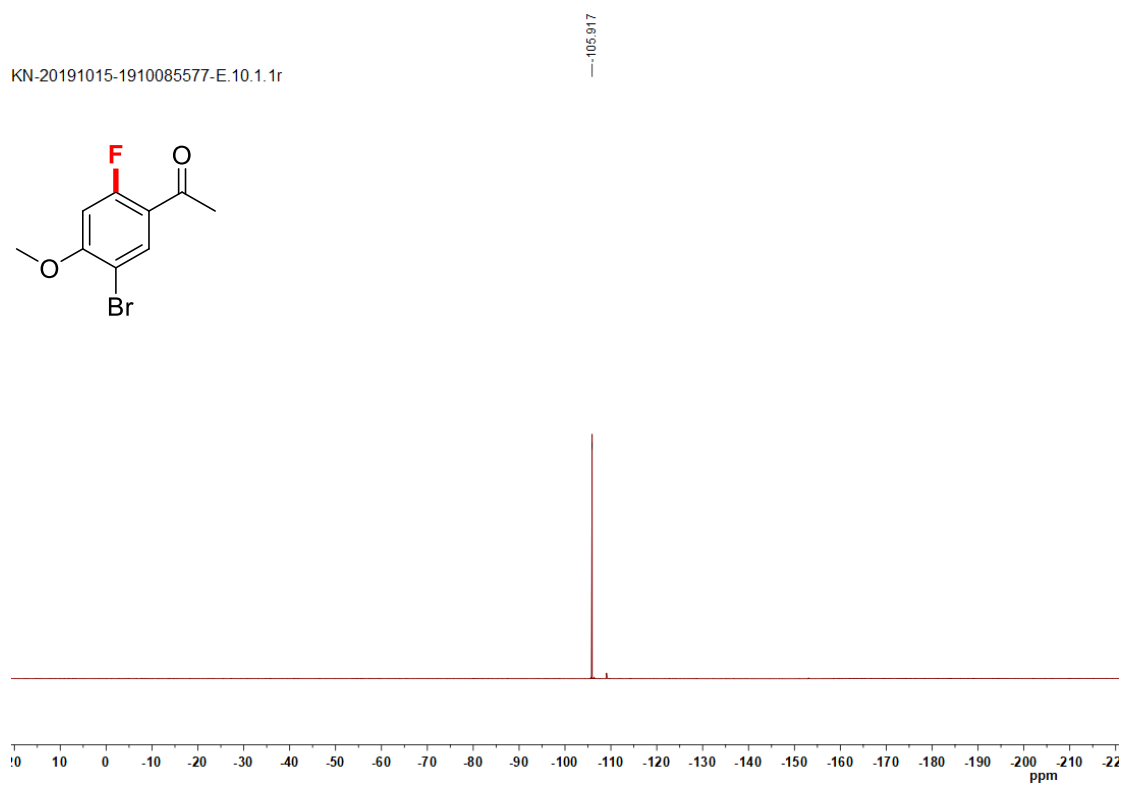

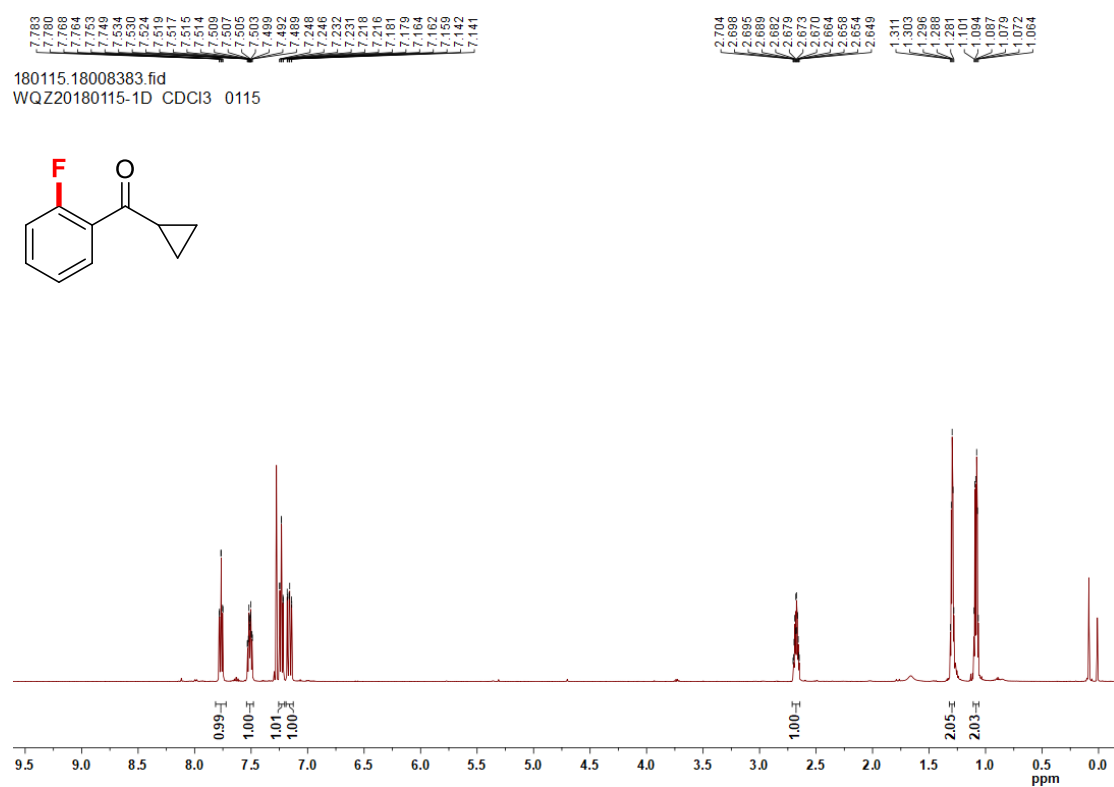

180122.18013283.fid  
WQZ20180122-1D CDCl3 0122

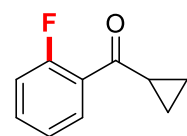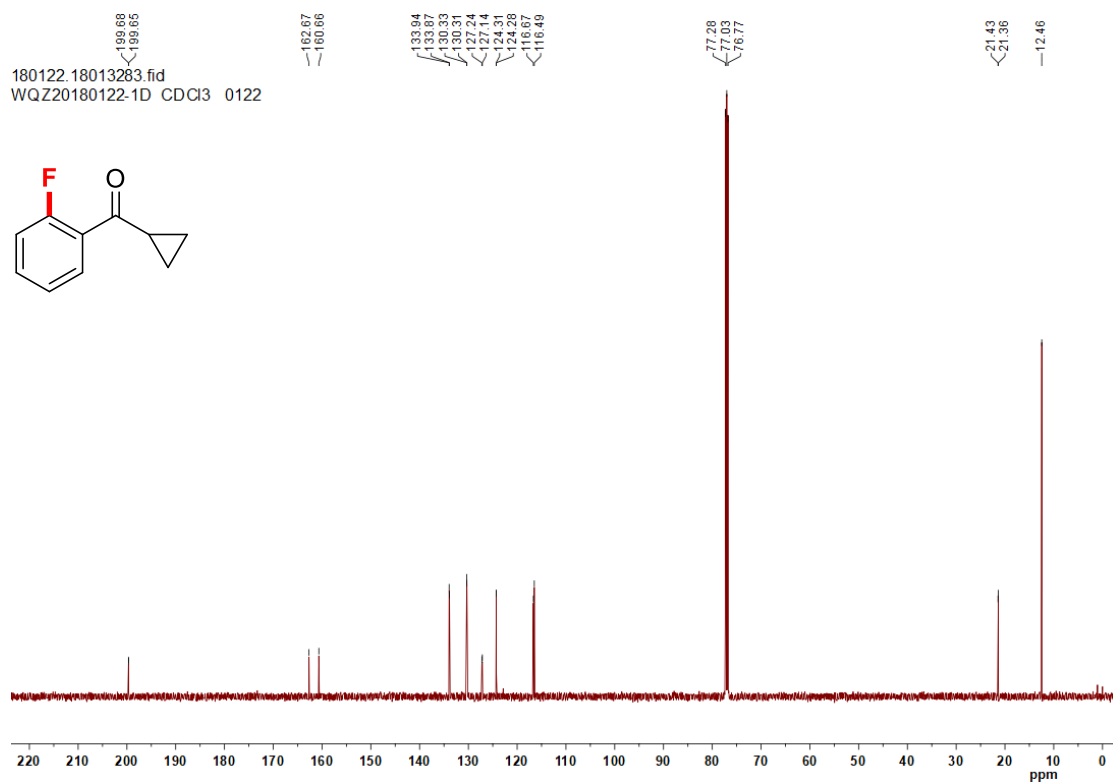

Oct18-2018.80.fid

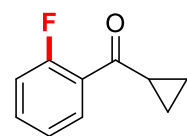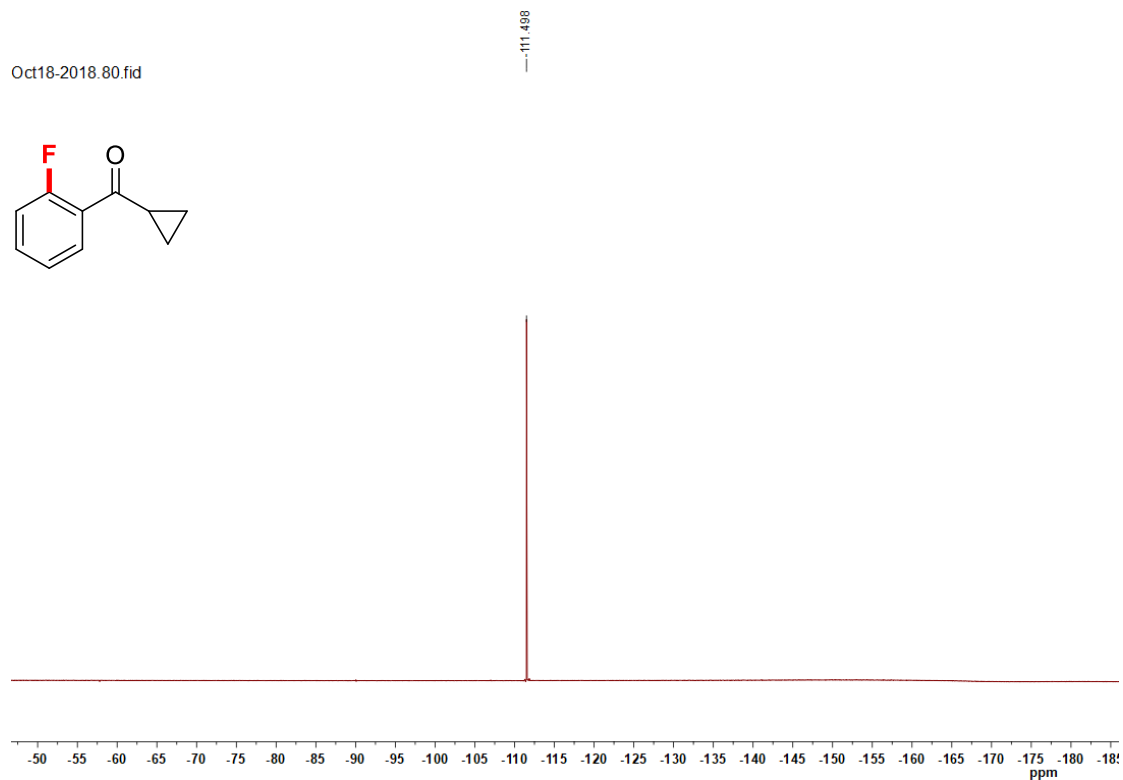

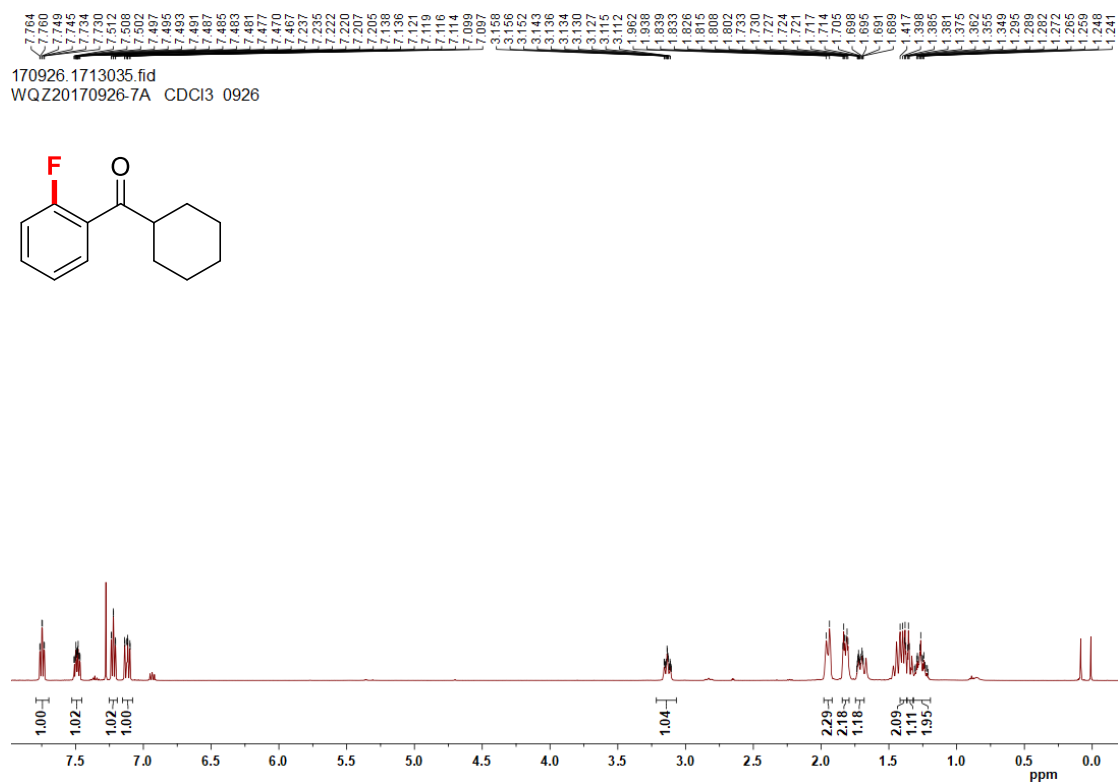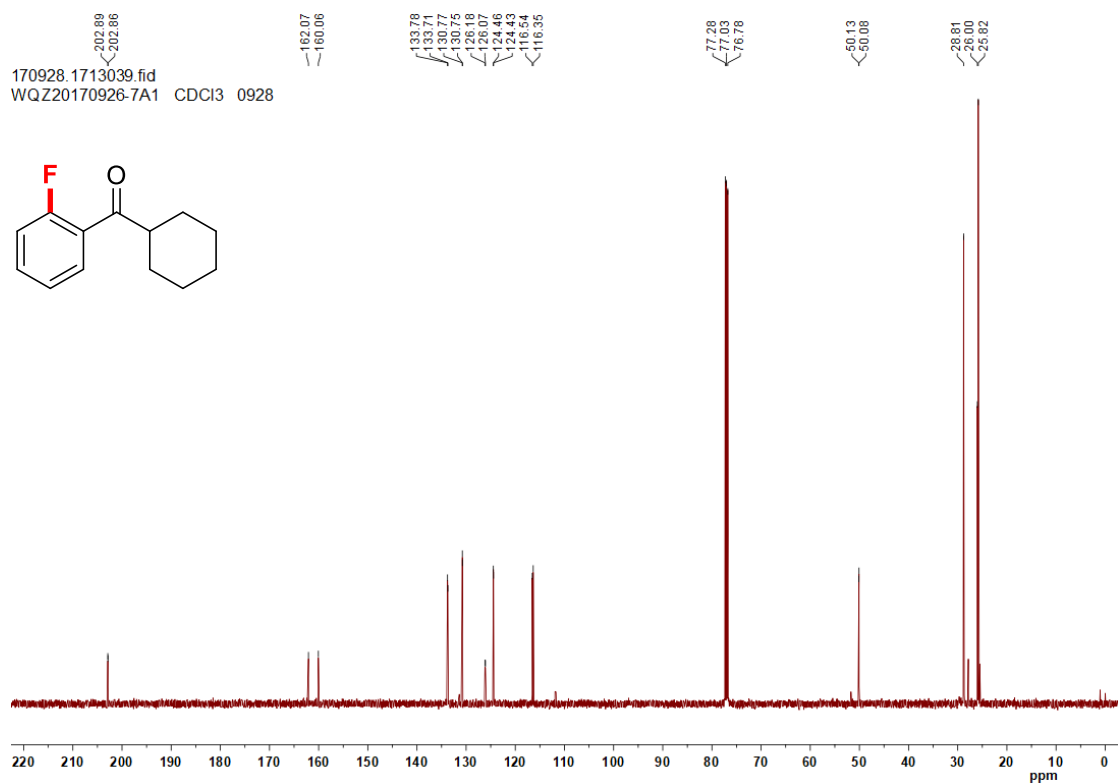

Oct18-2018.130.fid

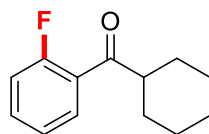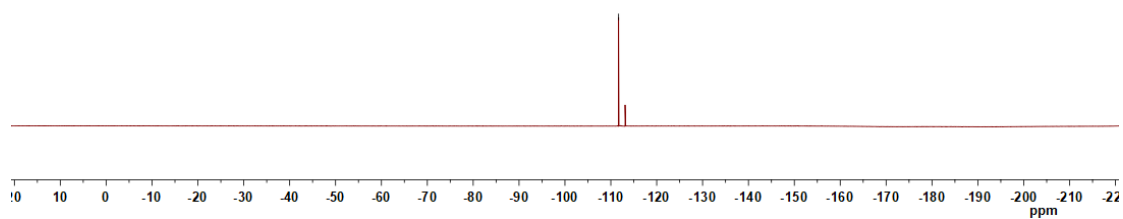

190924.19139012.fid  
WQZ20190924003 CDCl3 0924

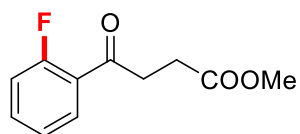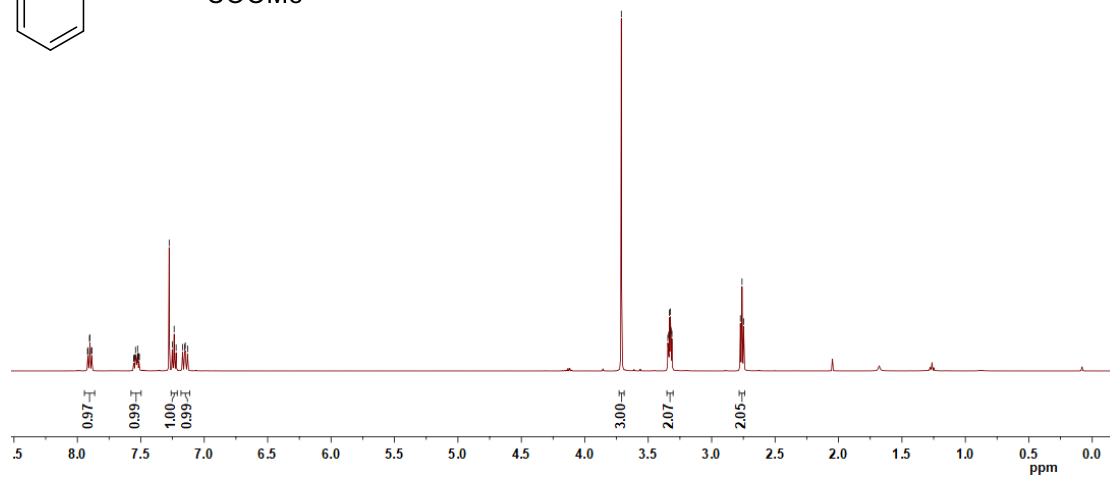

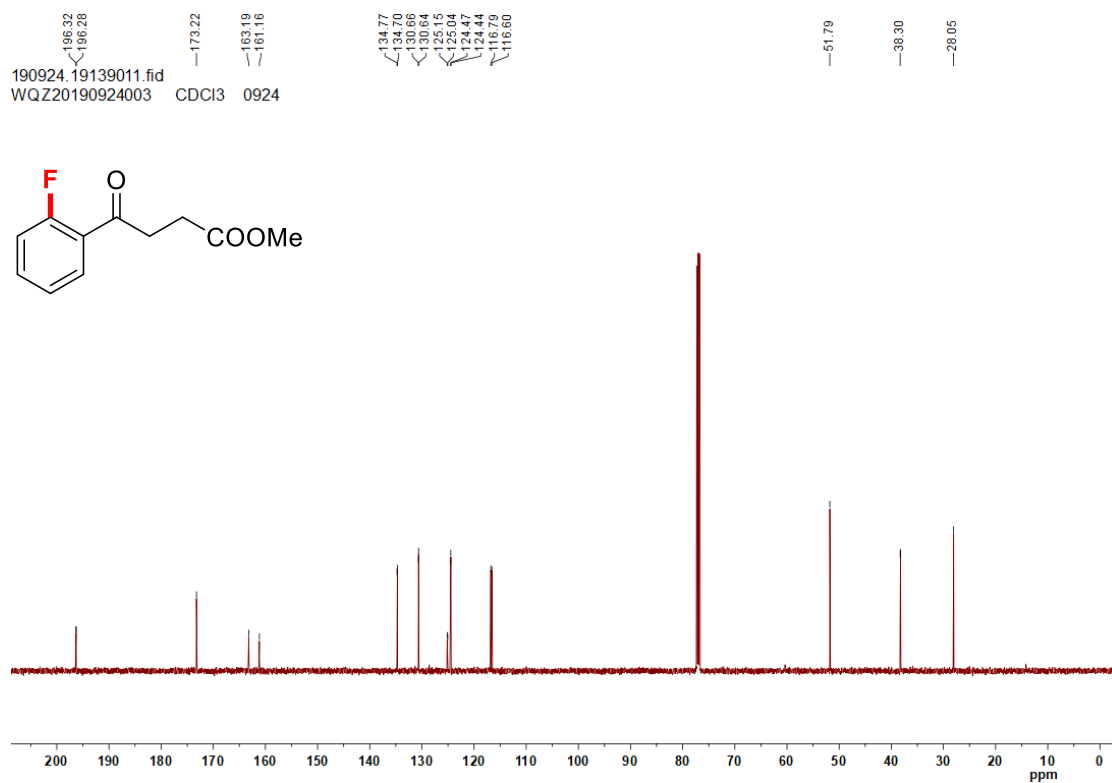

KN-20191015-1910085577-D.10.1.1r

—108.902

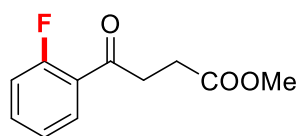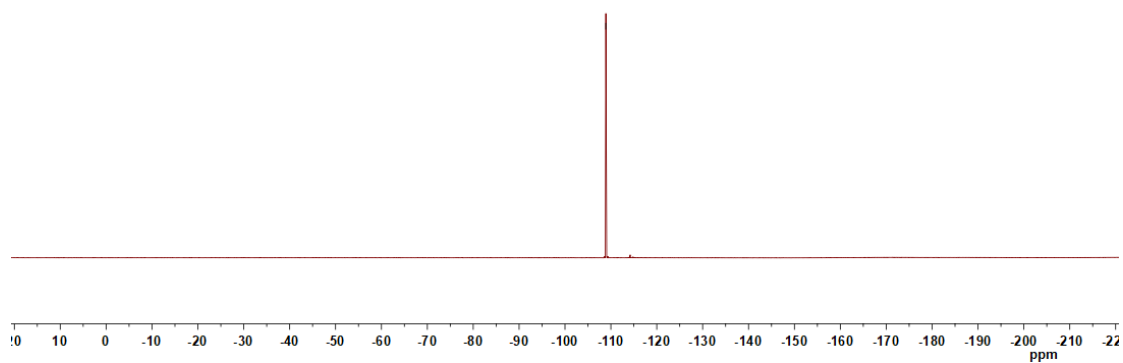

200817.20066001.fid  
WQZ20200817001 CDCl3 0817

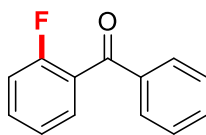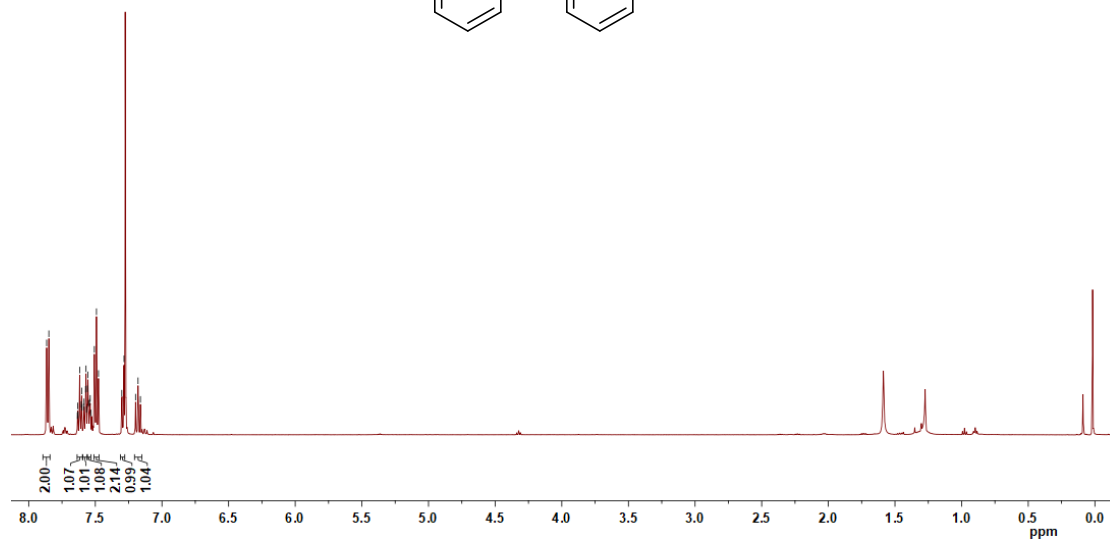

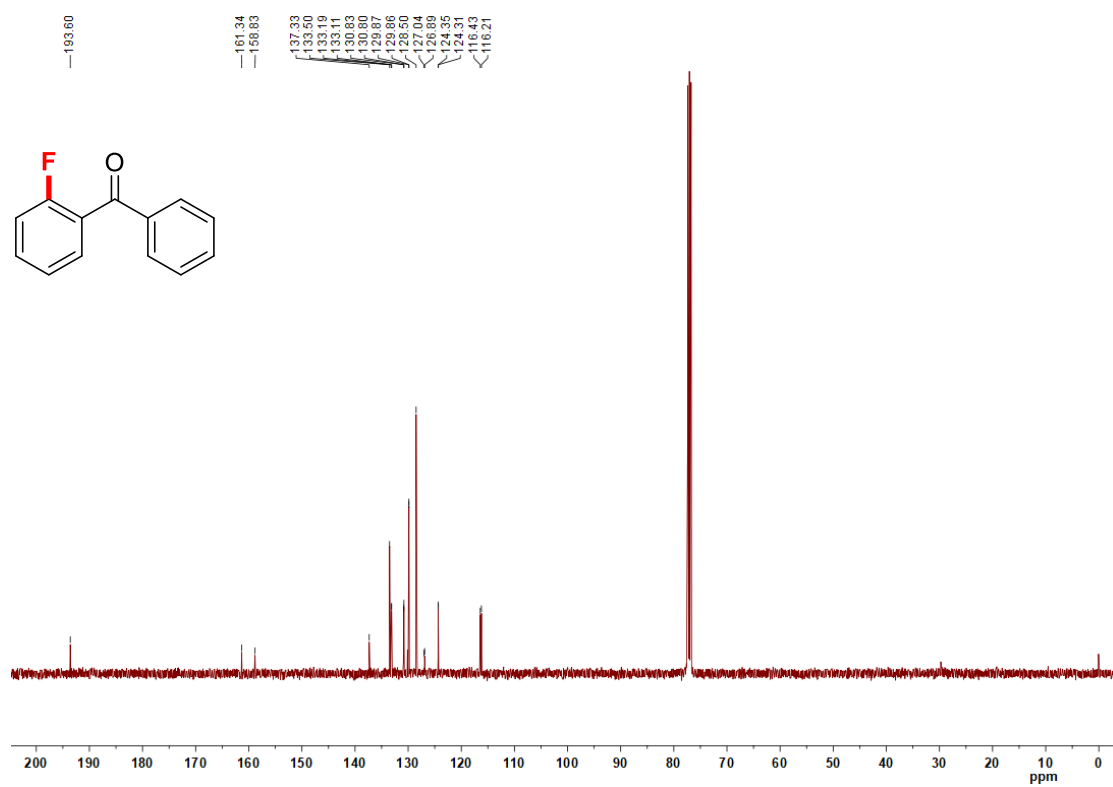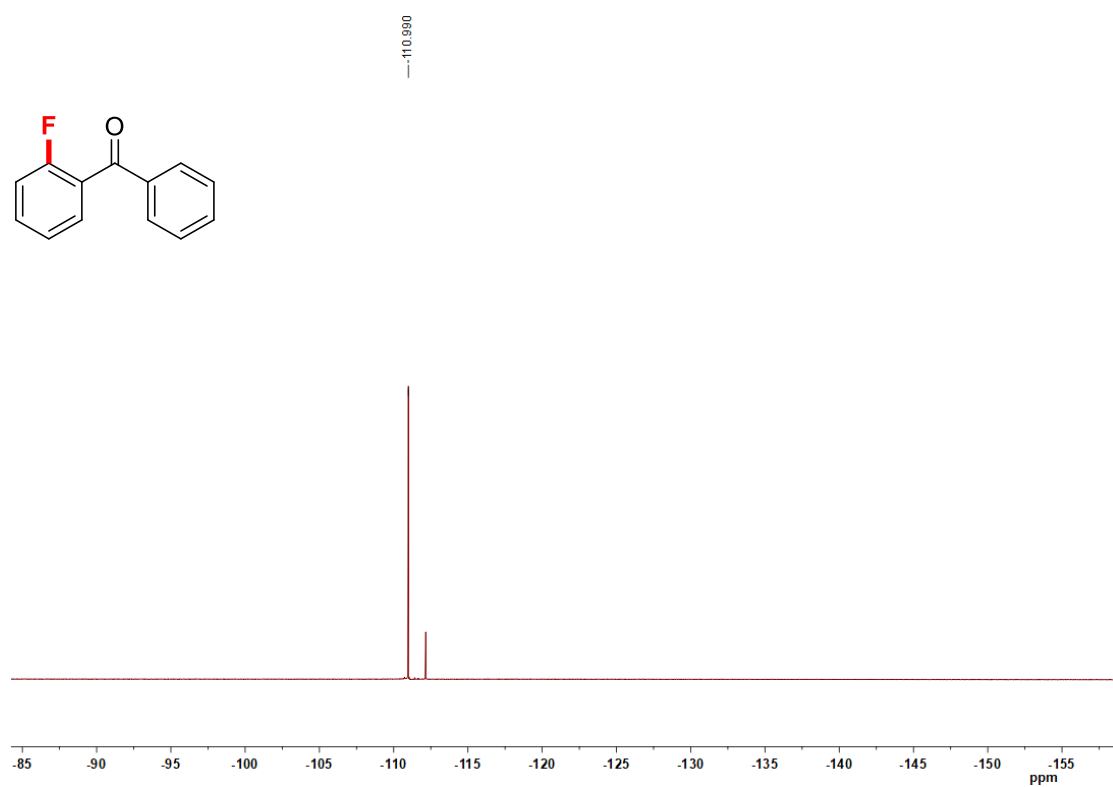



8.347  
8.330  
7.995  
7.976  
7.972  
7.660  
7.658  
7.651  
7.647  
7.643  
7.636  
7.635  
7.633  
7.624  
7.620  
7.616  
7.609  
7.592  
7.589  
7.345  
7.330  
7.276  
7.227  
7.190

190902.1912582.fid  
WQZ20190902002 CDCl<sub>3</sub> 0902

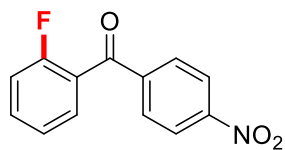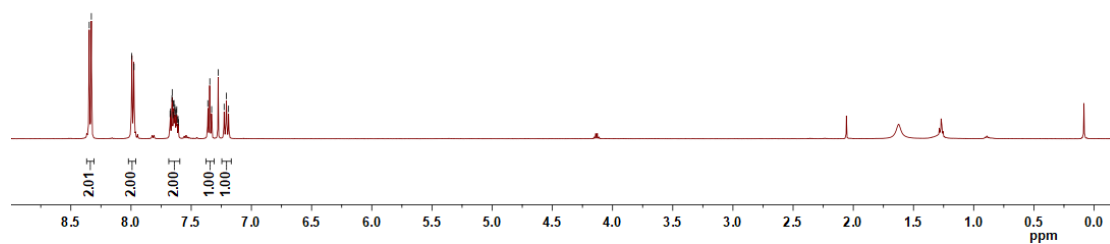

191.76  
161.37  
159.35  
150.36  
142.46  
134.46  
134.40  
131.09  
131.07  
130.42  
130.41  
125.76  
125.65  
124.80  
124.78  
123.69  
116.66  
116.48

190904.1912692.fid  
20190902002 CDCl<sub>3</sub> 0904

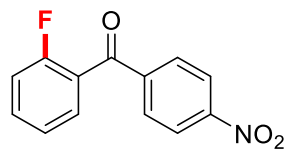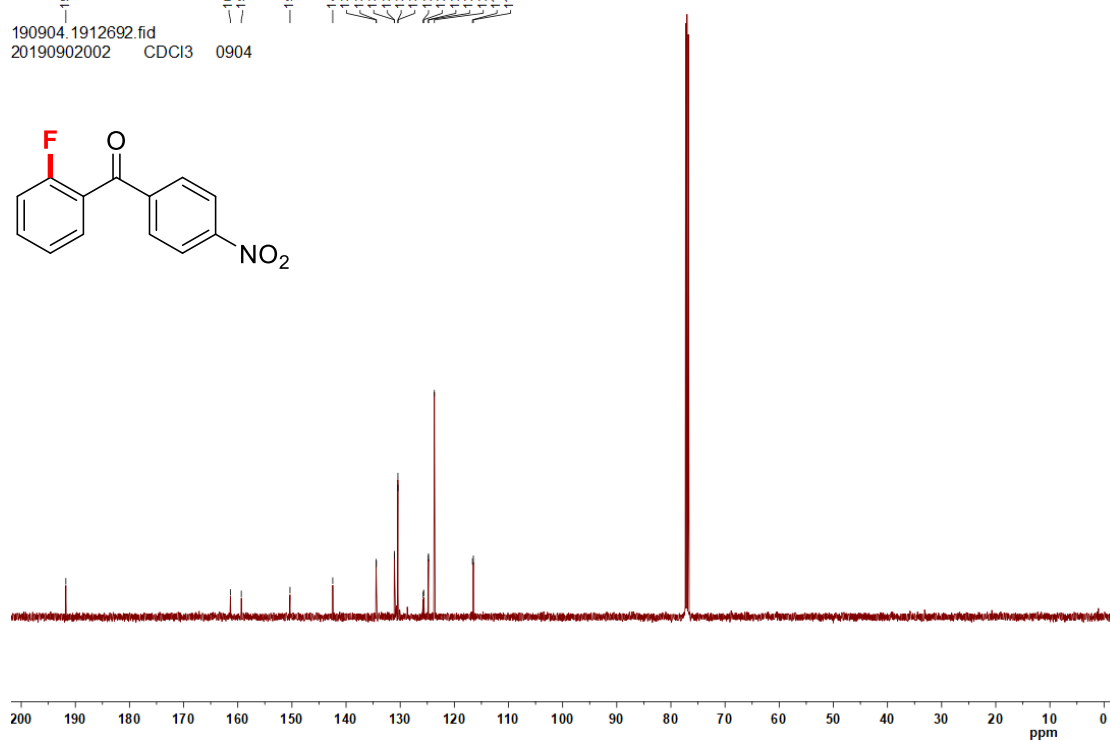

KN-20191015-1910085577-B.10.1.1r

—109.159

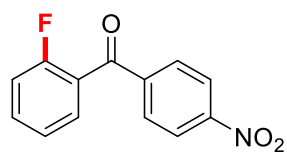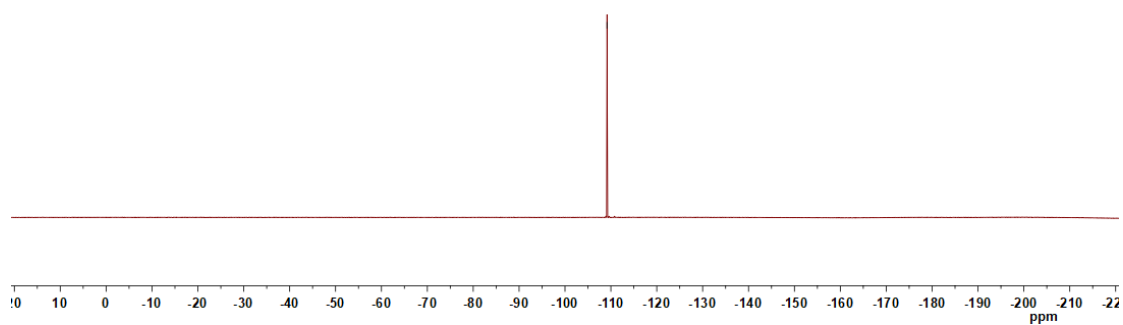

191209.1918569.fid  
WQZ20191209001 CDCl3 1209

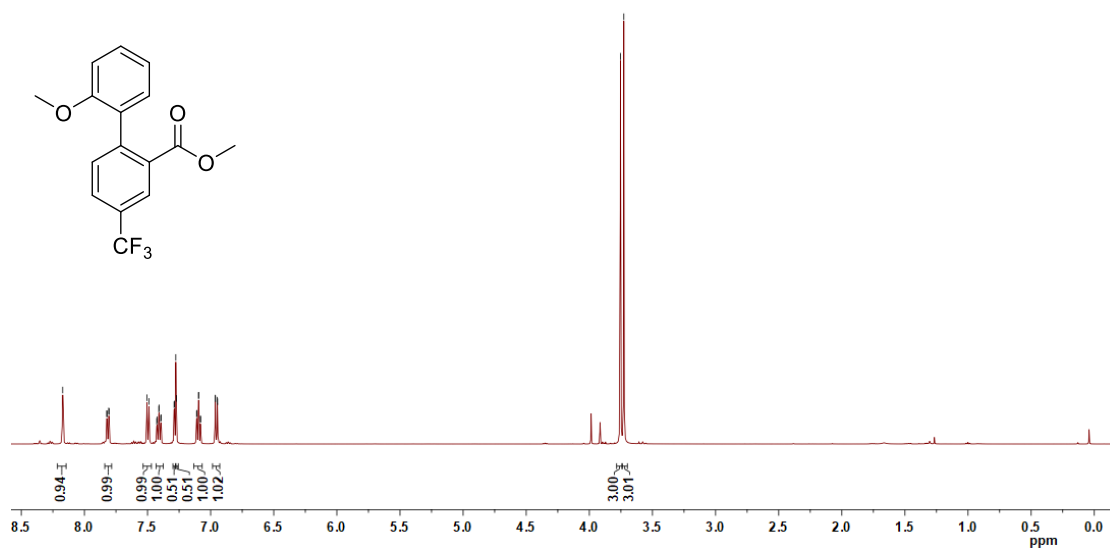

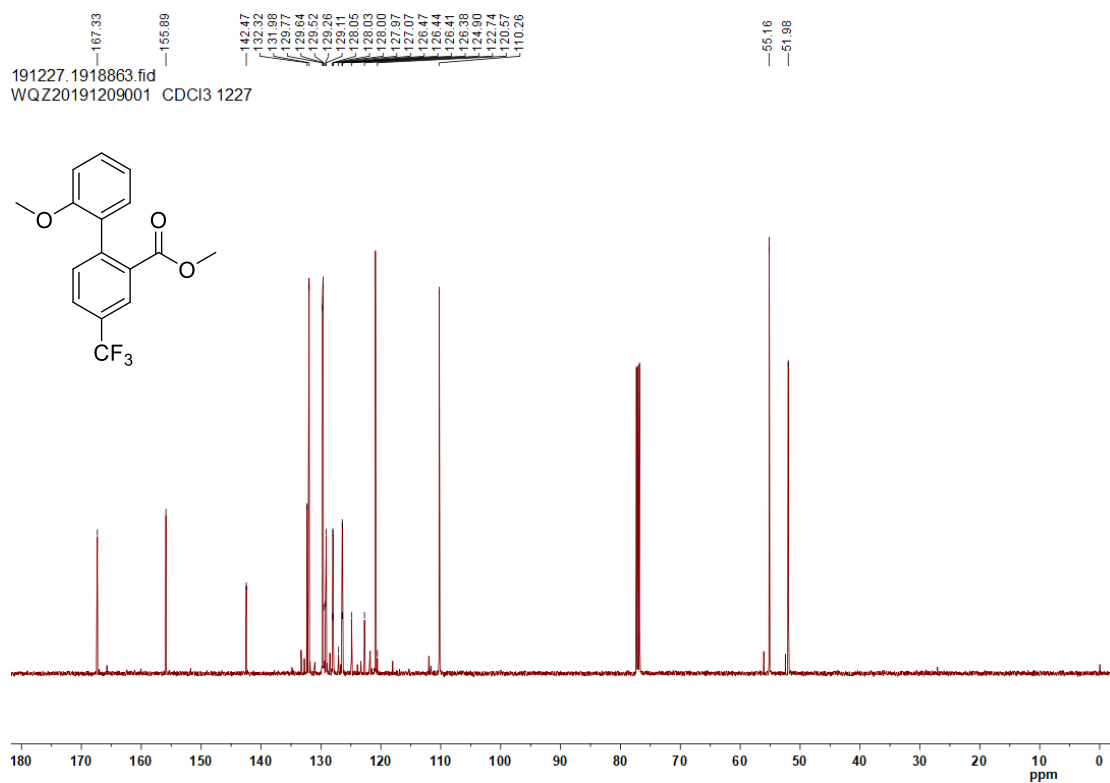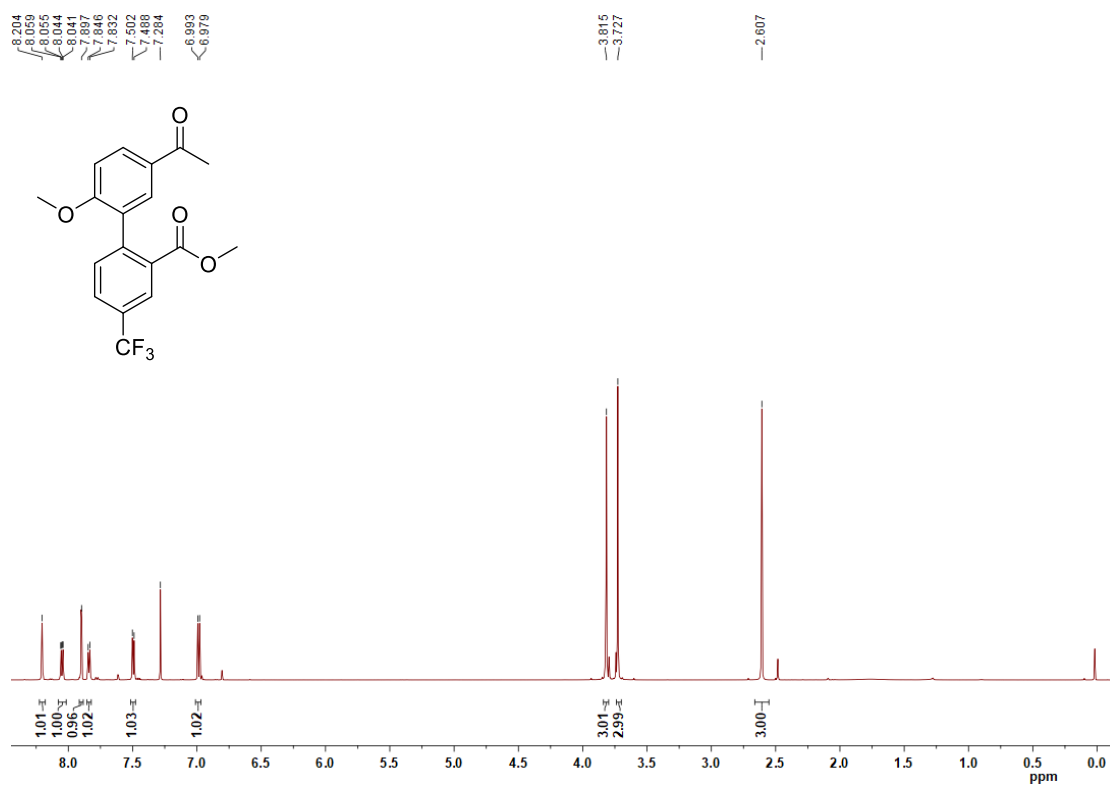

191209.1918473.fid  
WQZ20191208001 CDCl<sub>3</sub> 1209

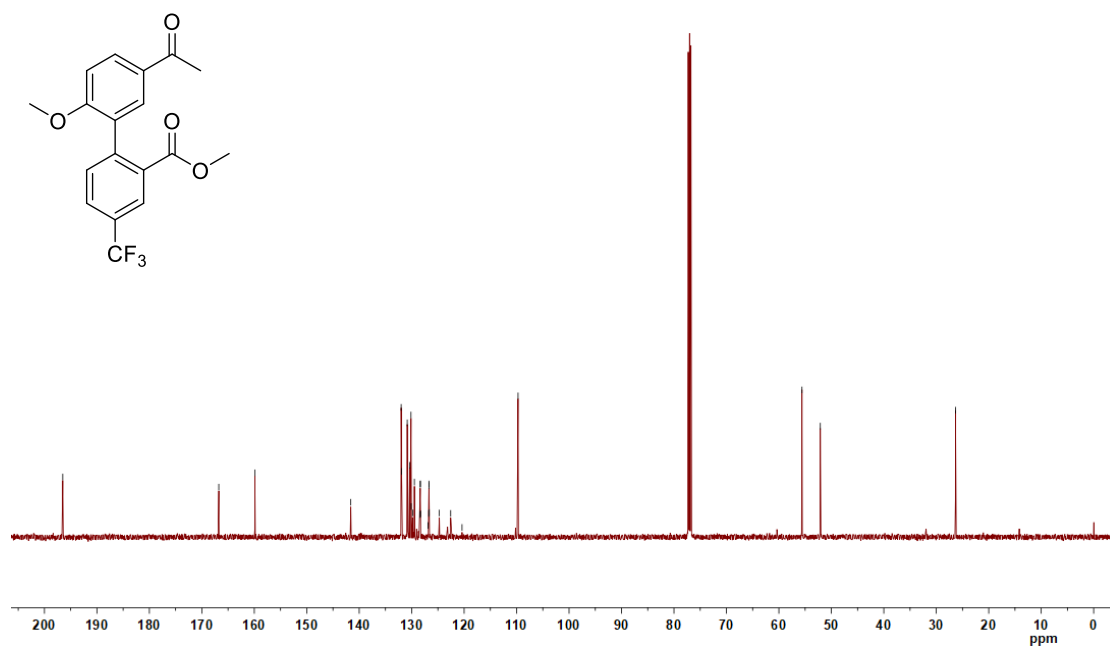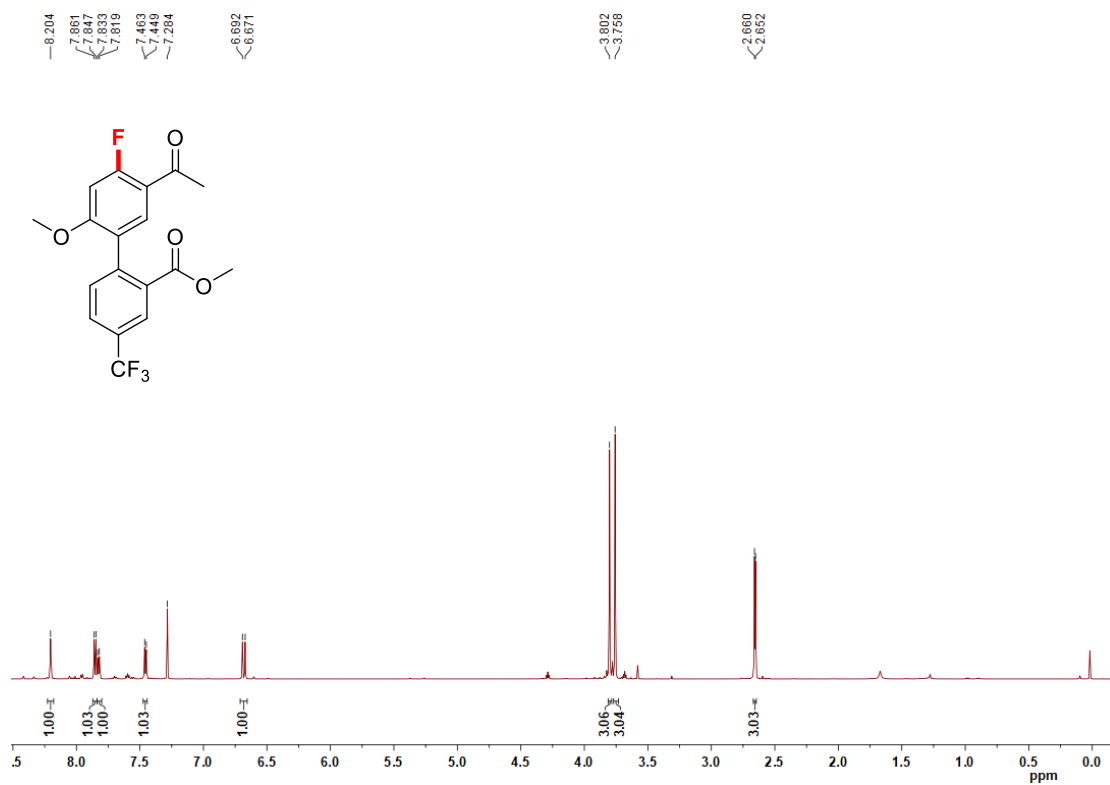

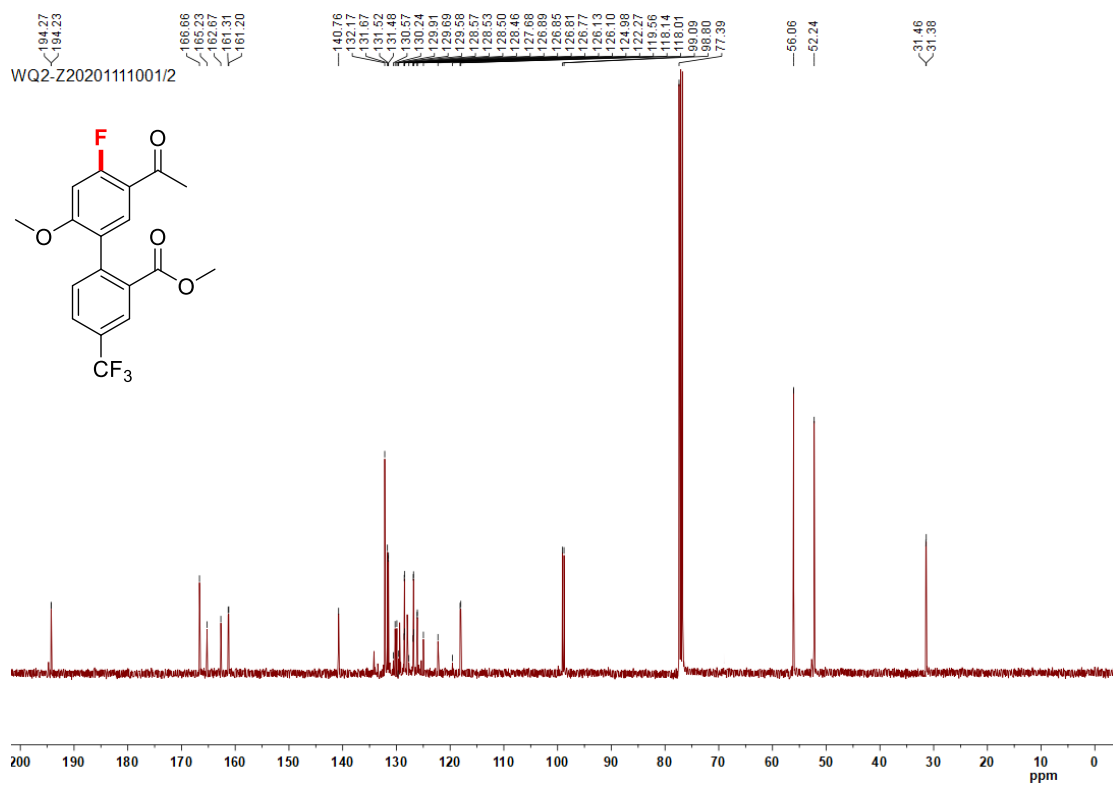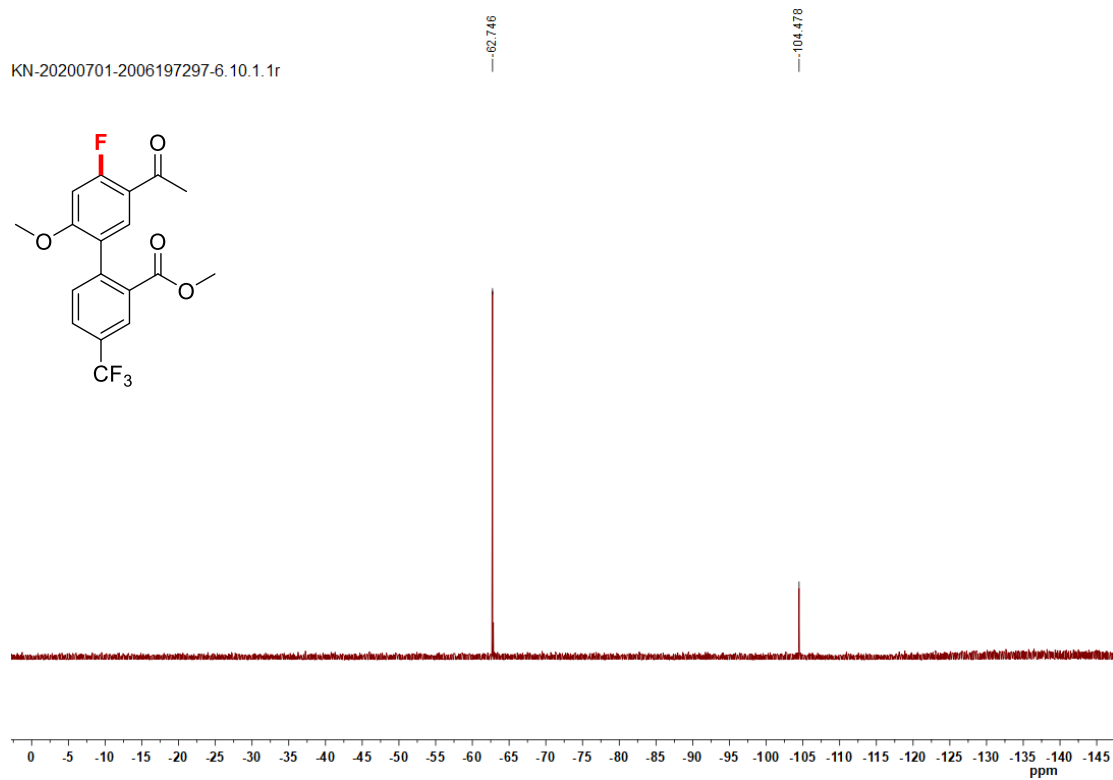

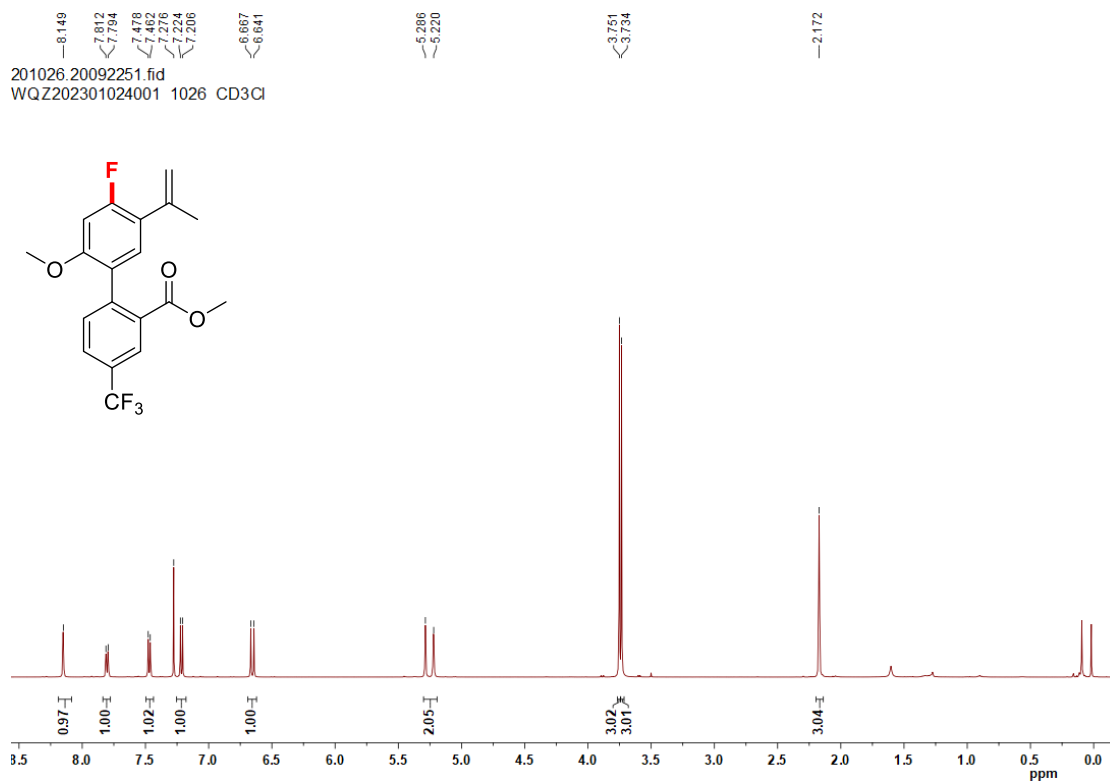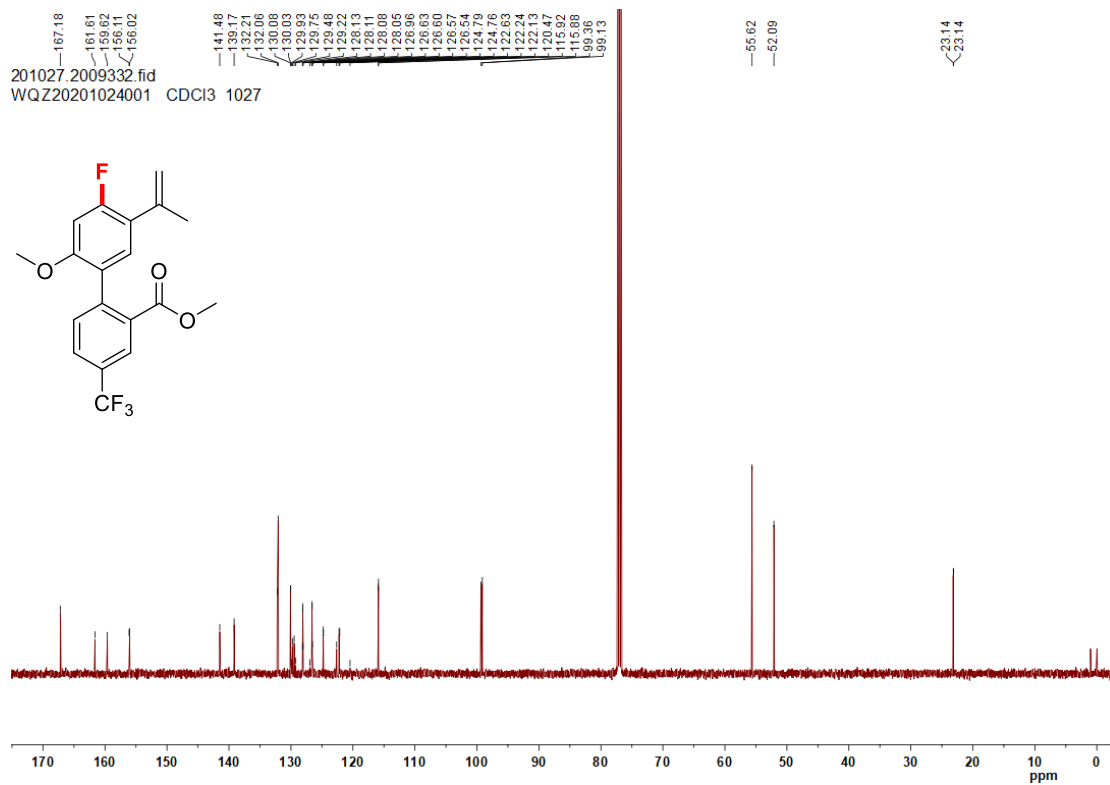

KN-20200701-2006197297-6.10.1.1r

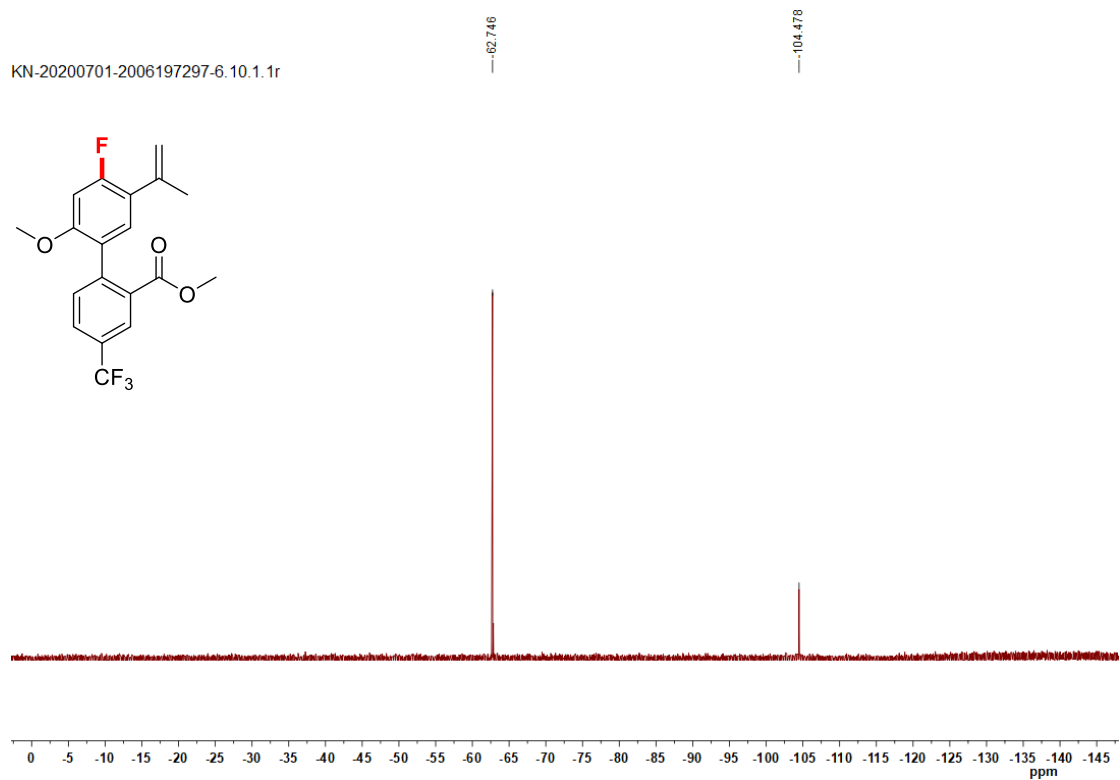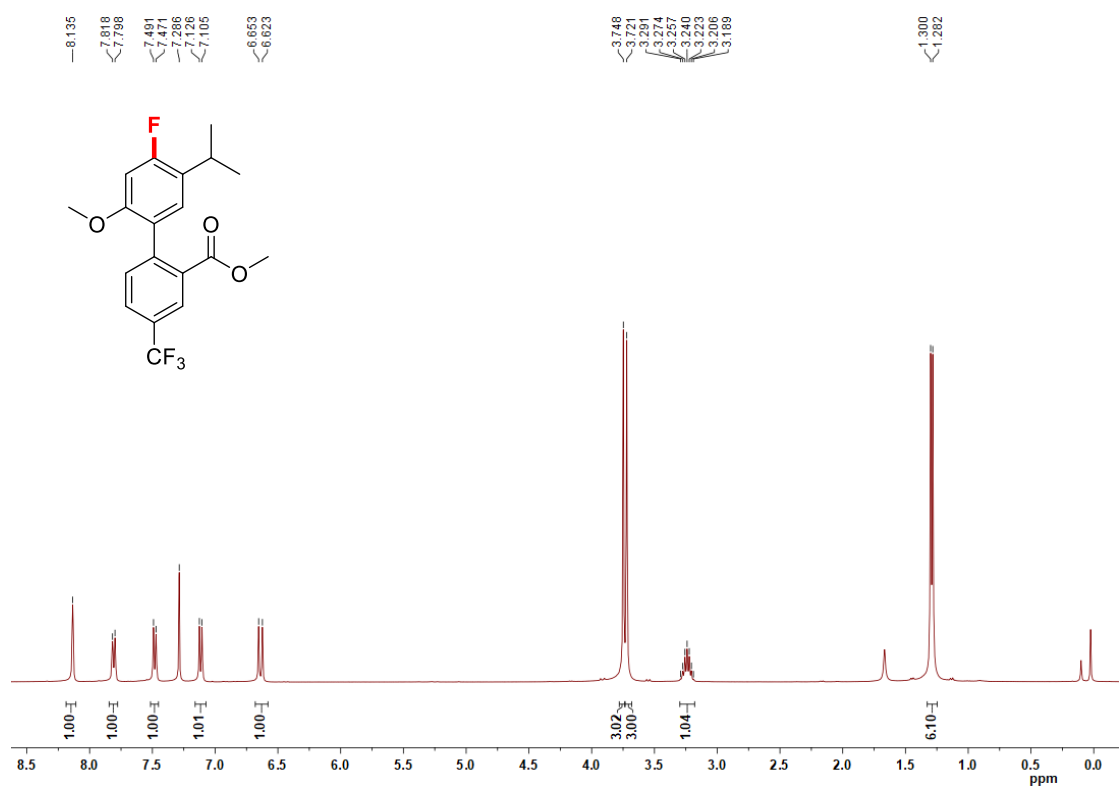

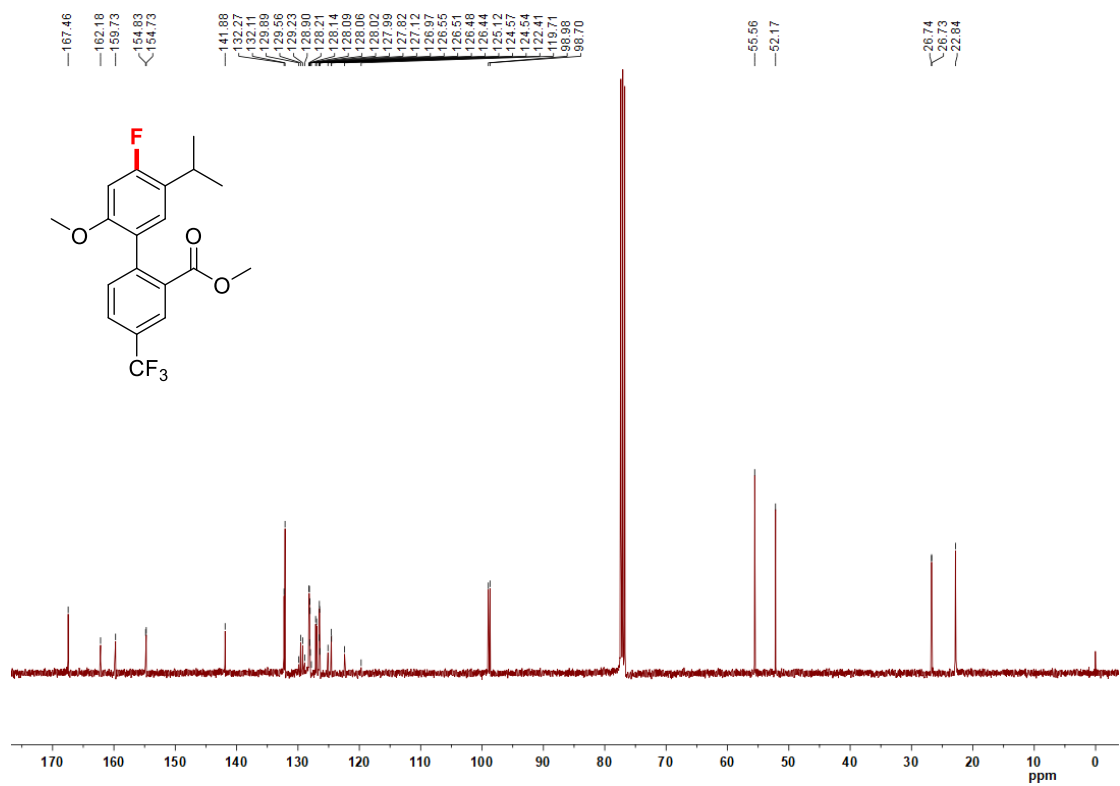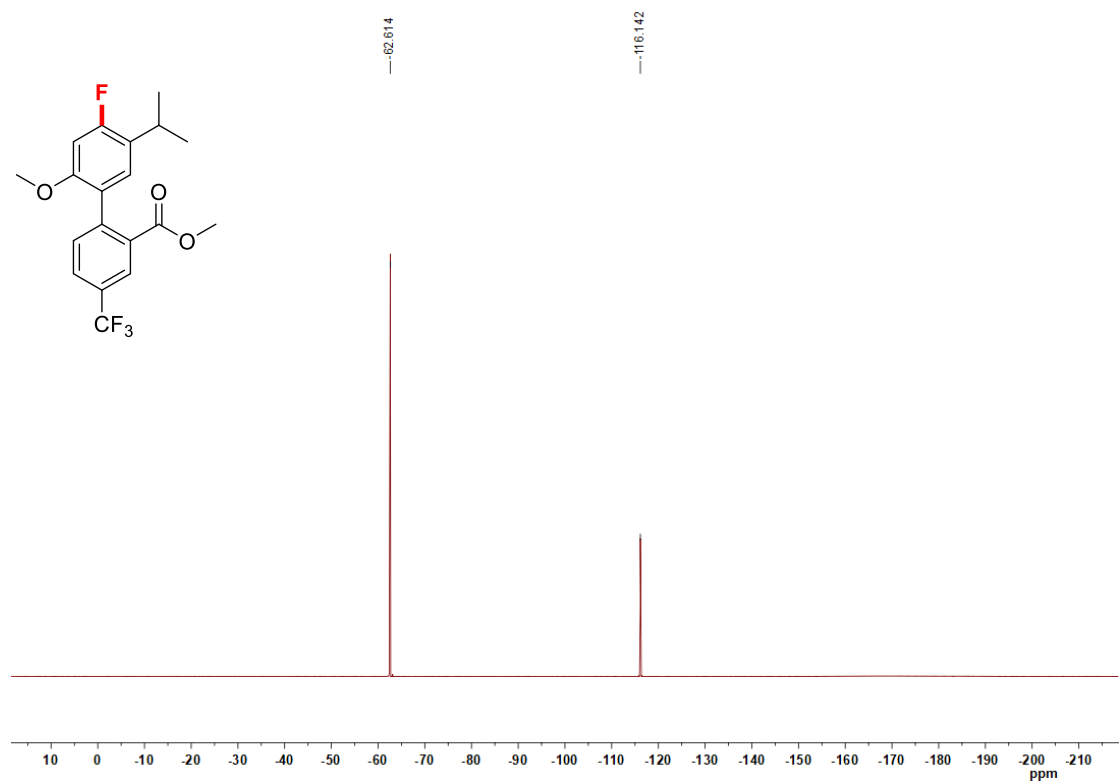



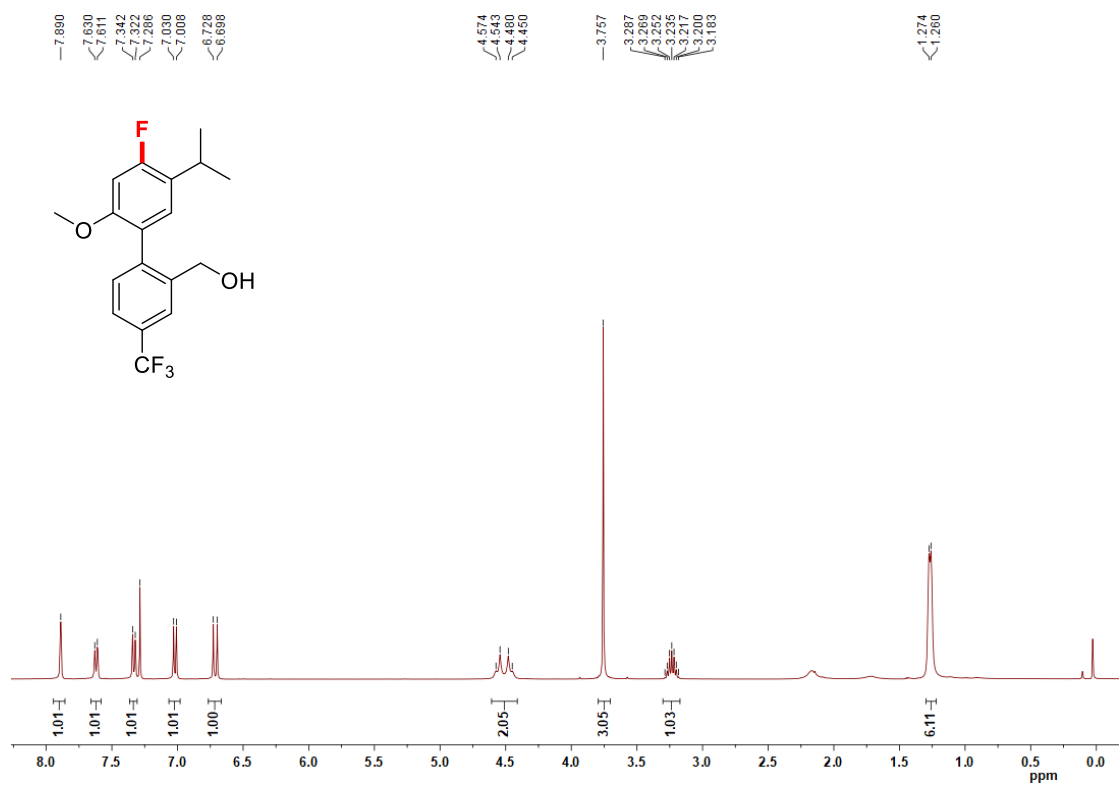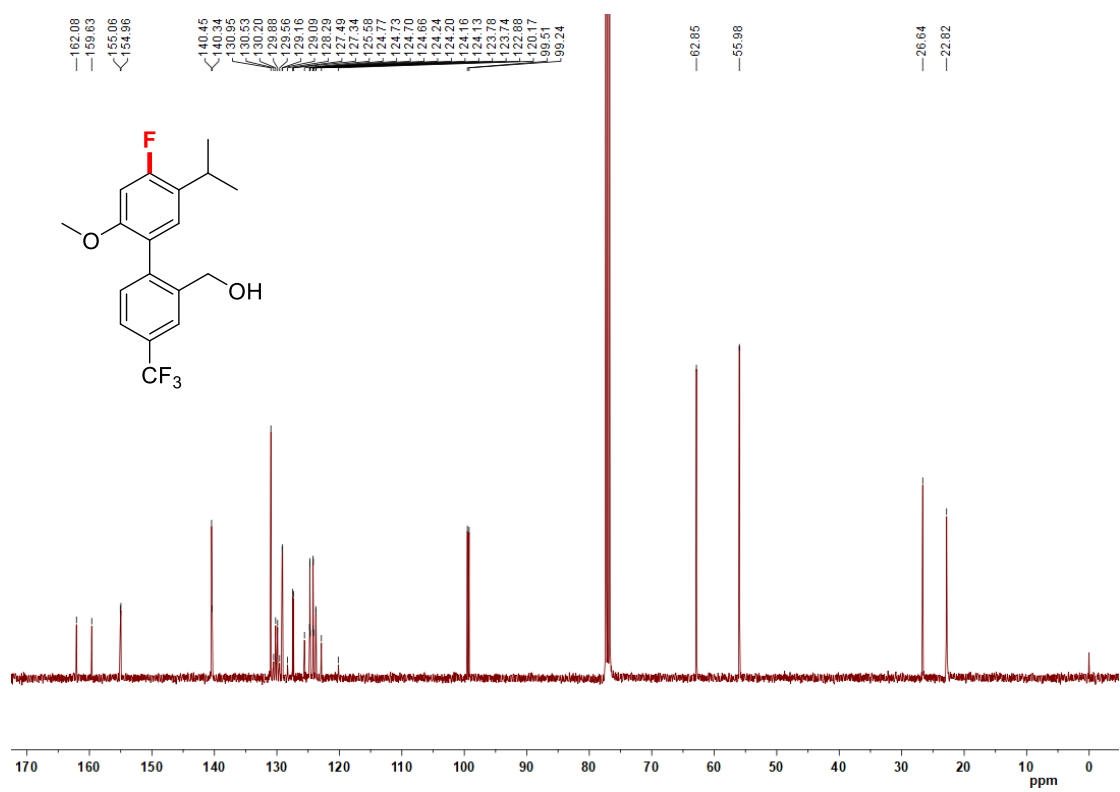

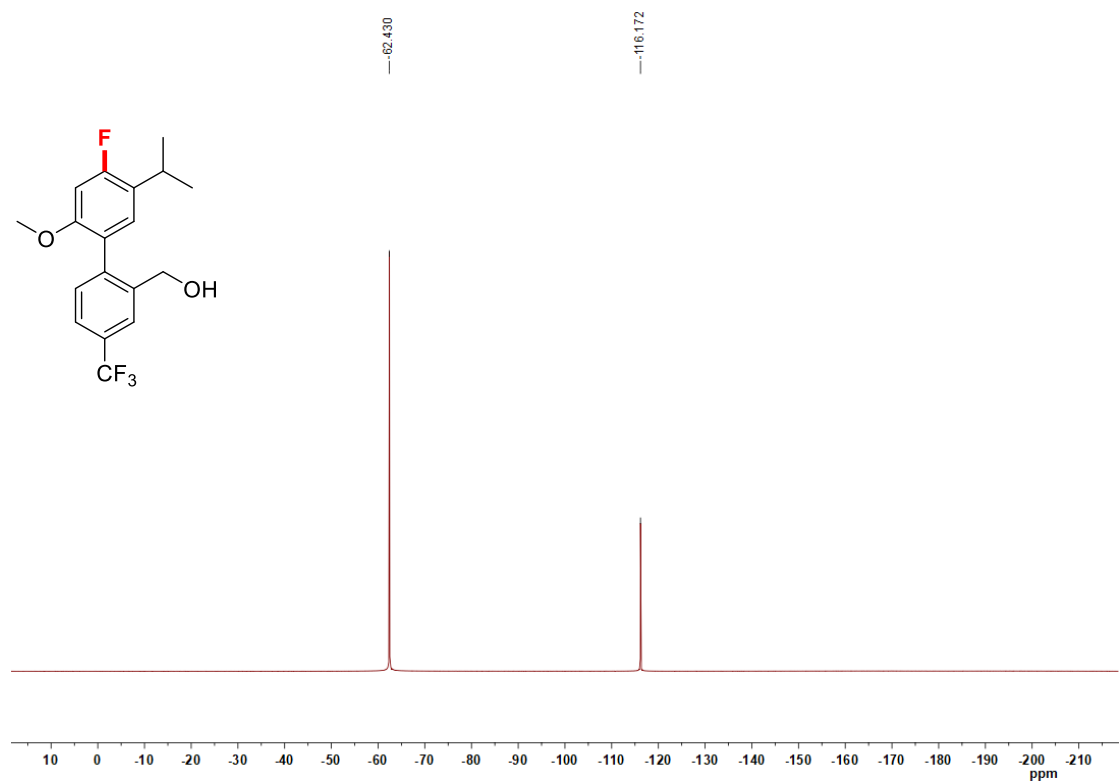

180411.1804495.fid  
WQZ20180412-YA CDCl<sub>3</sub> 0411

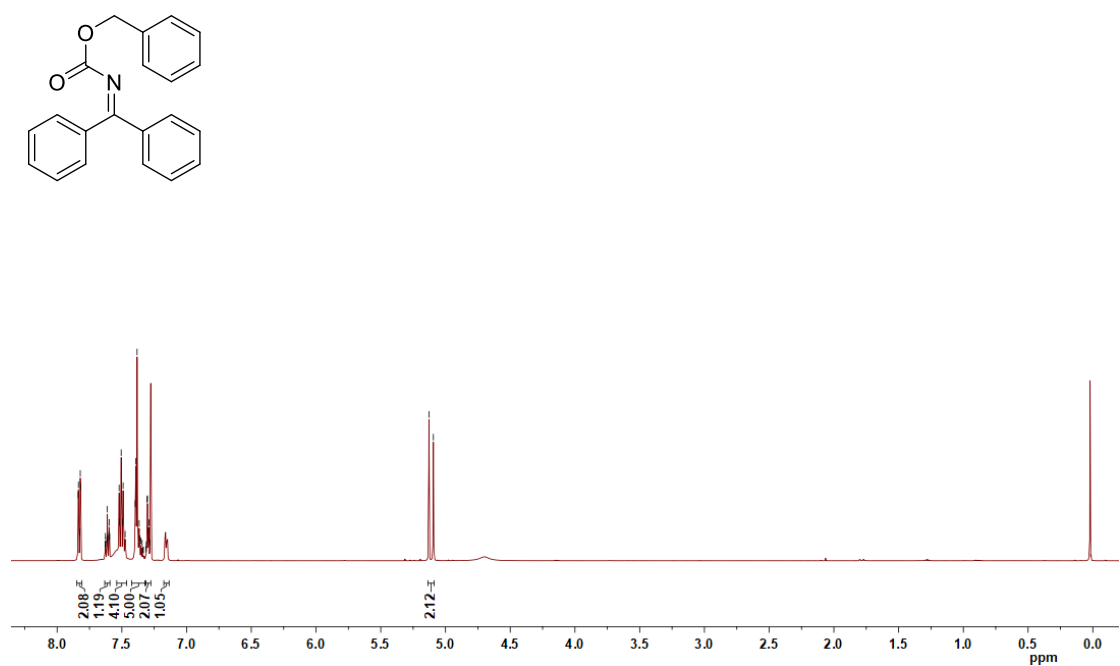

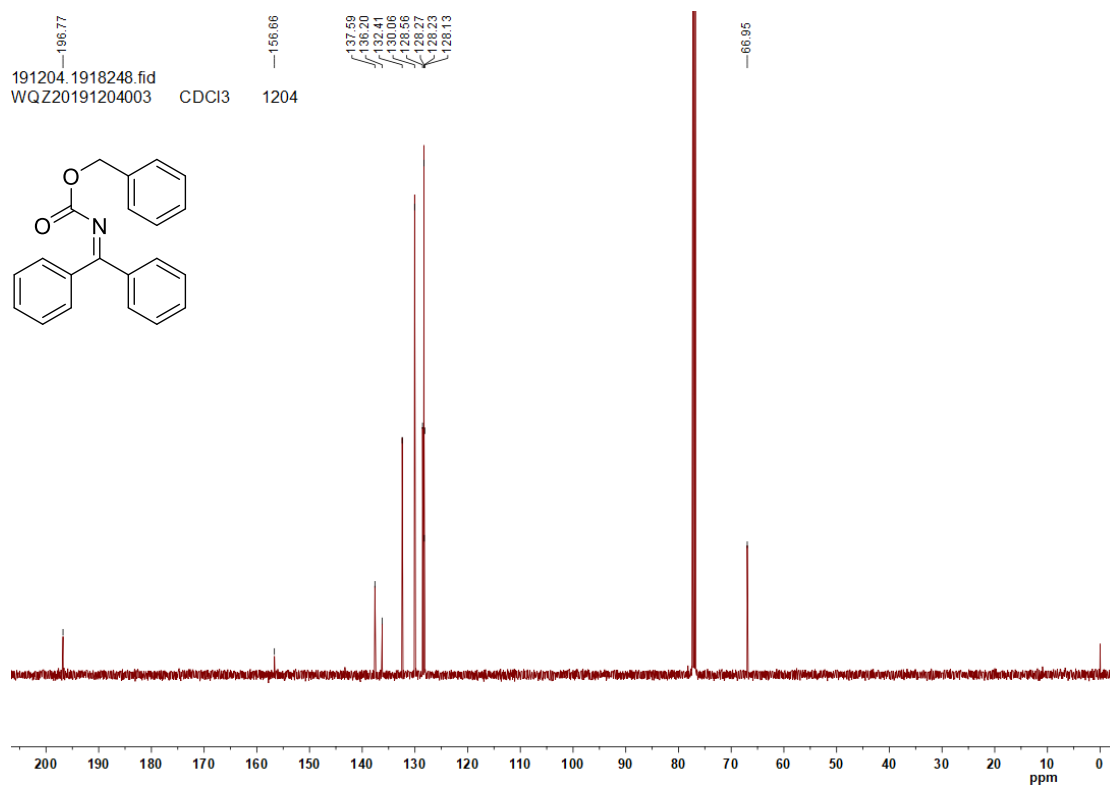

Supplement: d1cc01047f1.pdf [file d1cc01047f1.pdf]
